# Supplementary material
Source: PubMed Central journal article supplement (PMC3178270)

## **Conjugate Addition Initiated Nazarov Cyclization**

Joshua L. Brooks, Patrick A. Caruana, Alison J. Frontier\*

*Department of Chemistry, University of Rochester, Rochester, New York 14627*

frontier@chem.rochester.edu

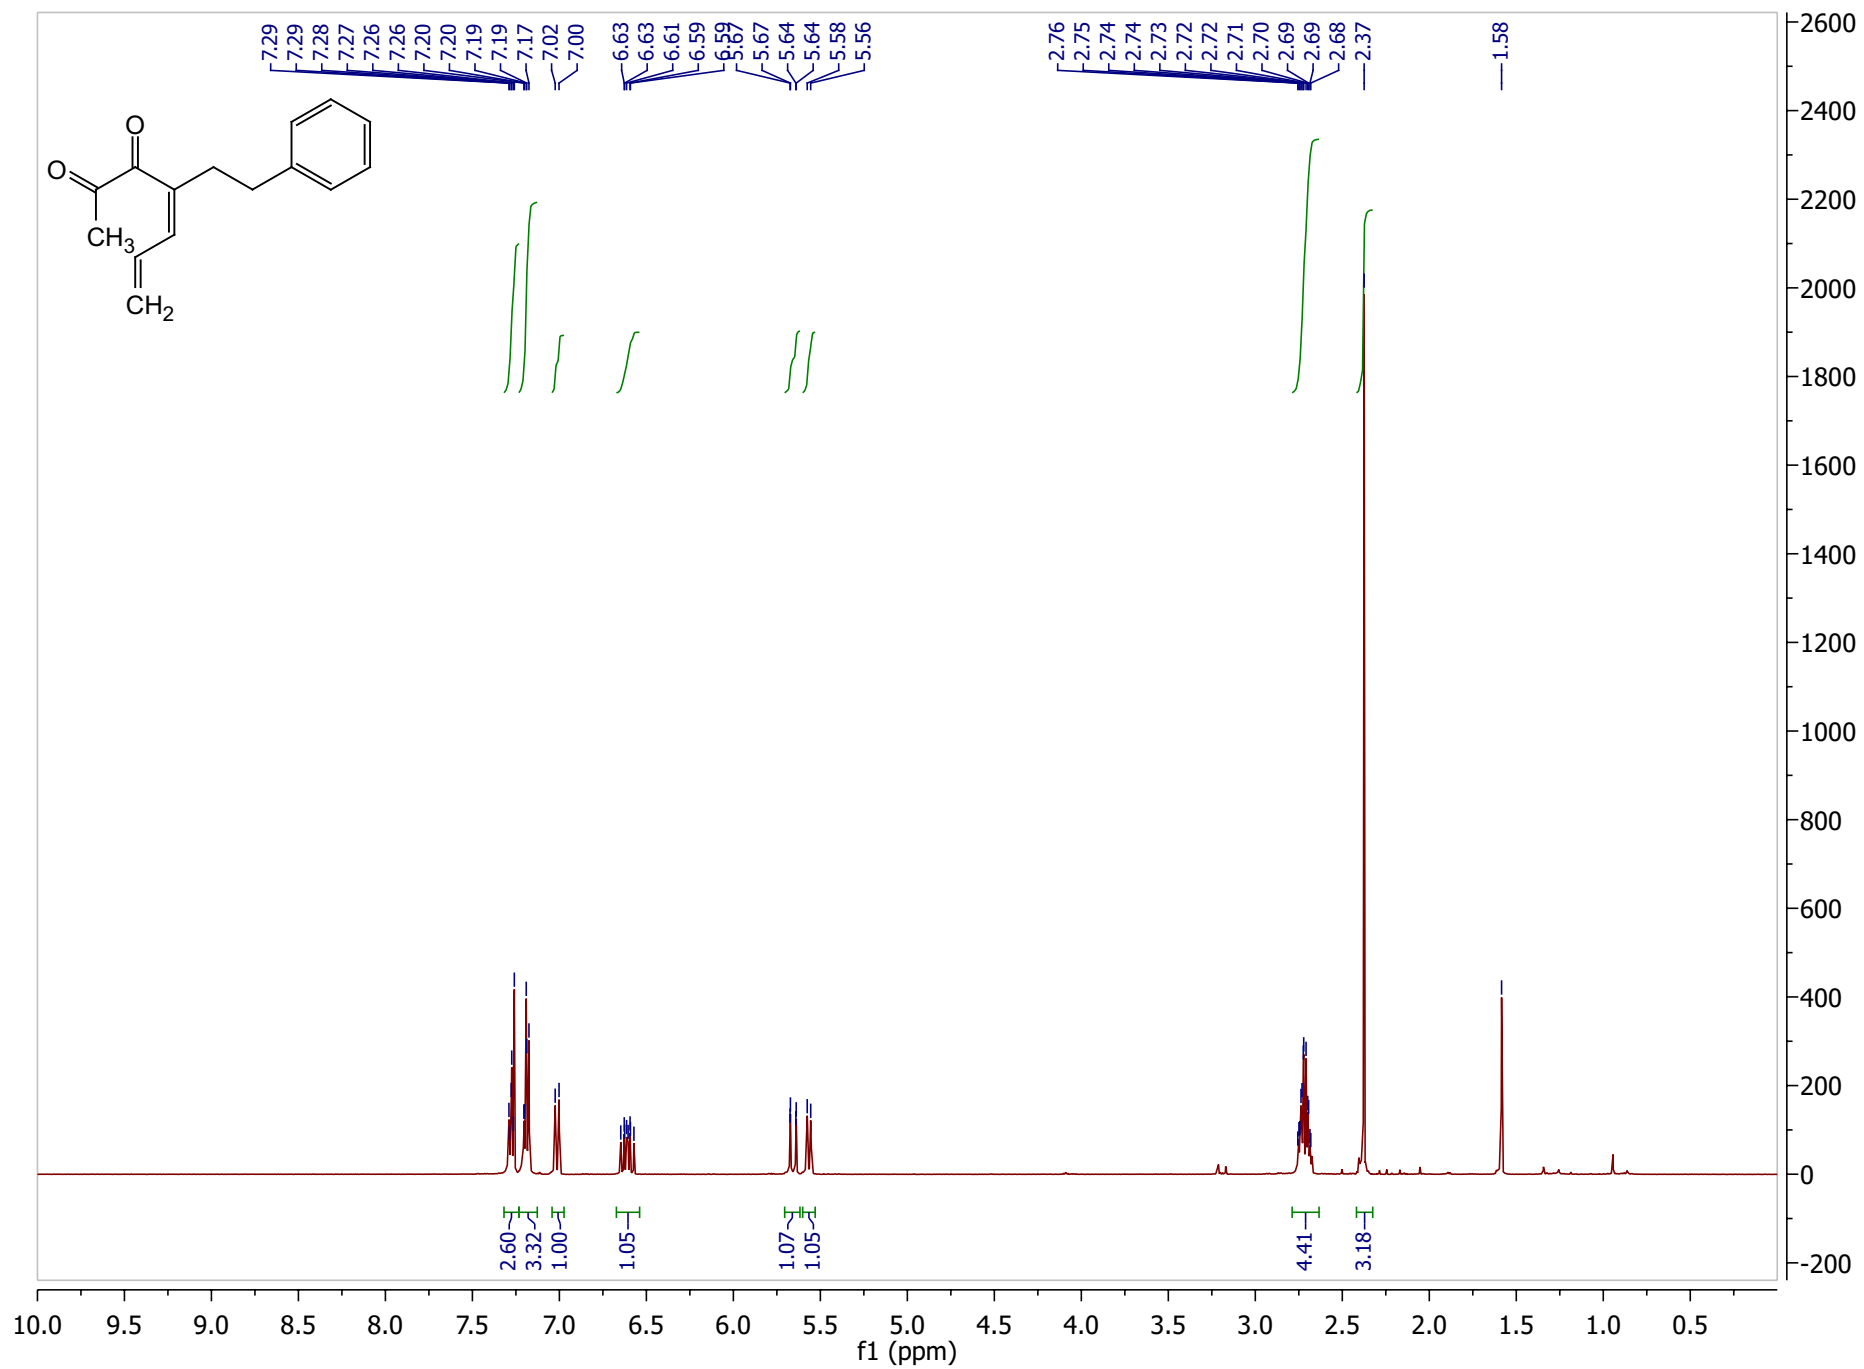

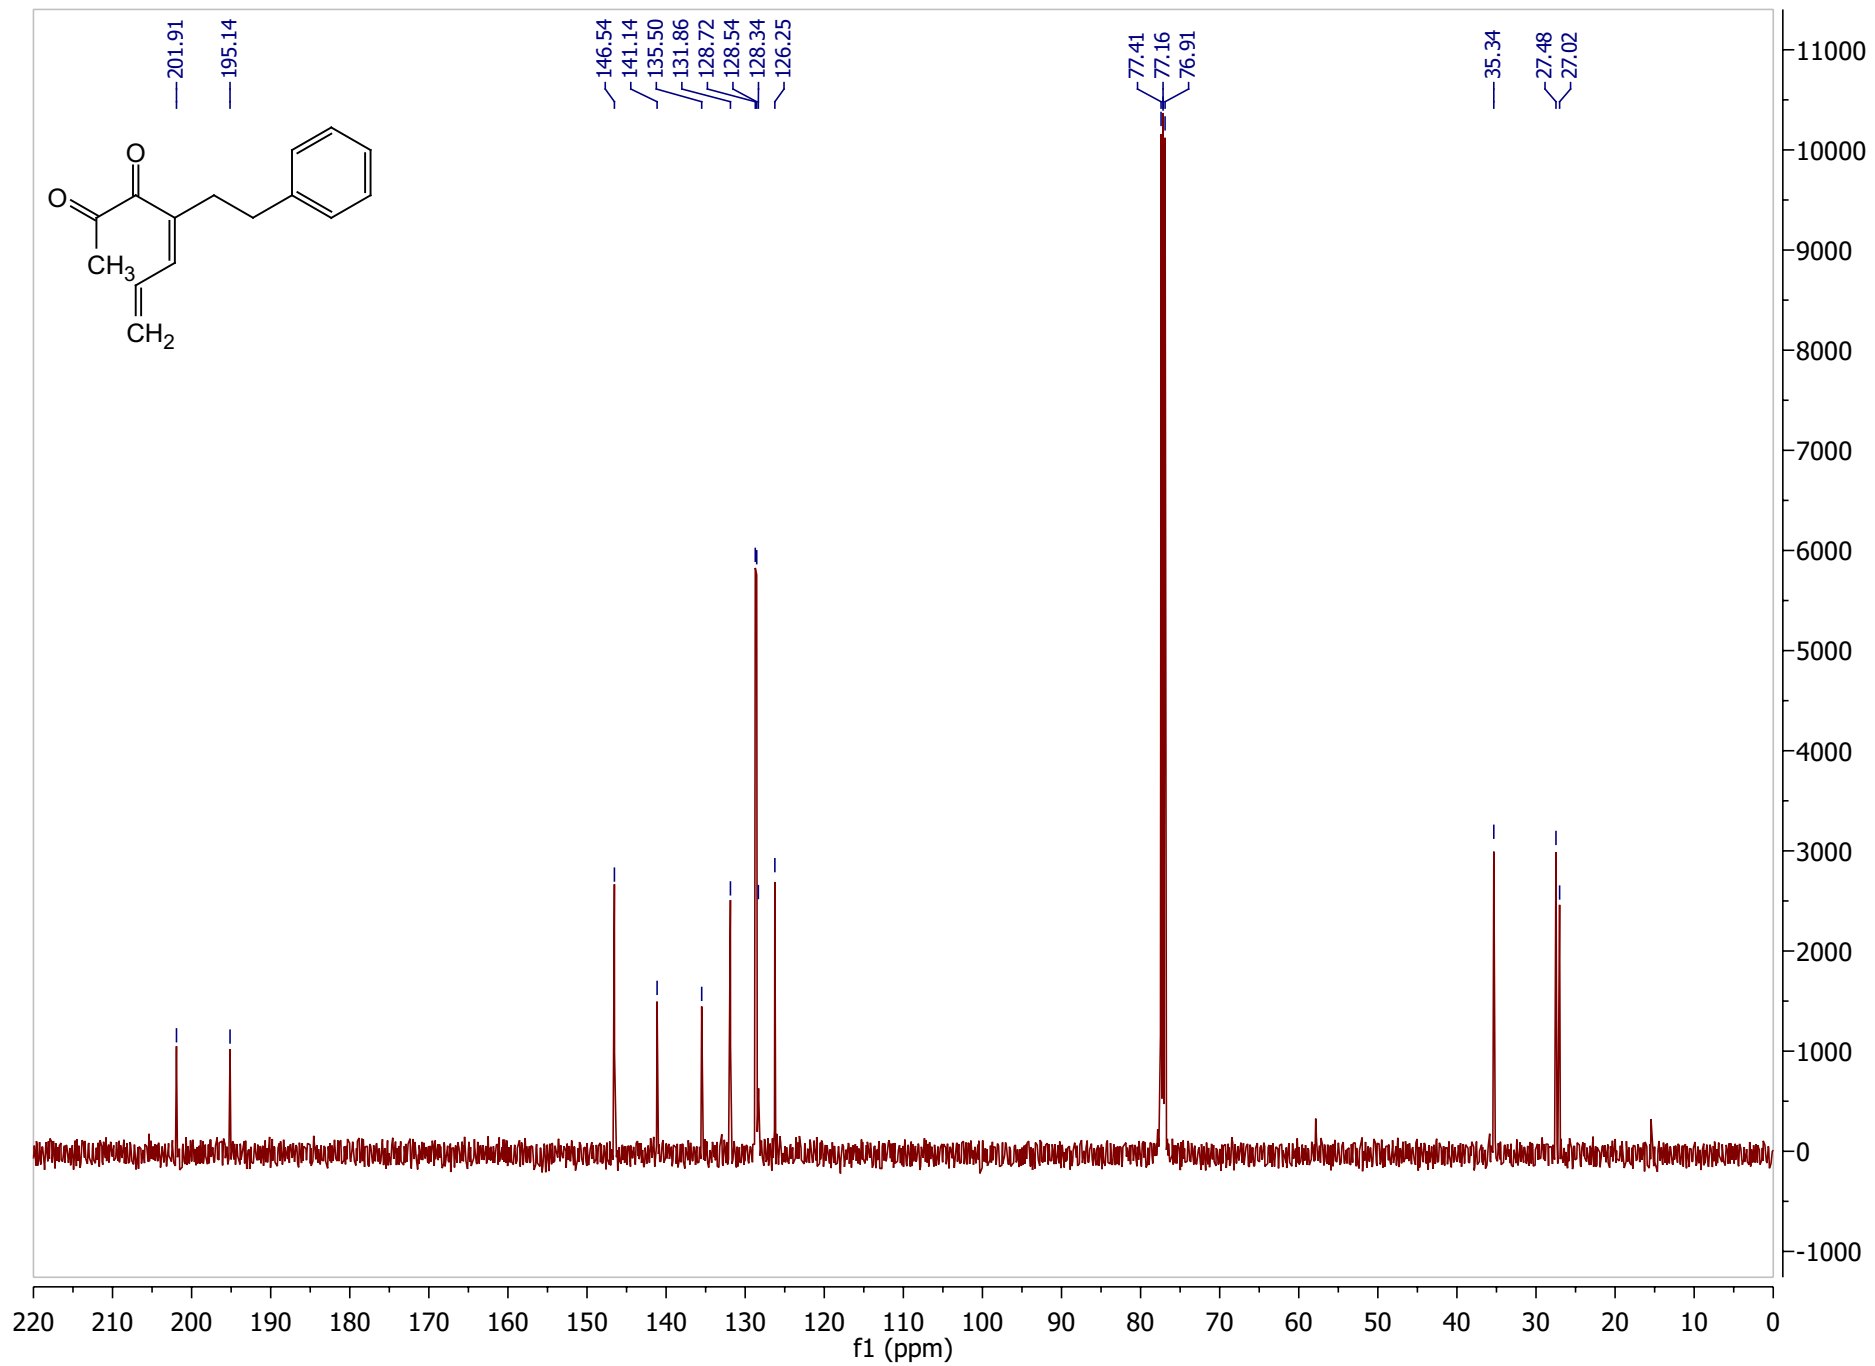

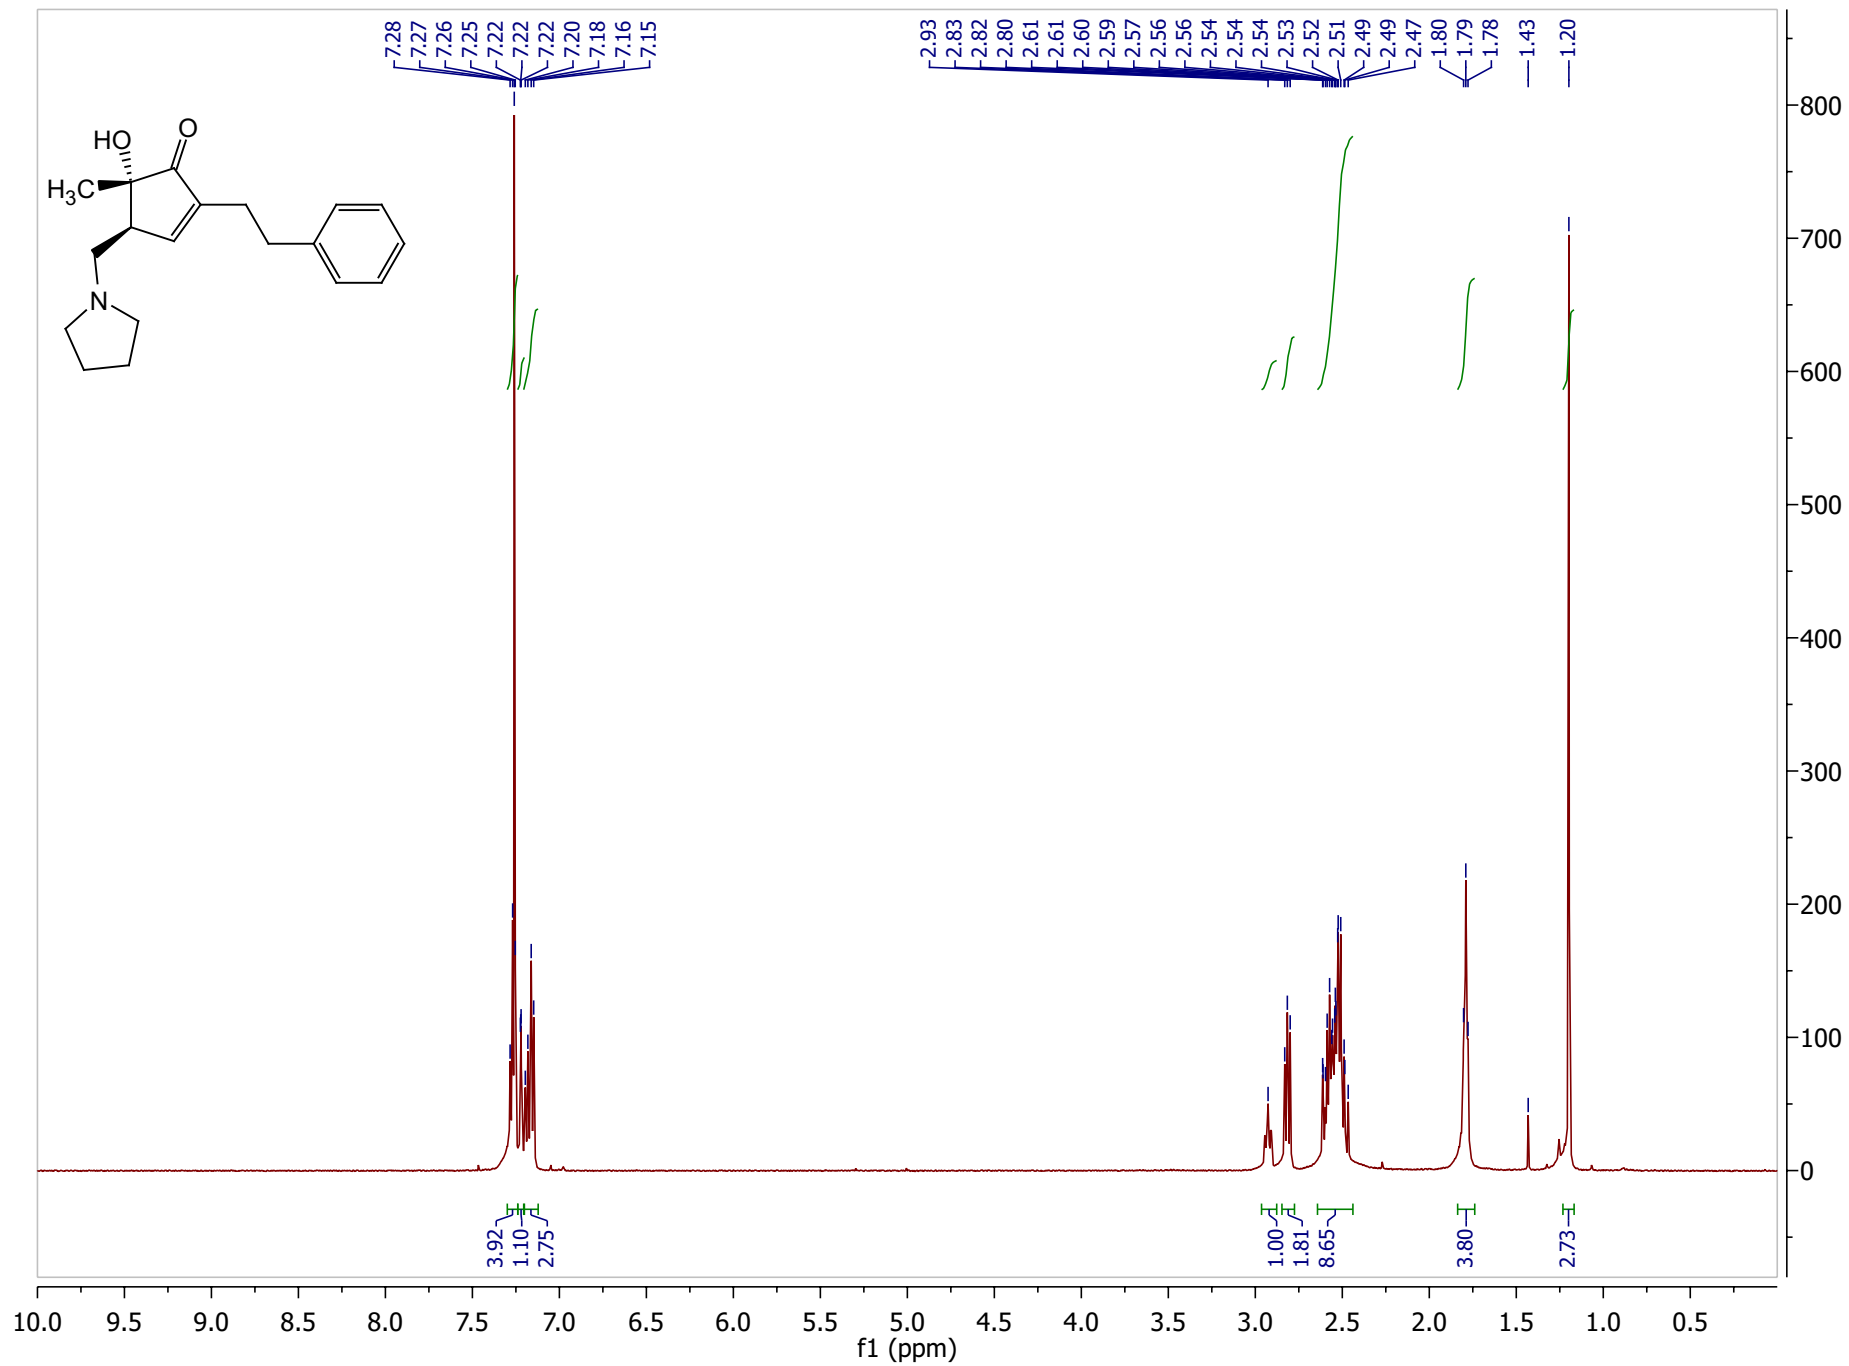

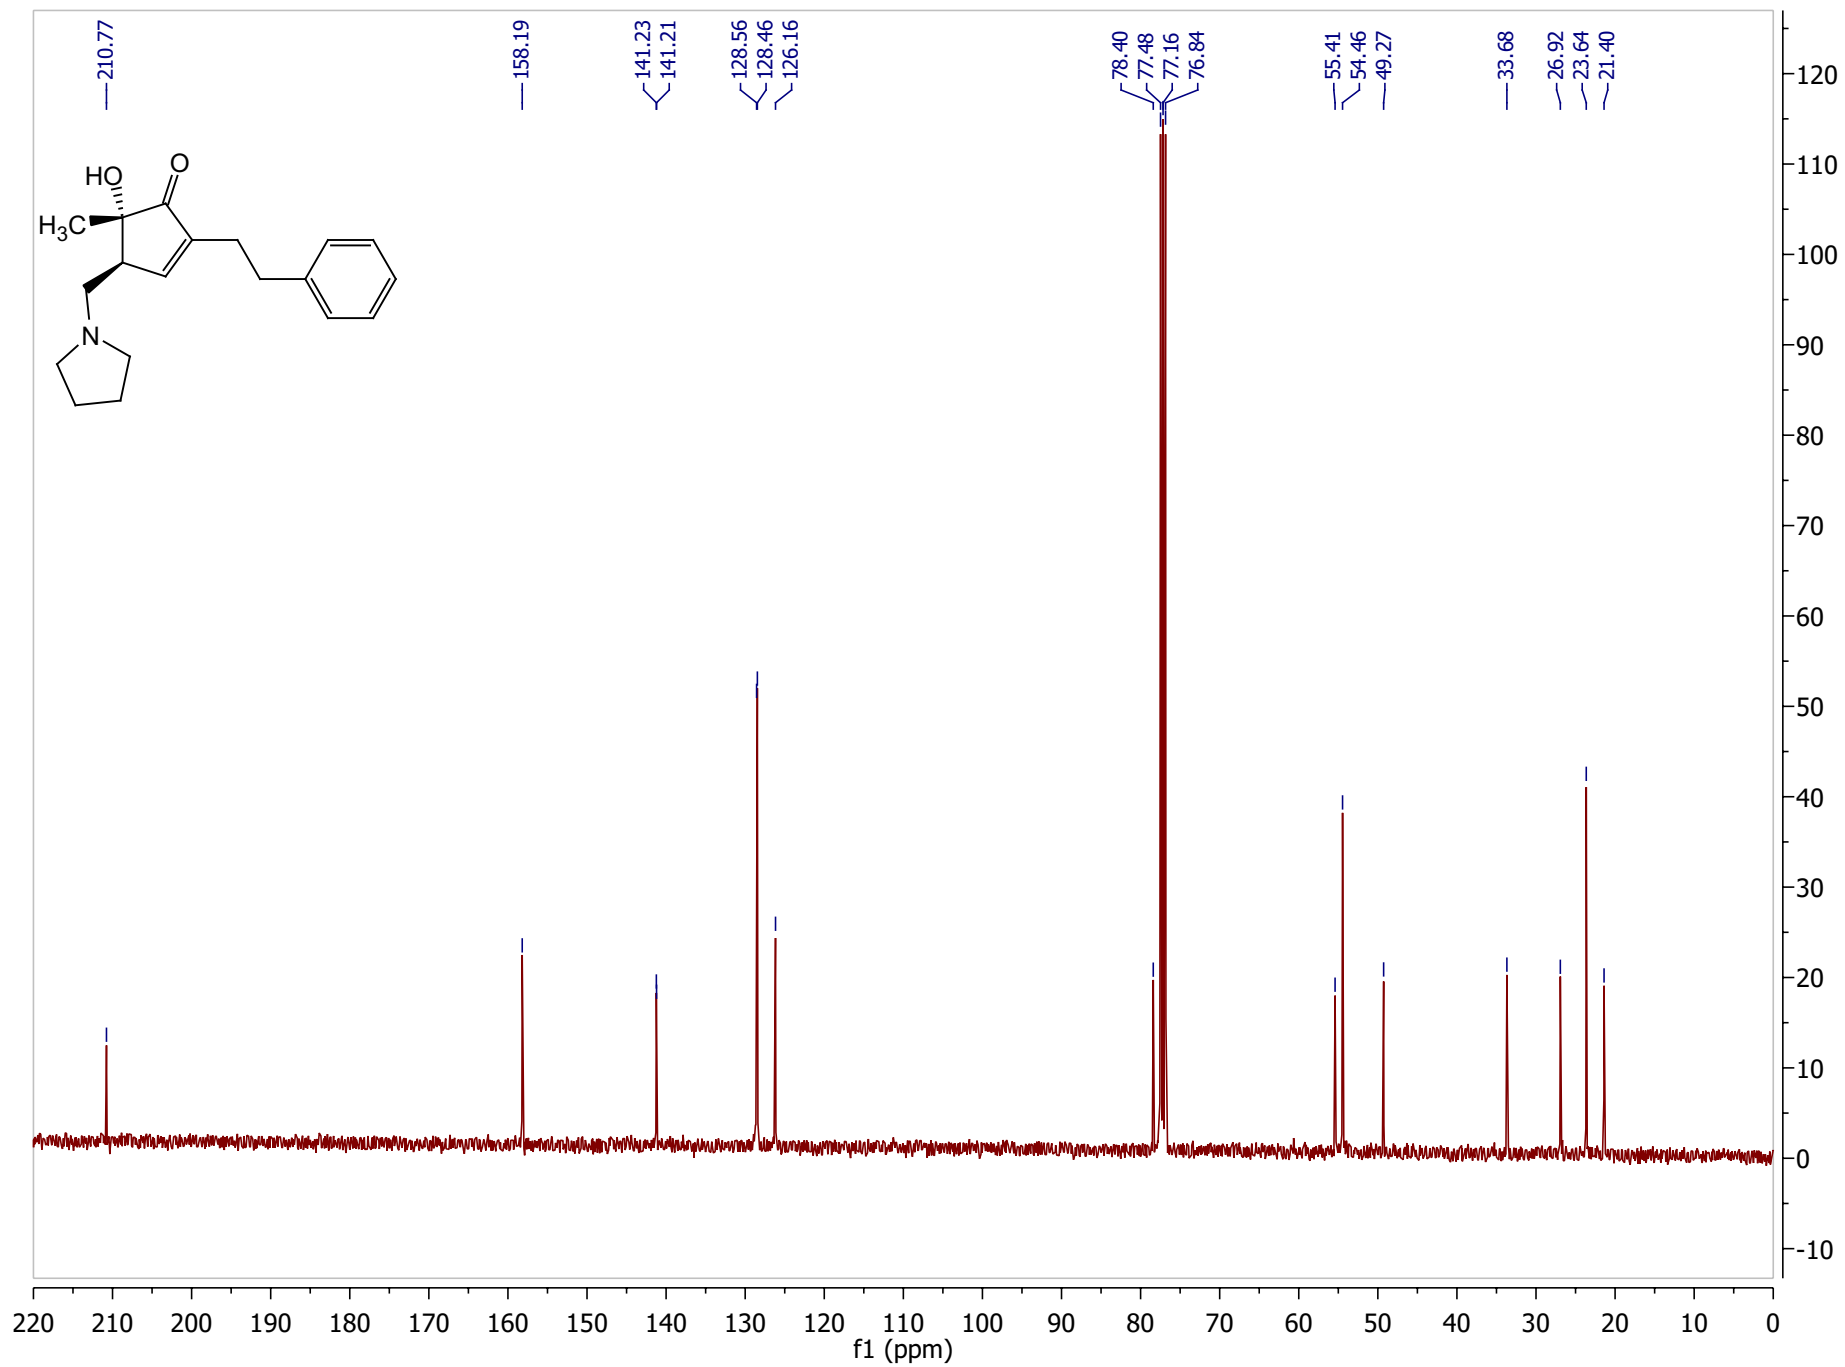

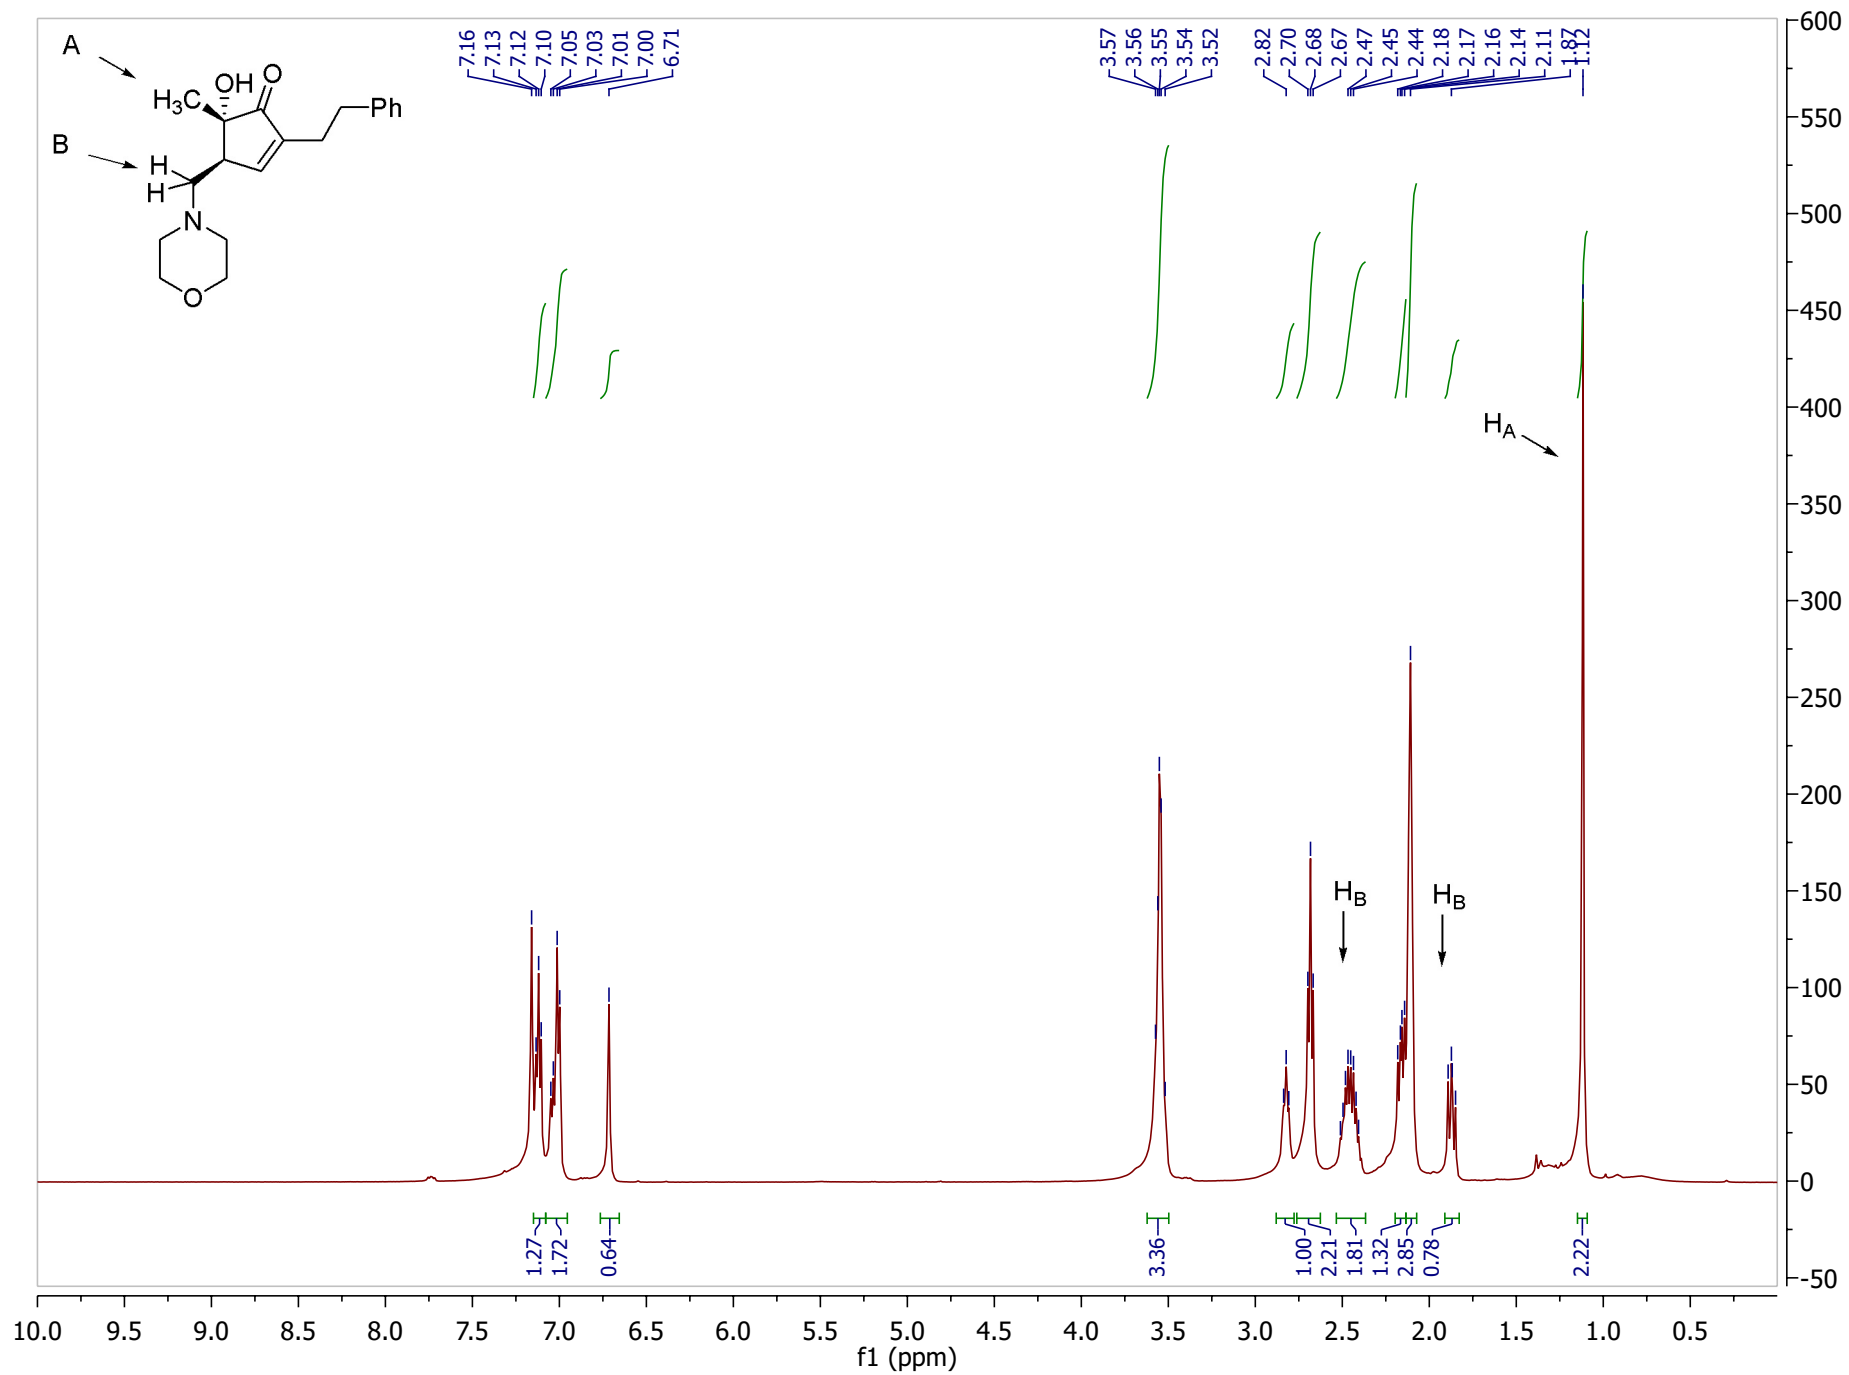

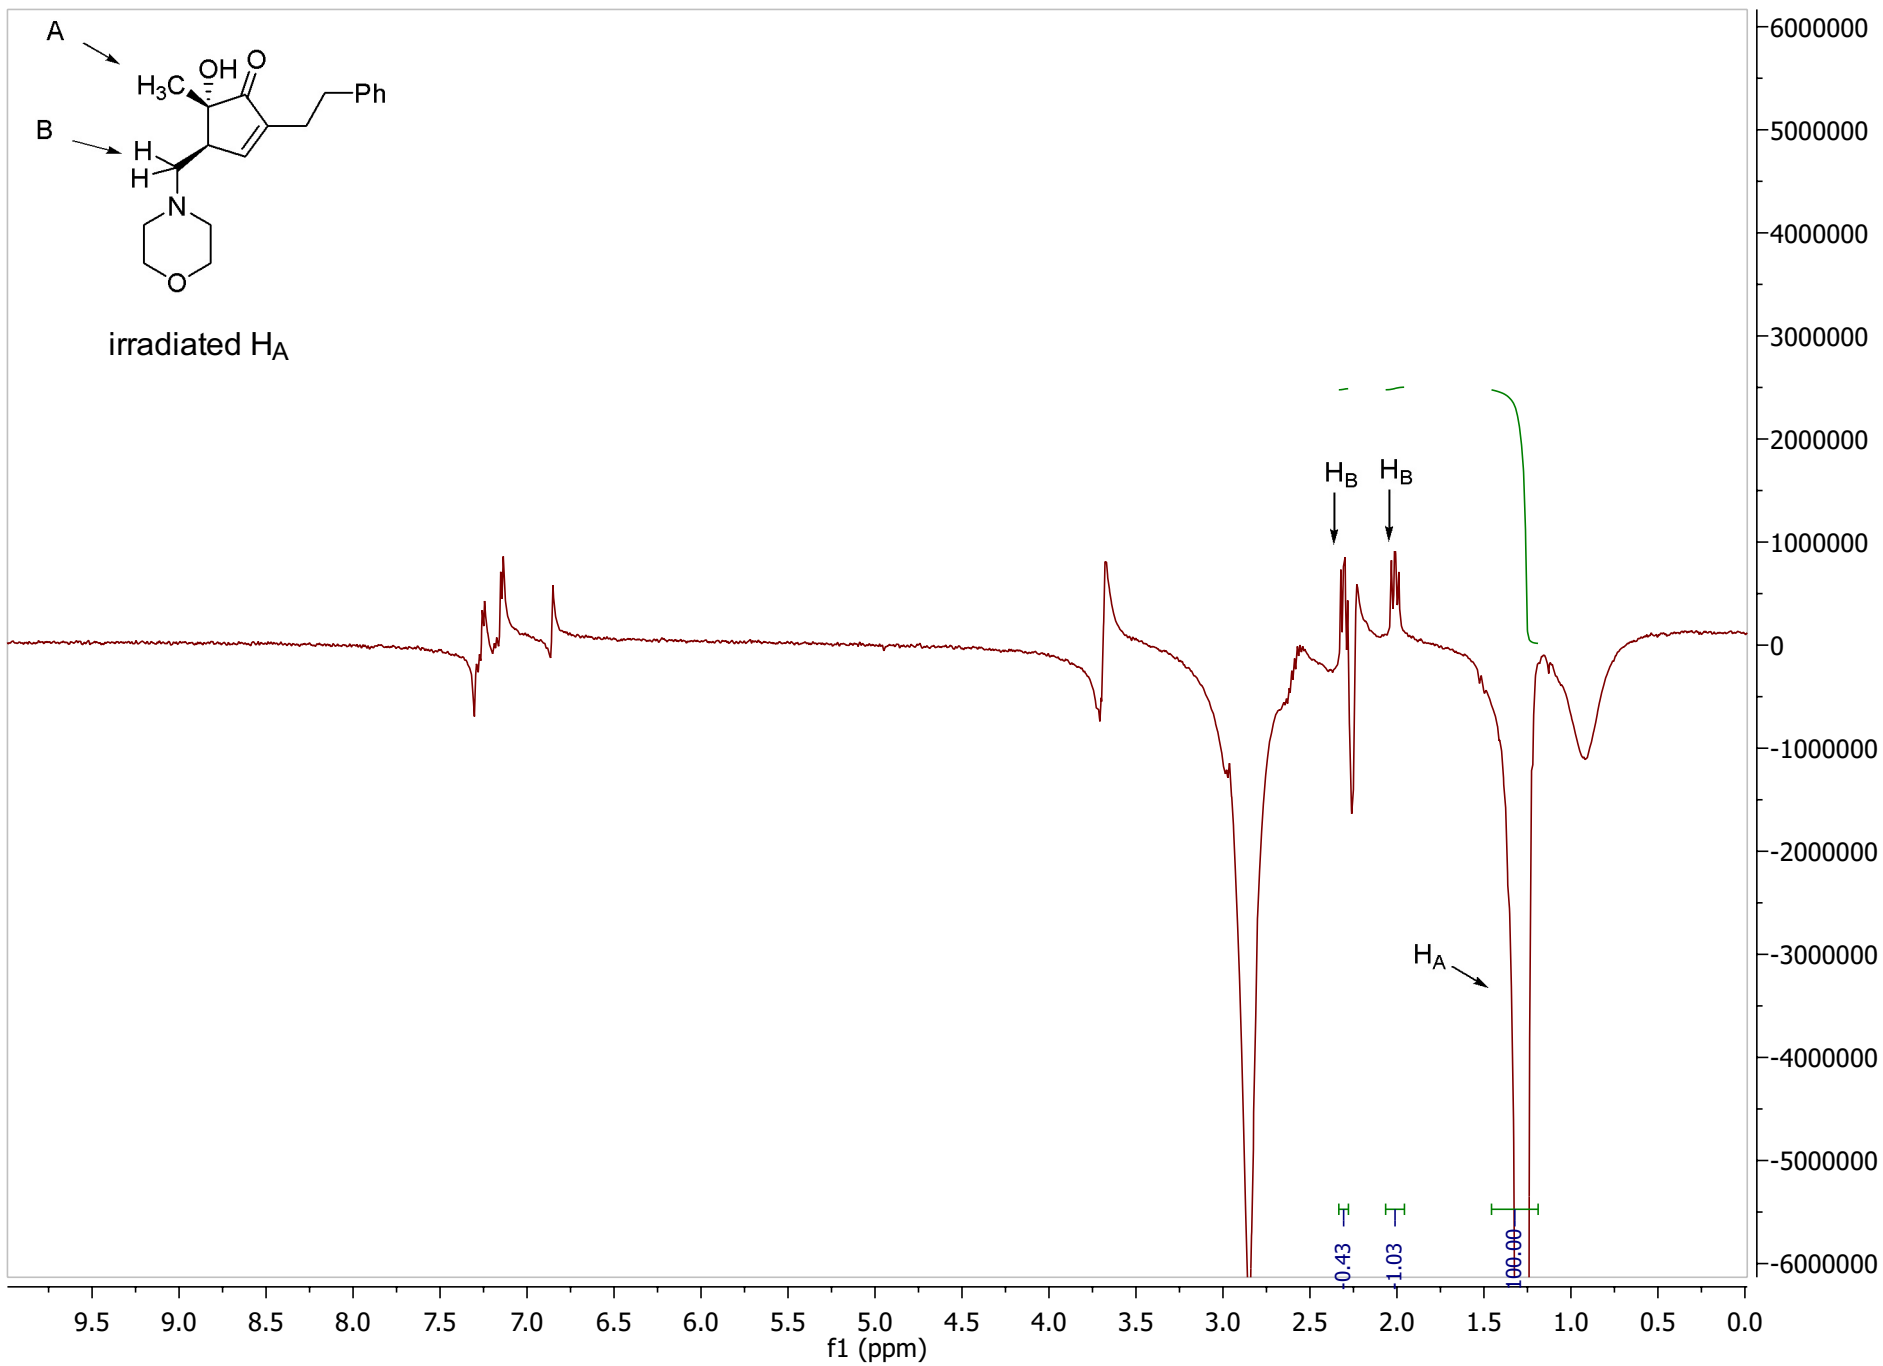

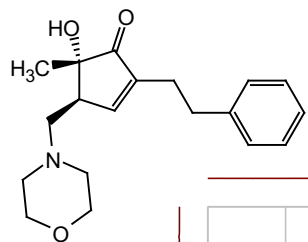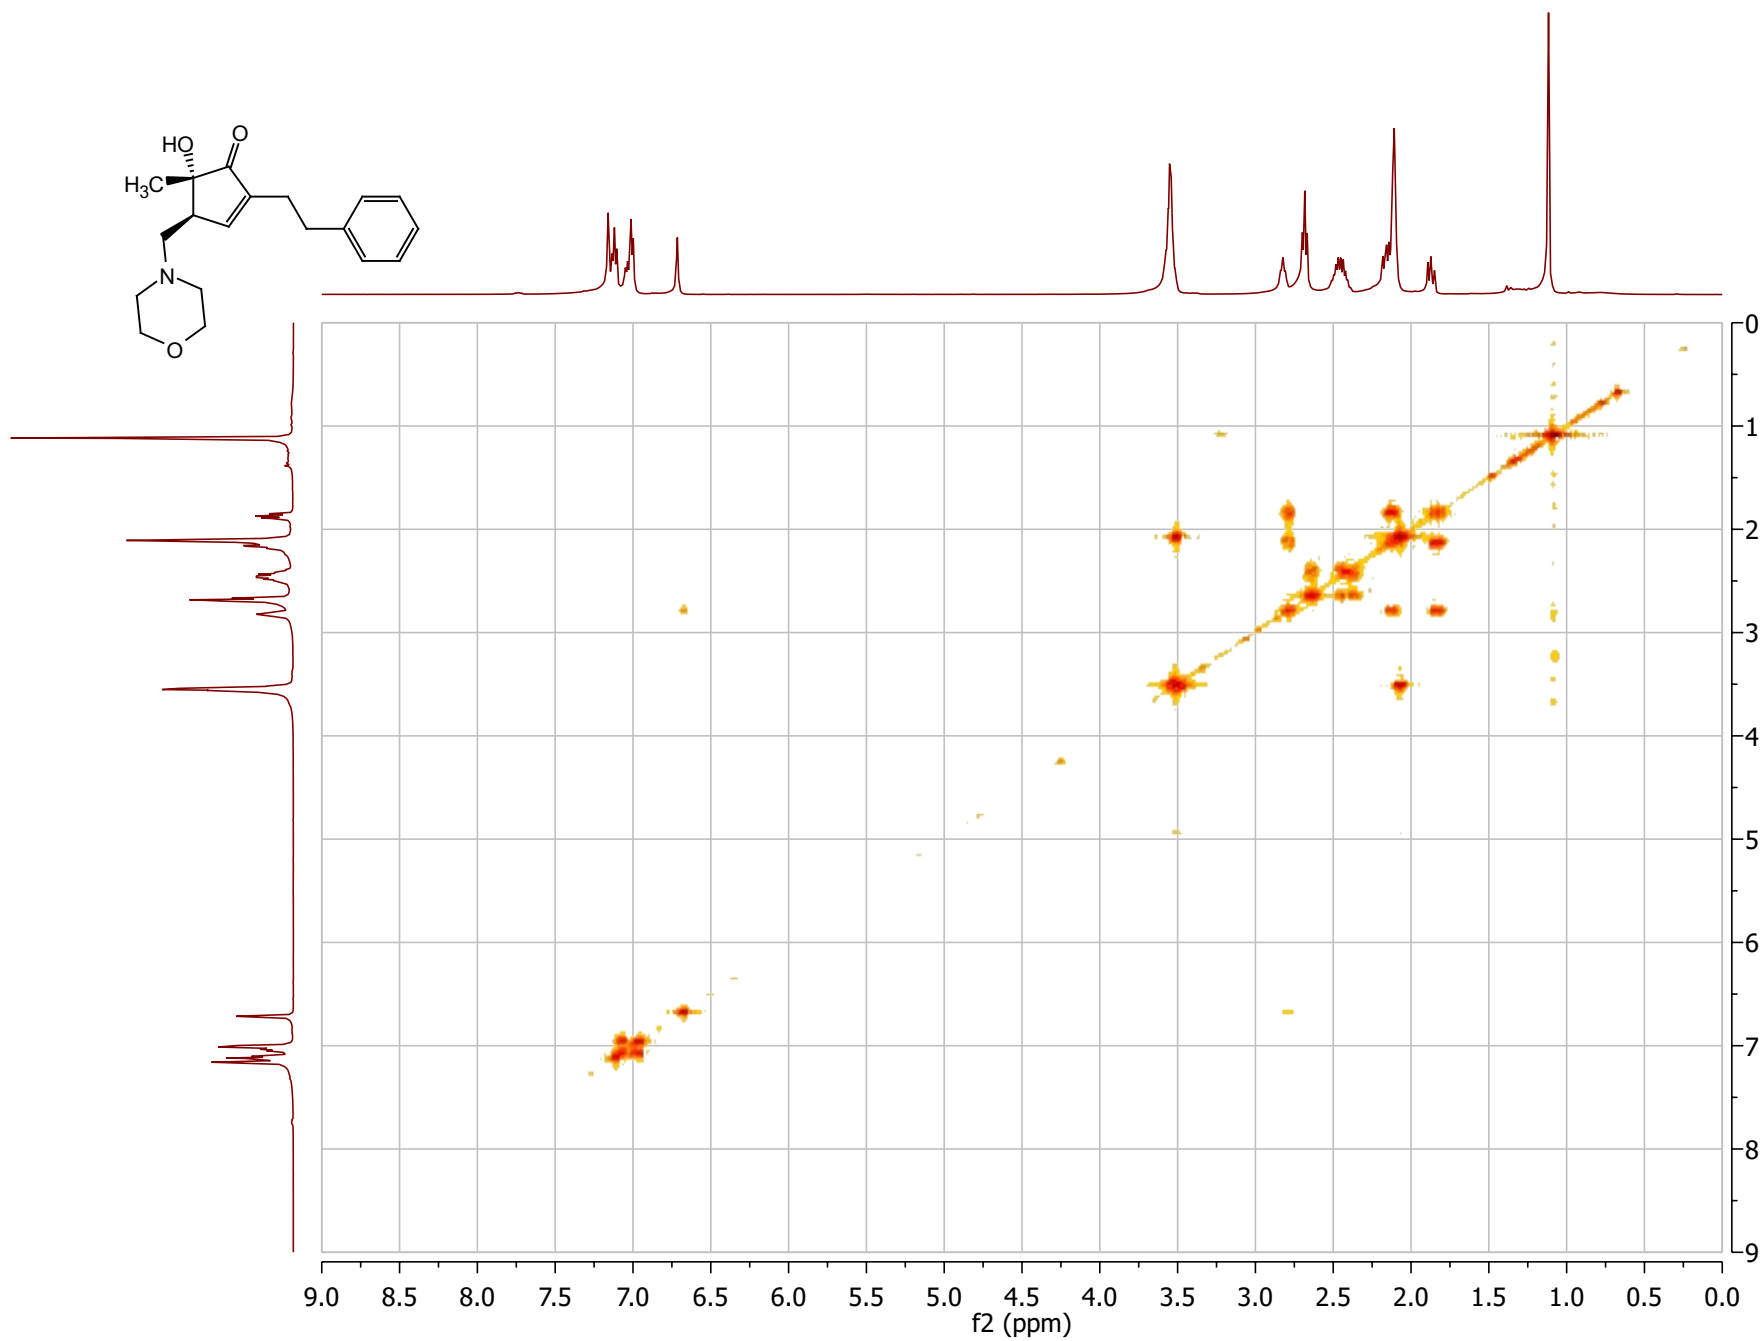



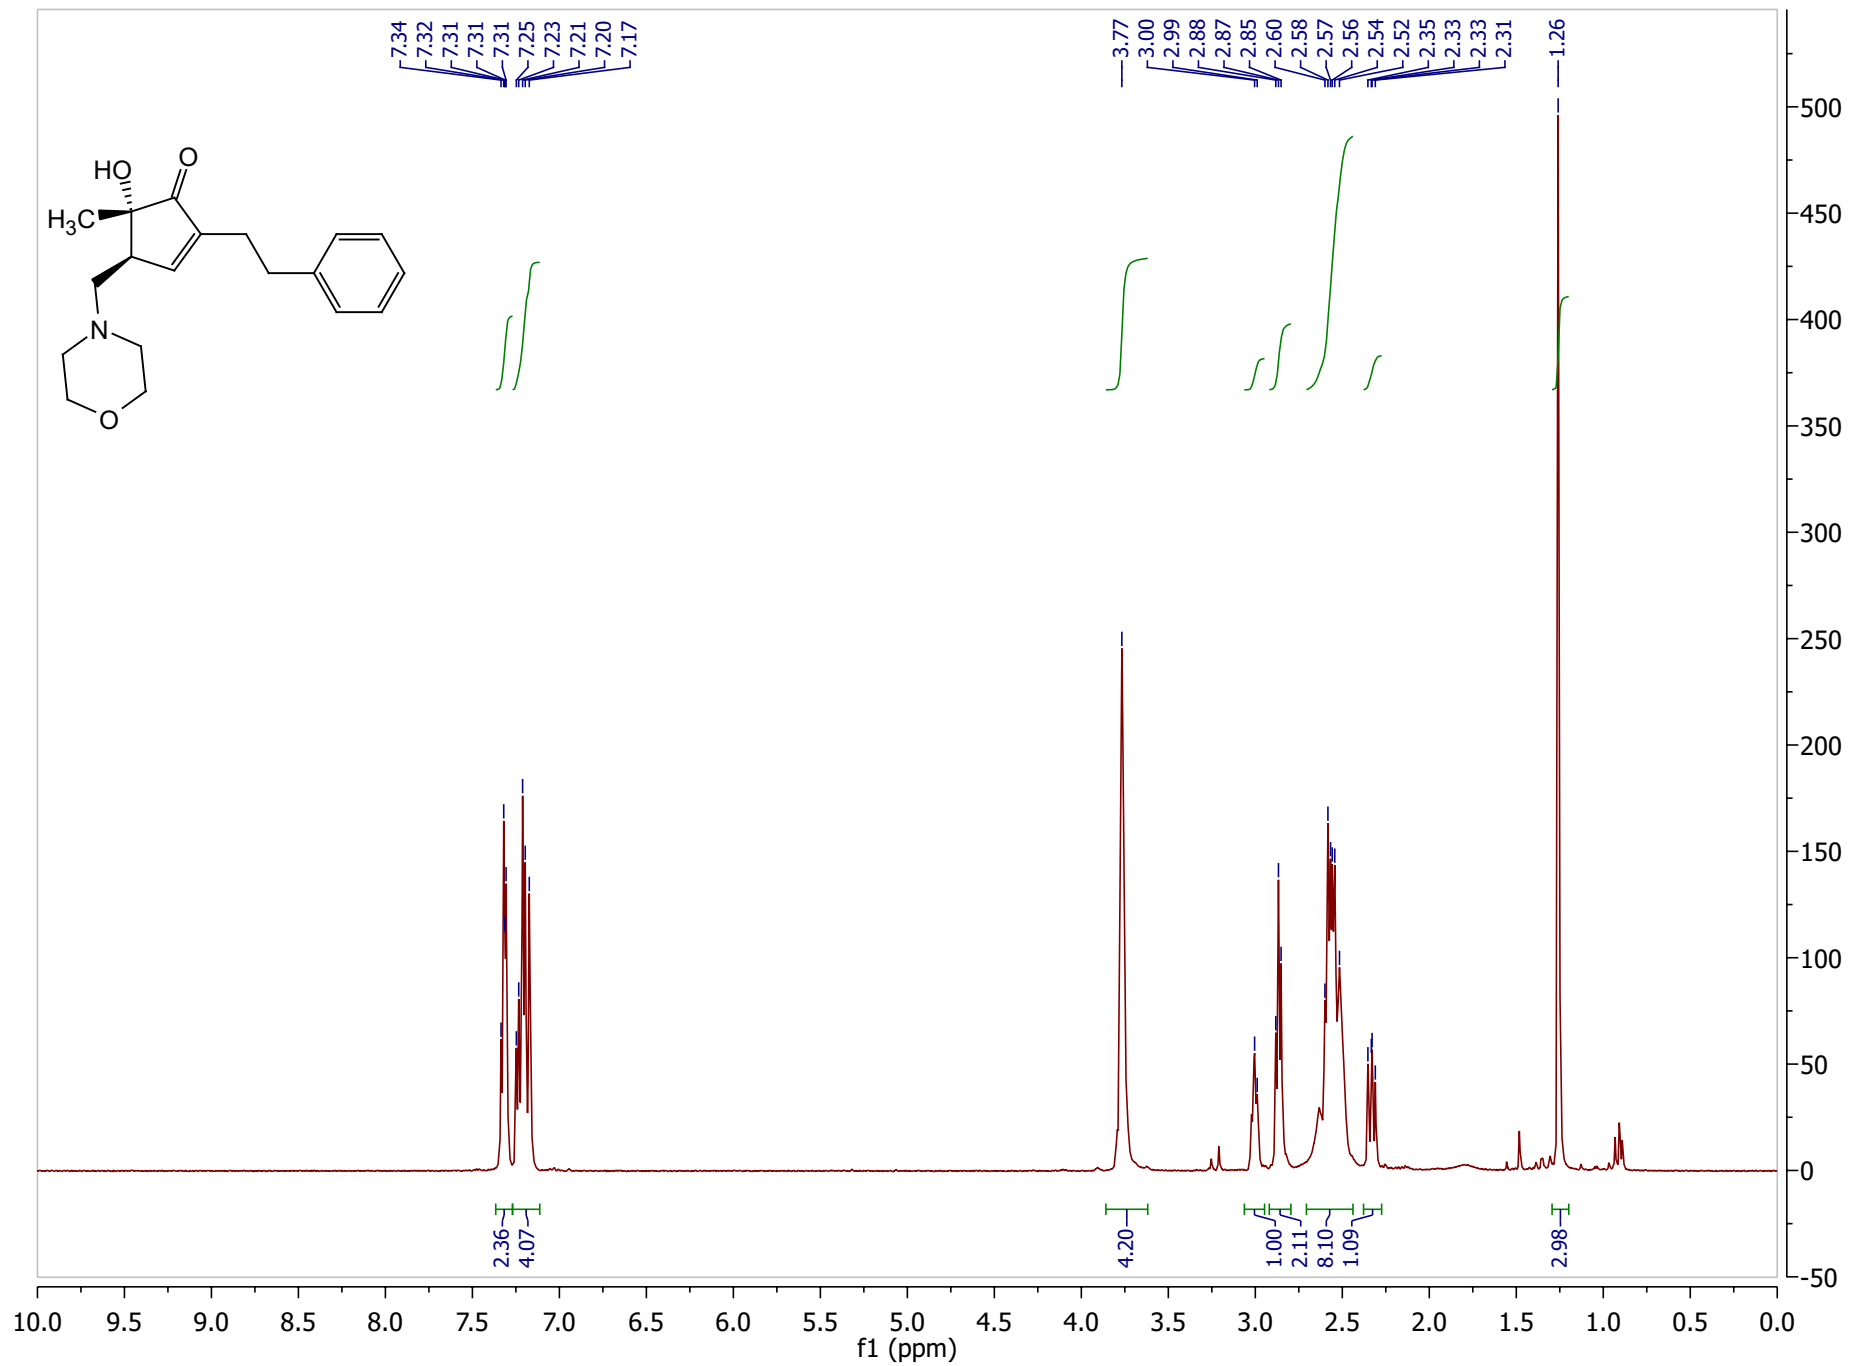

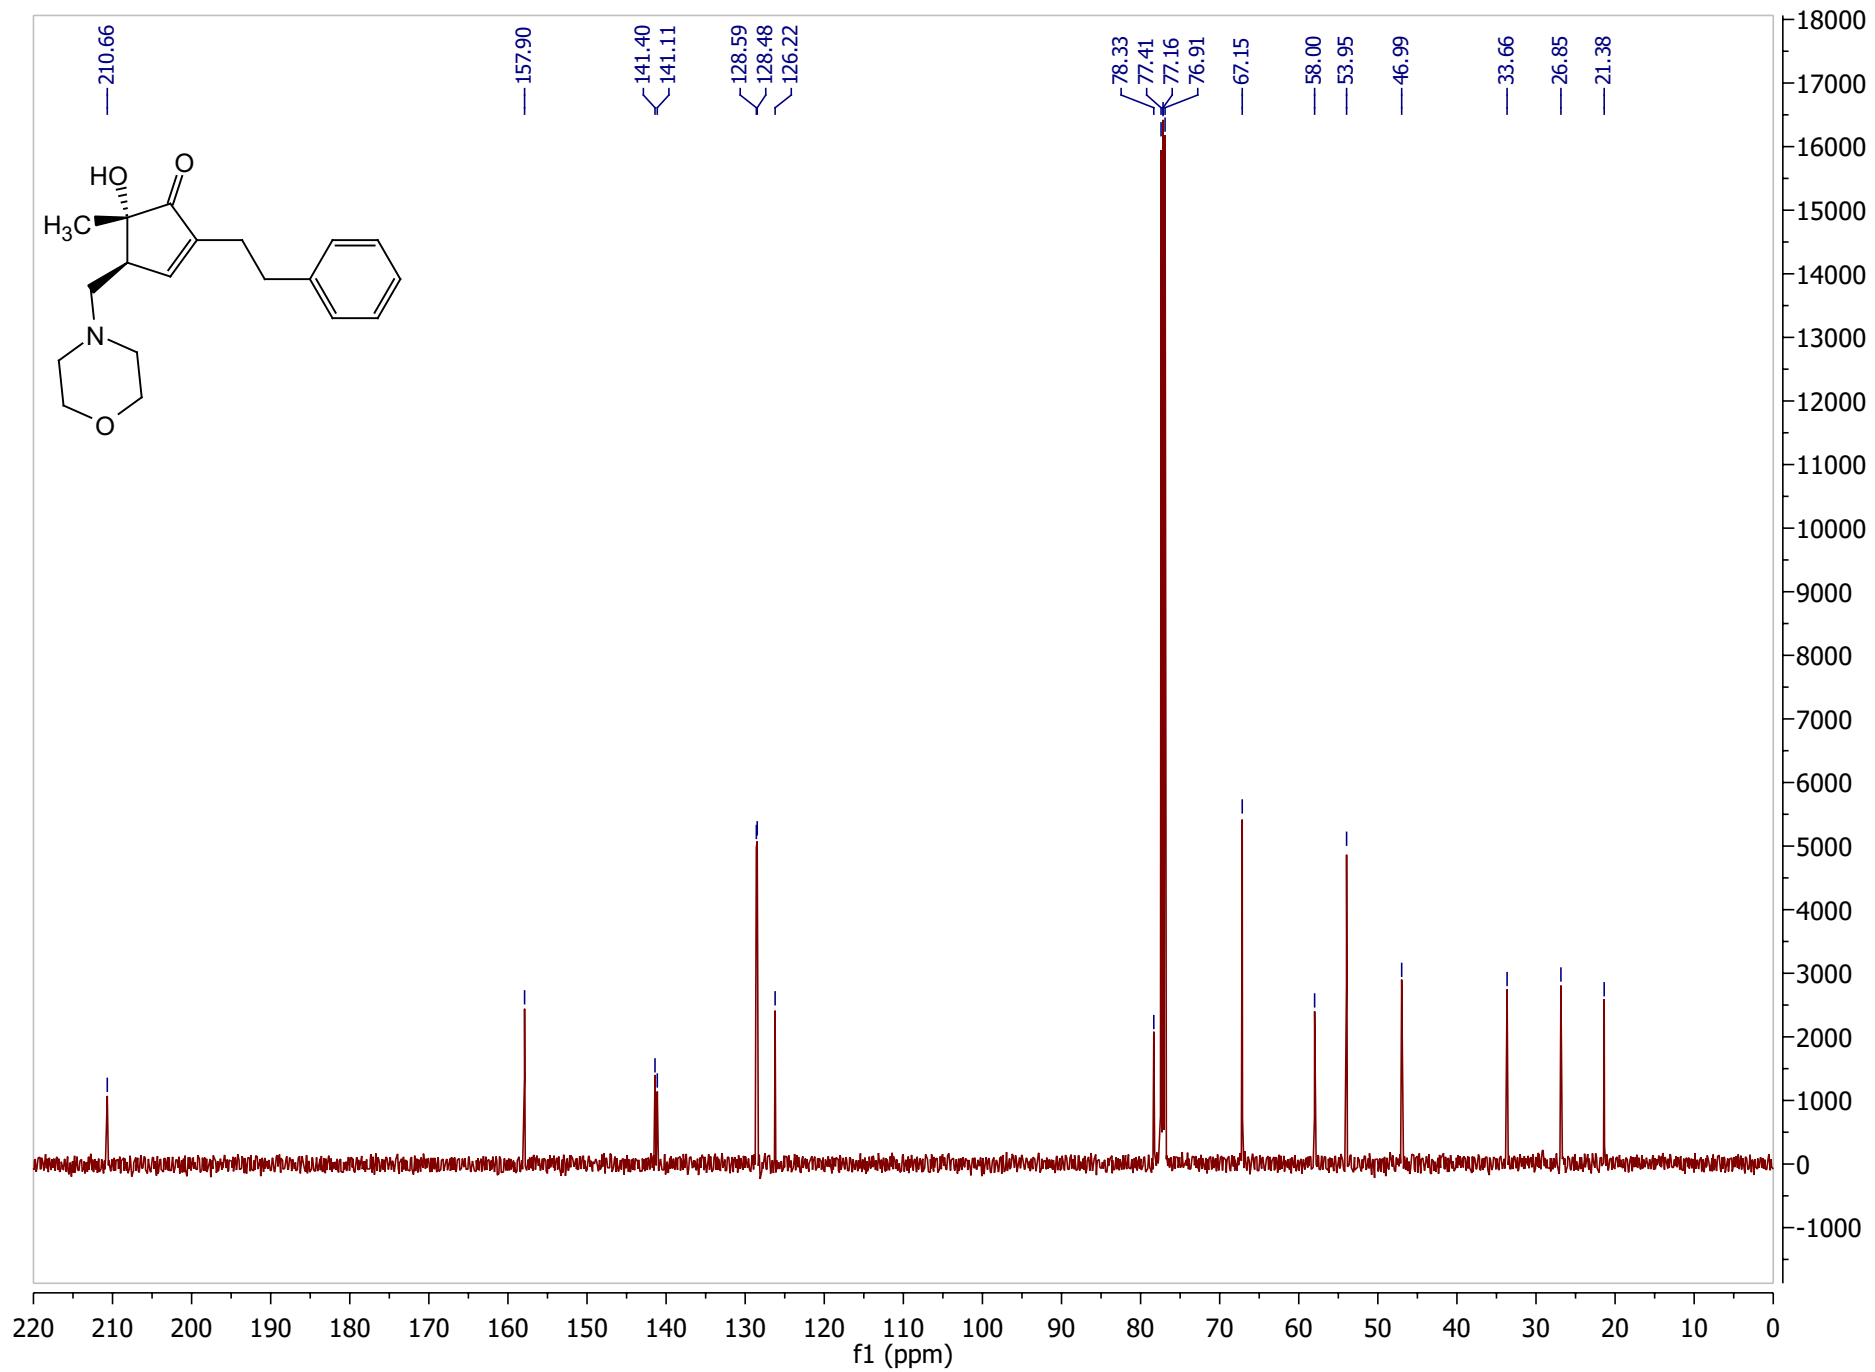

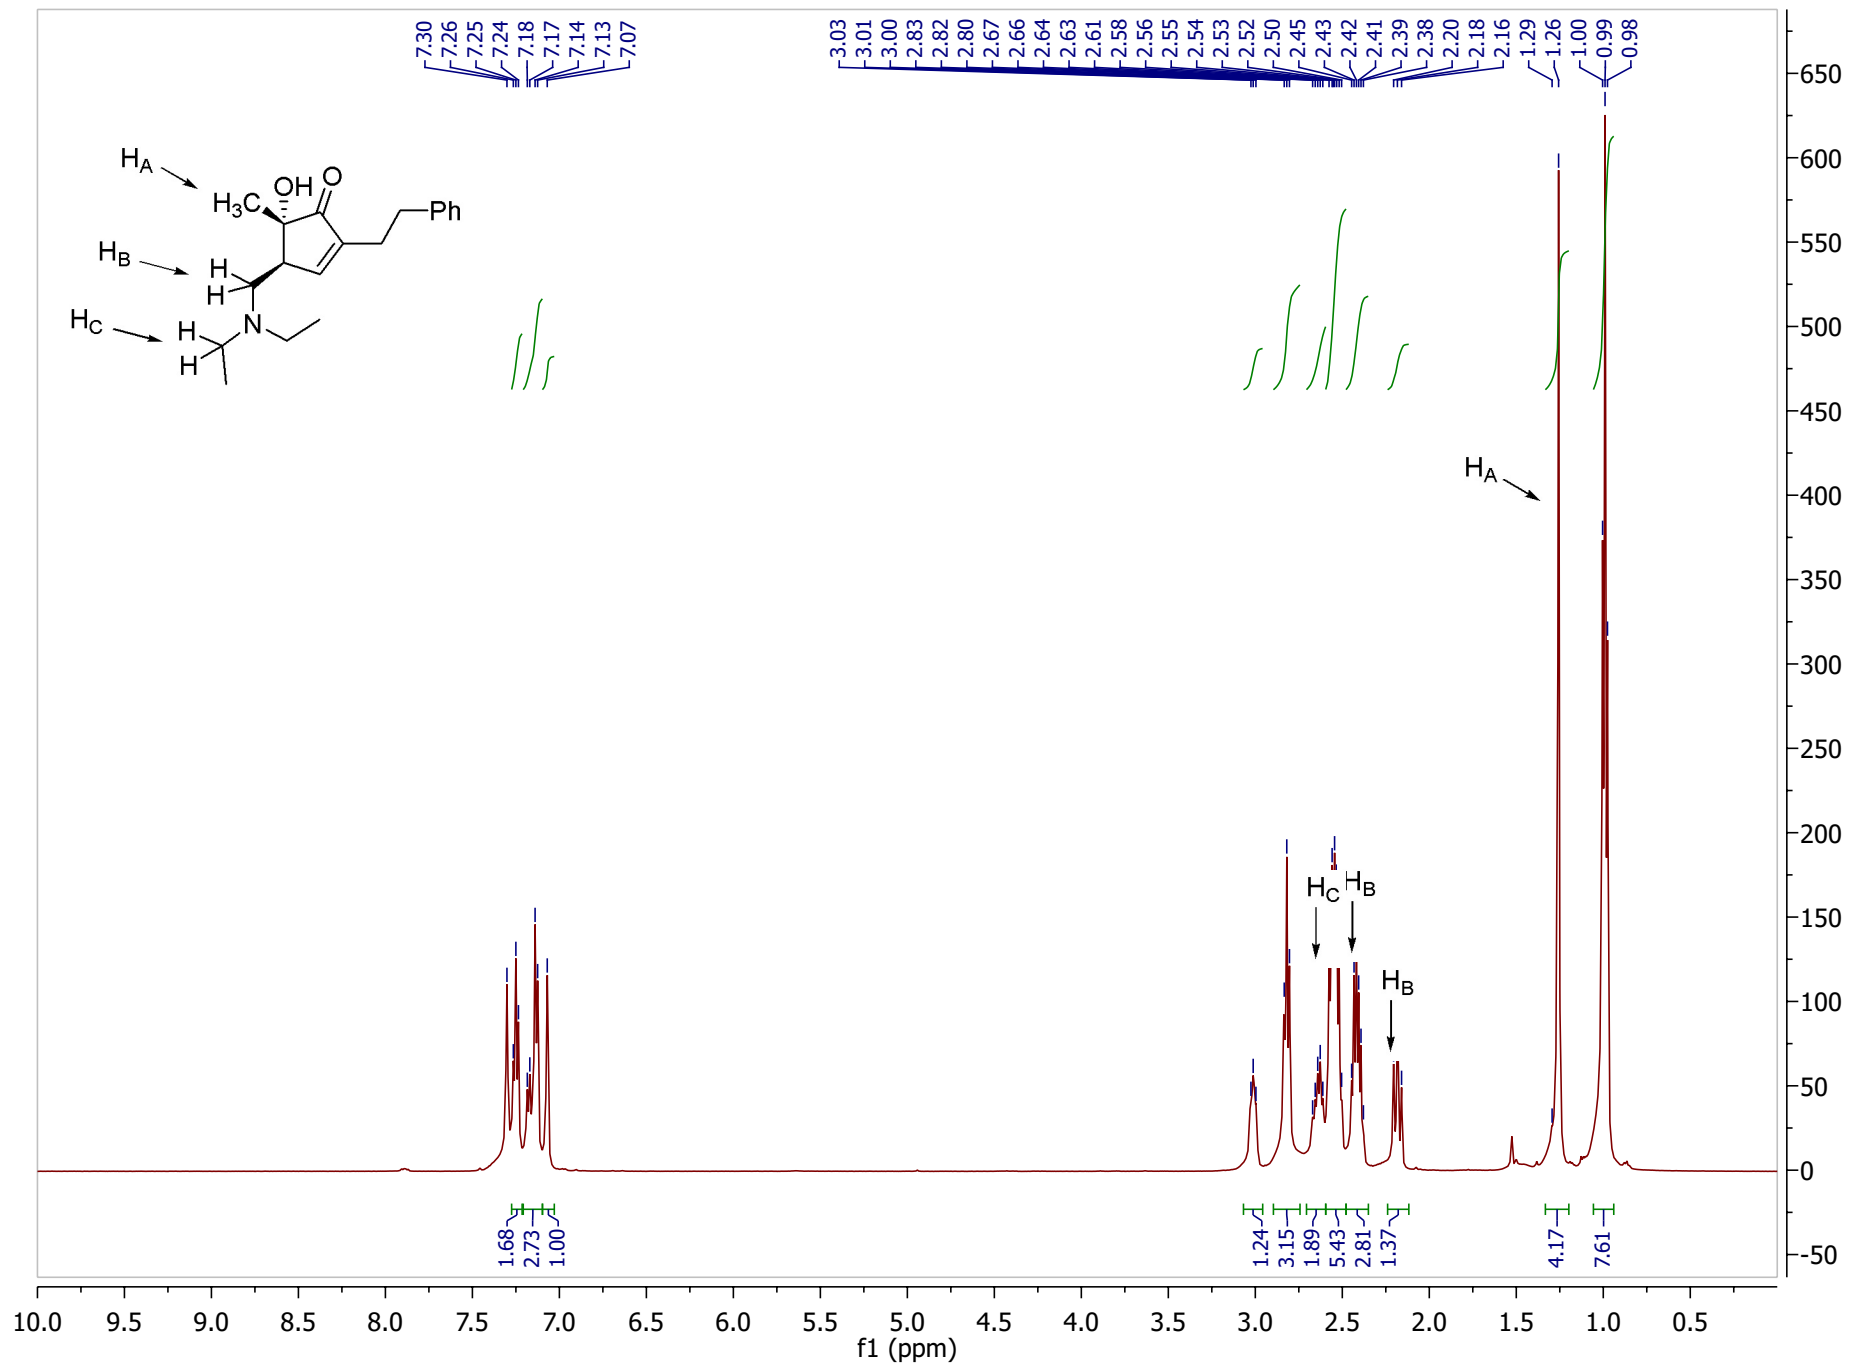

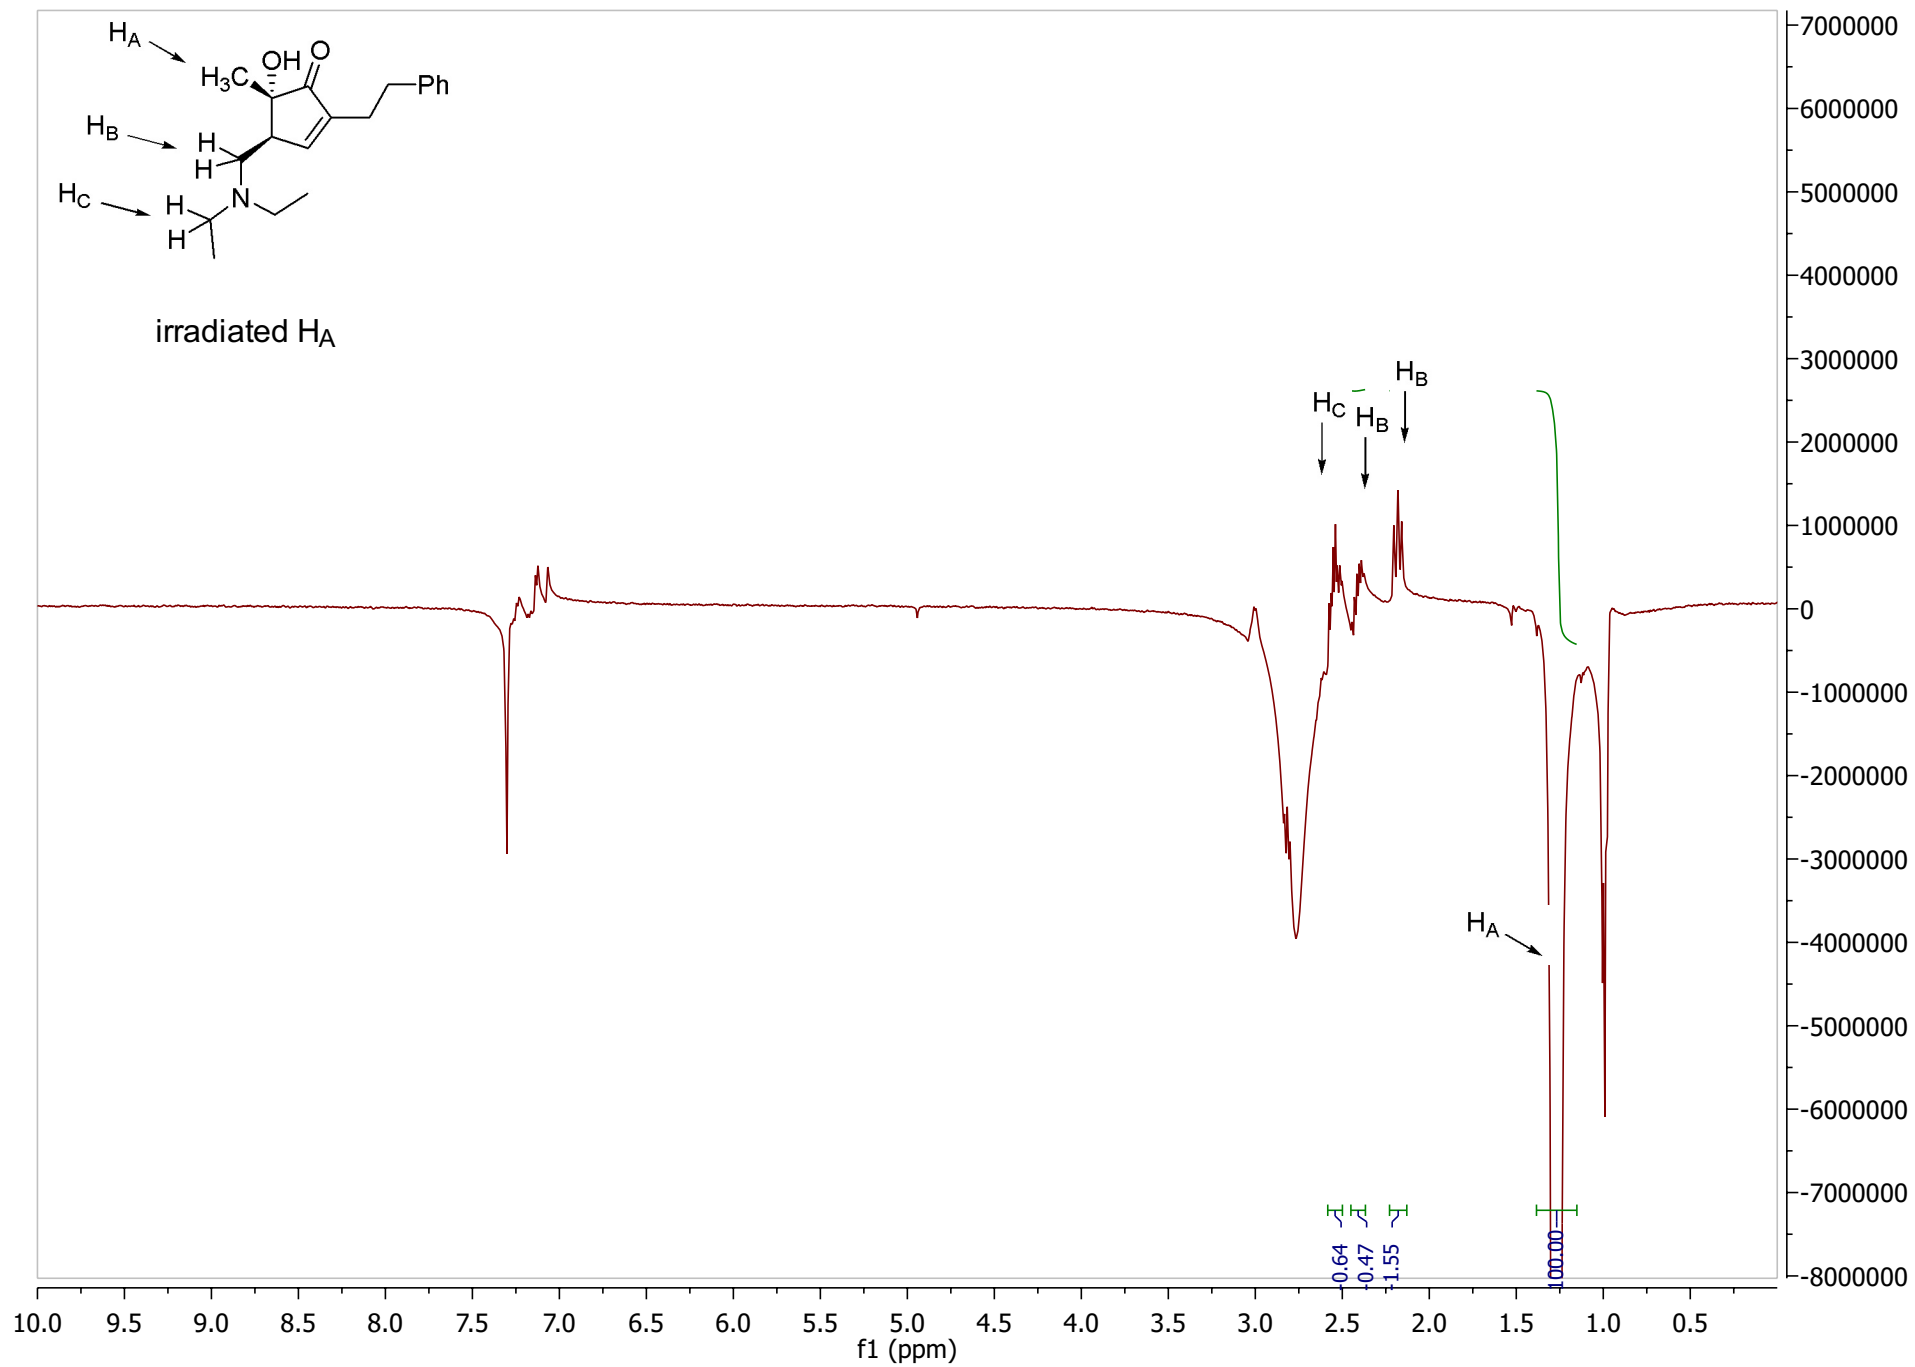

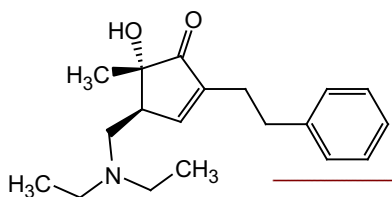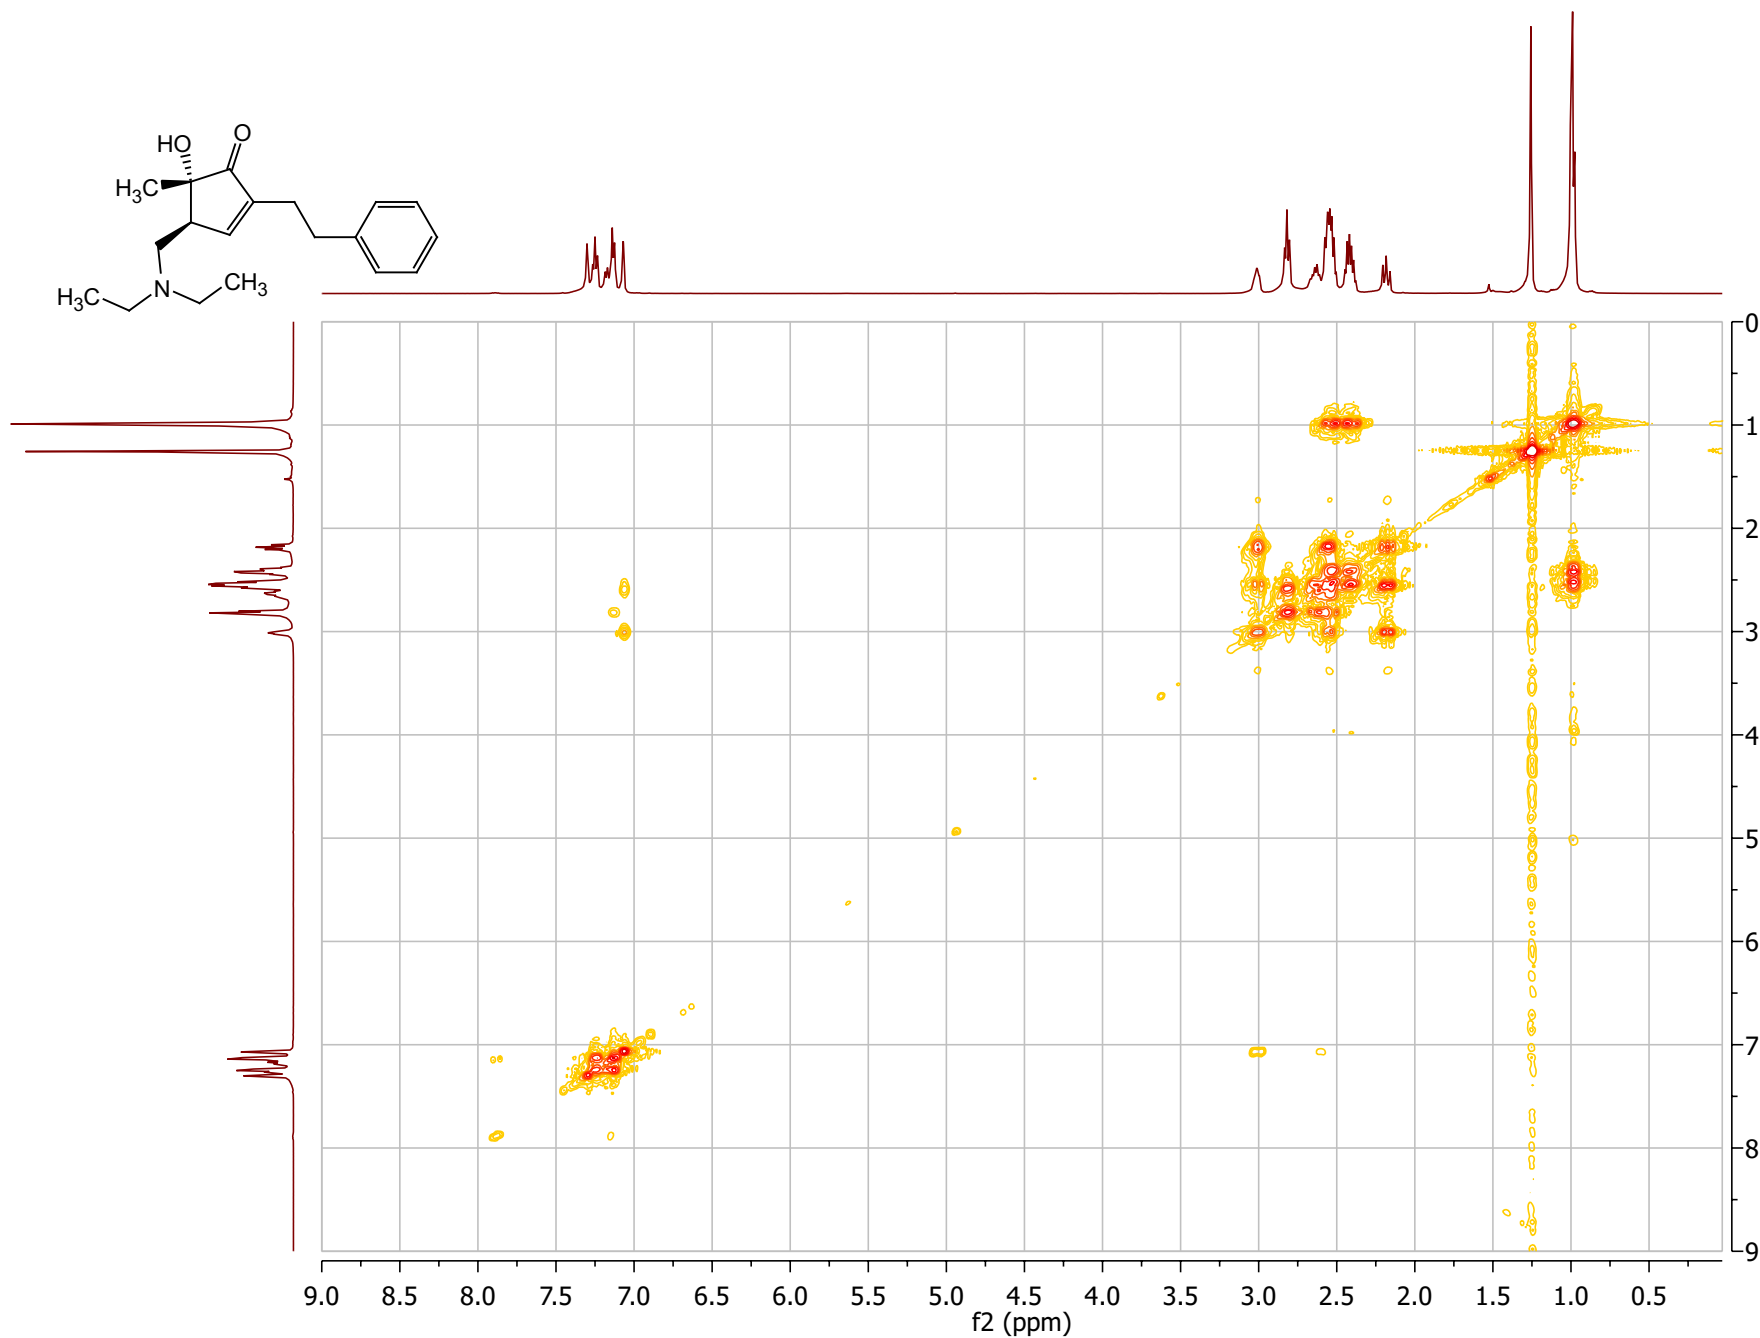

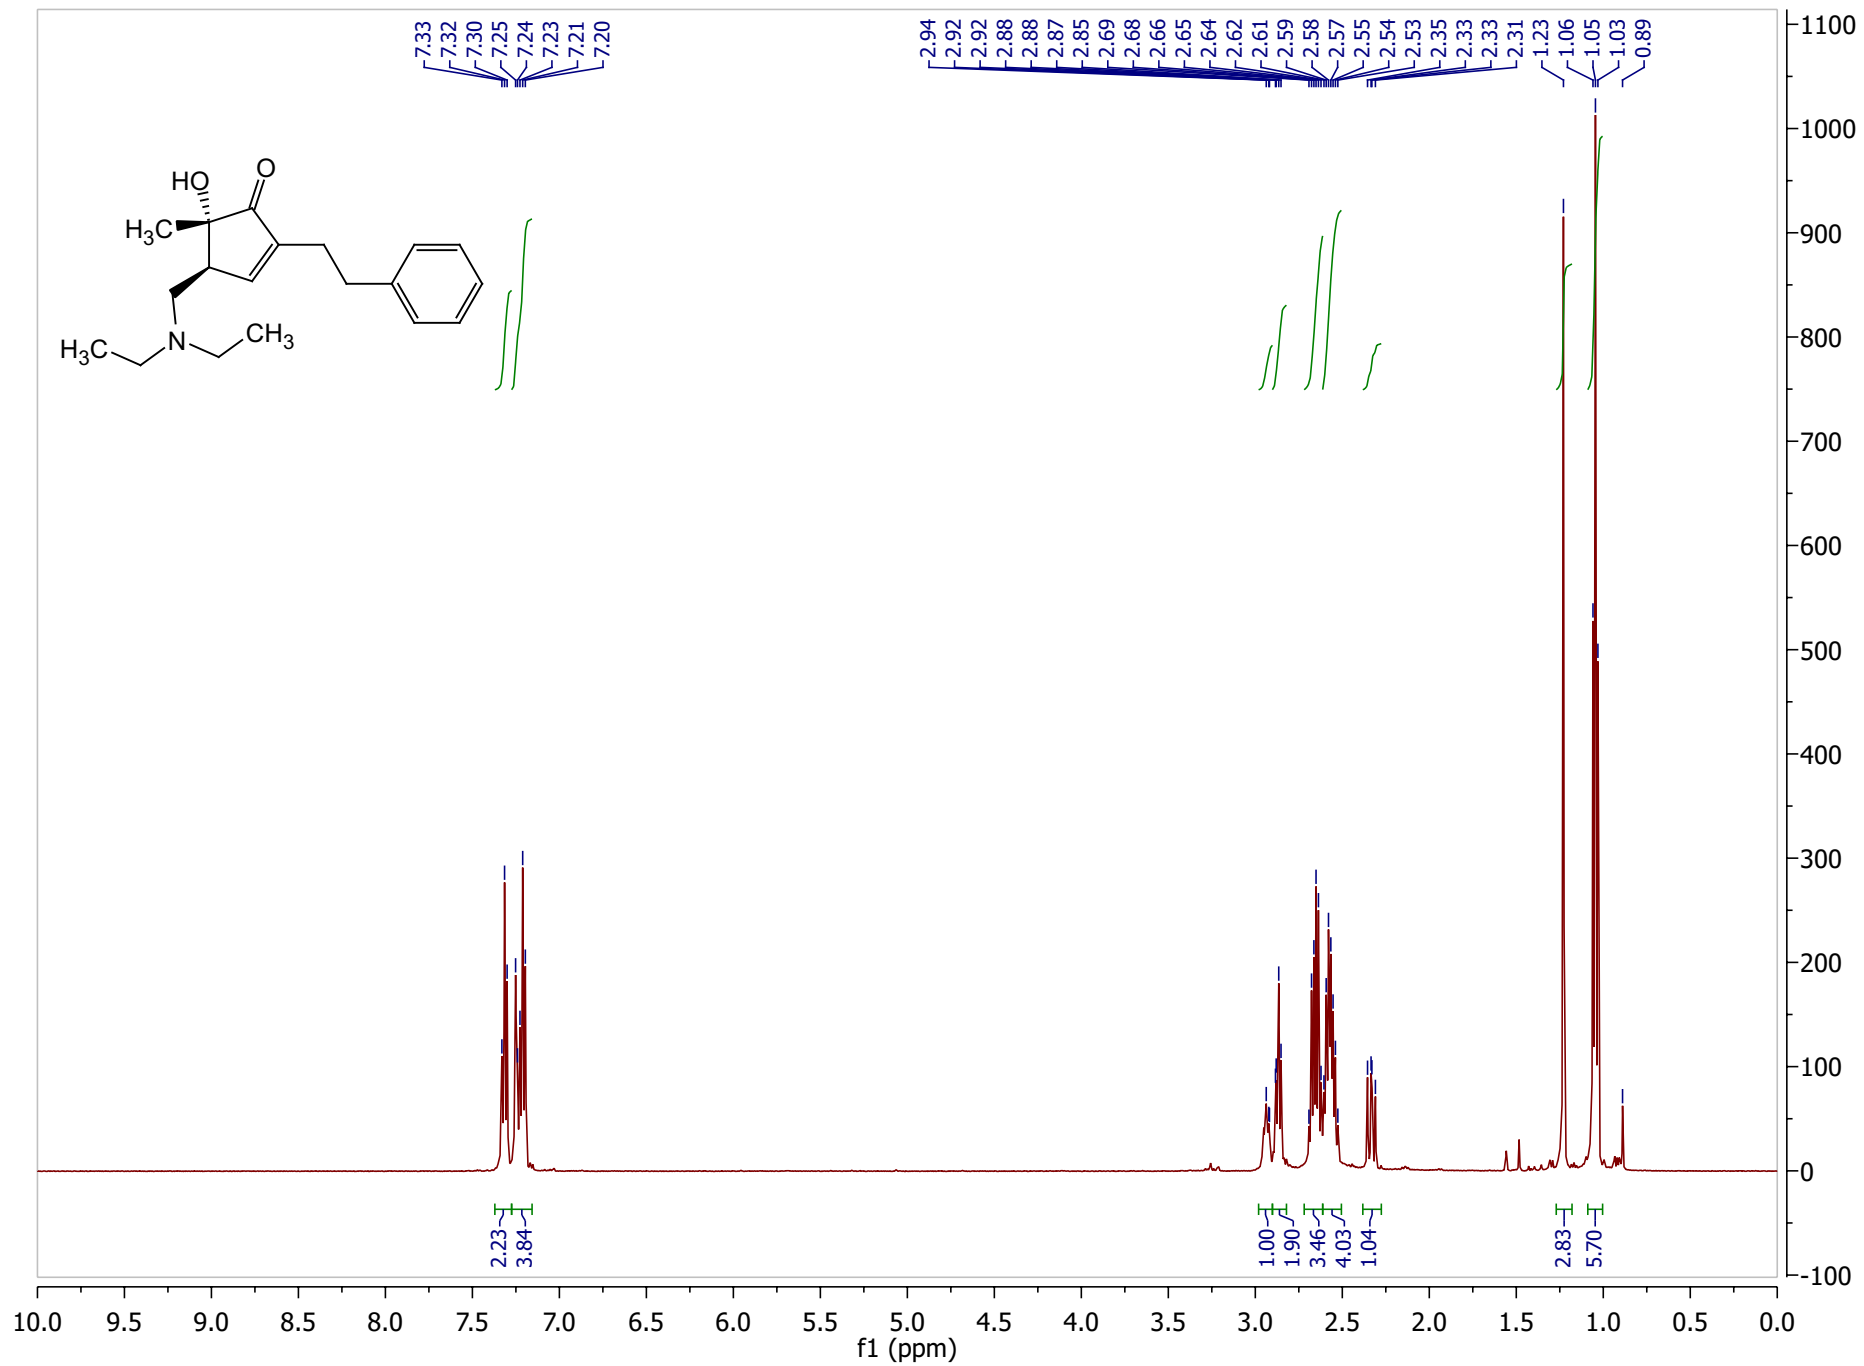

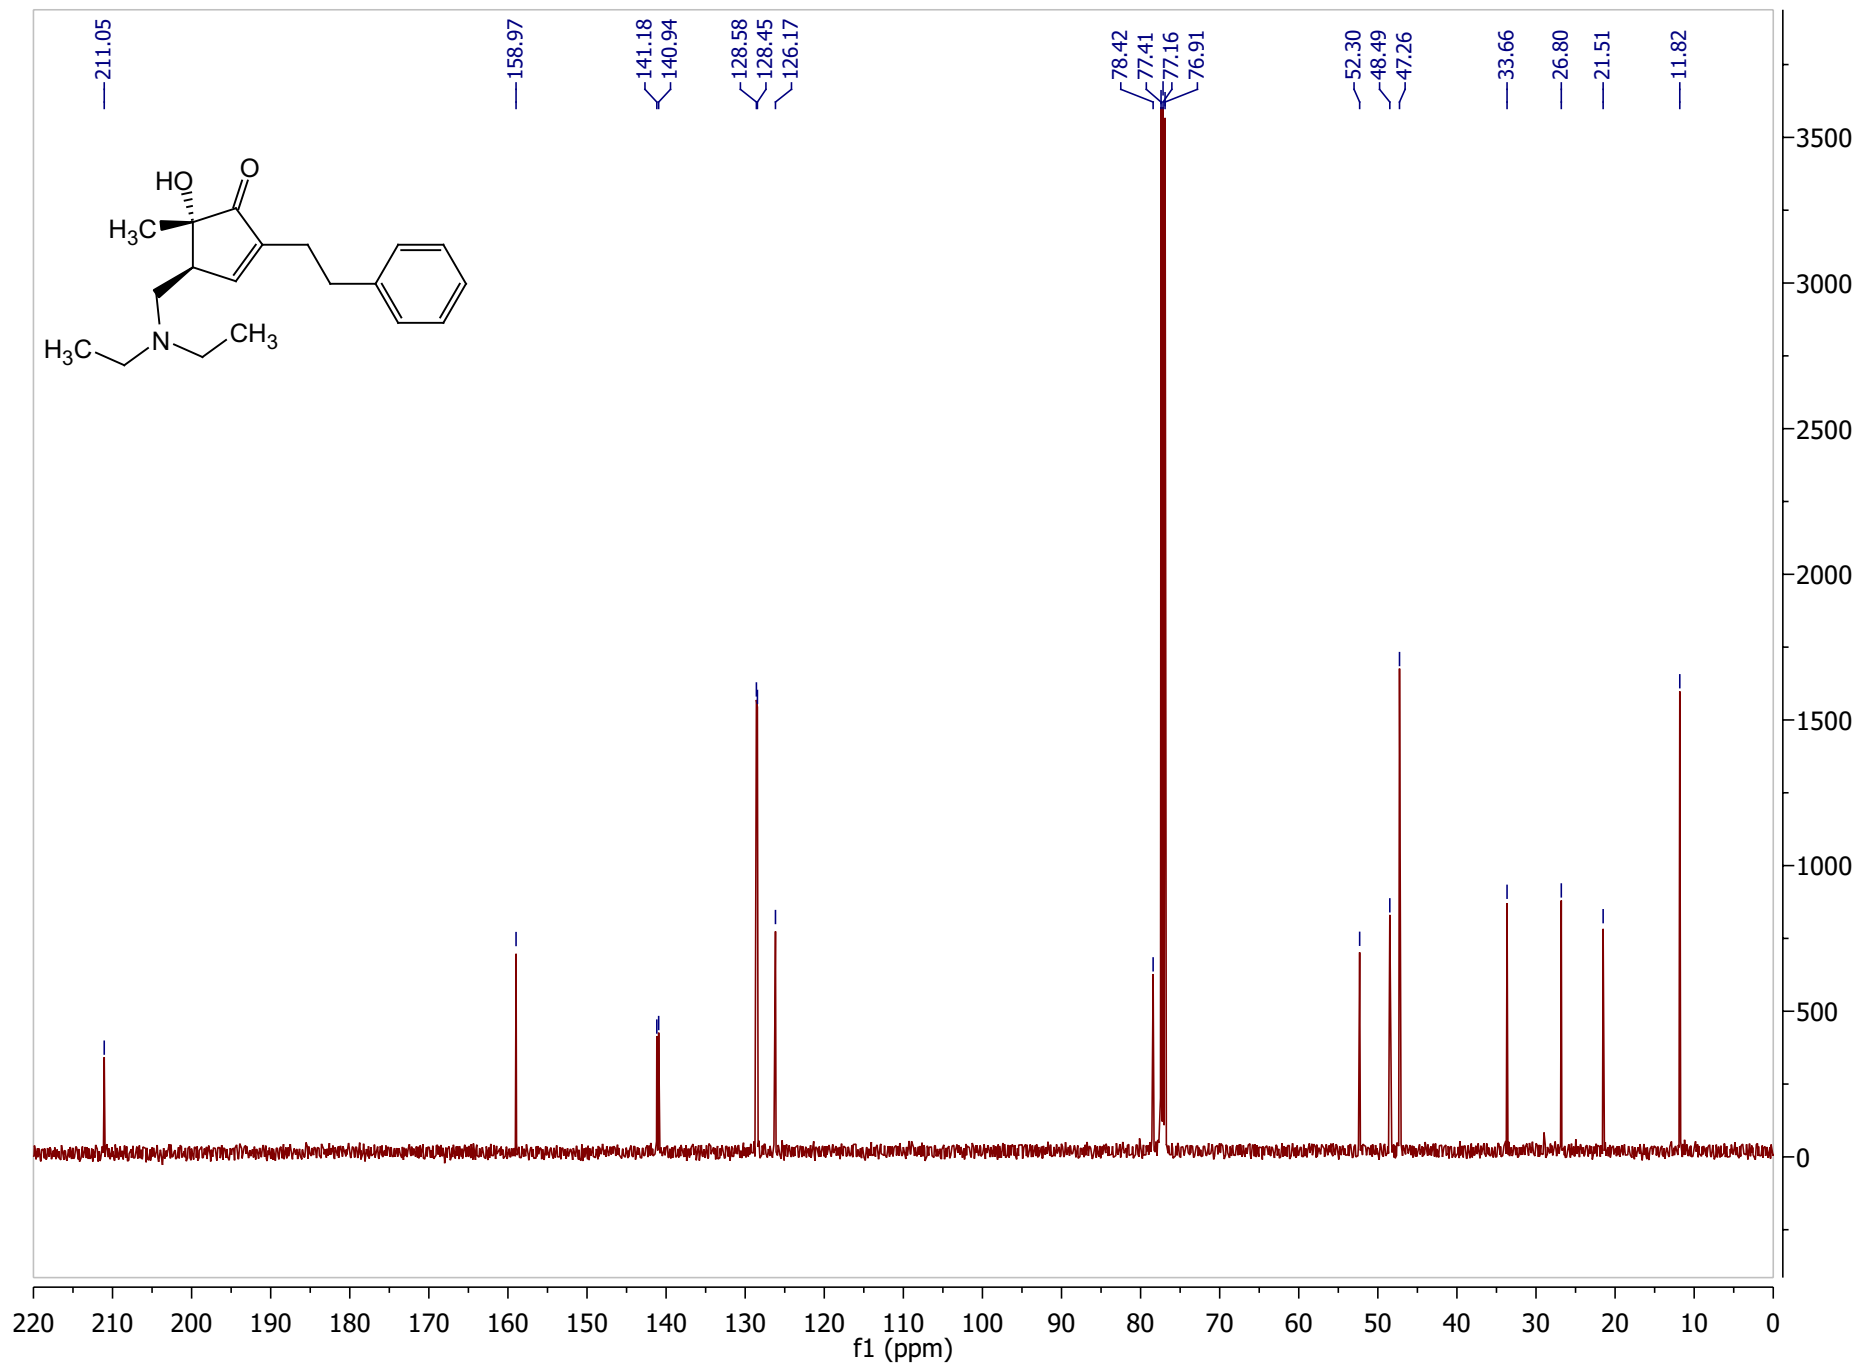

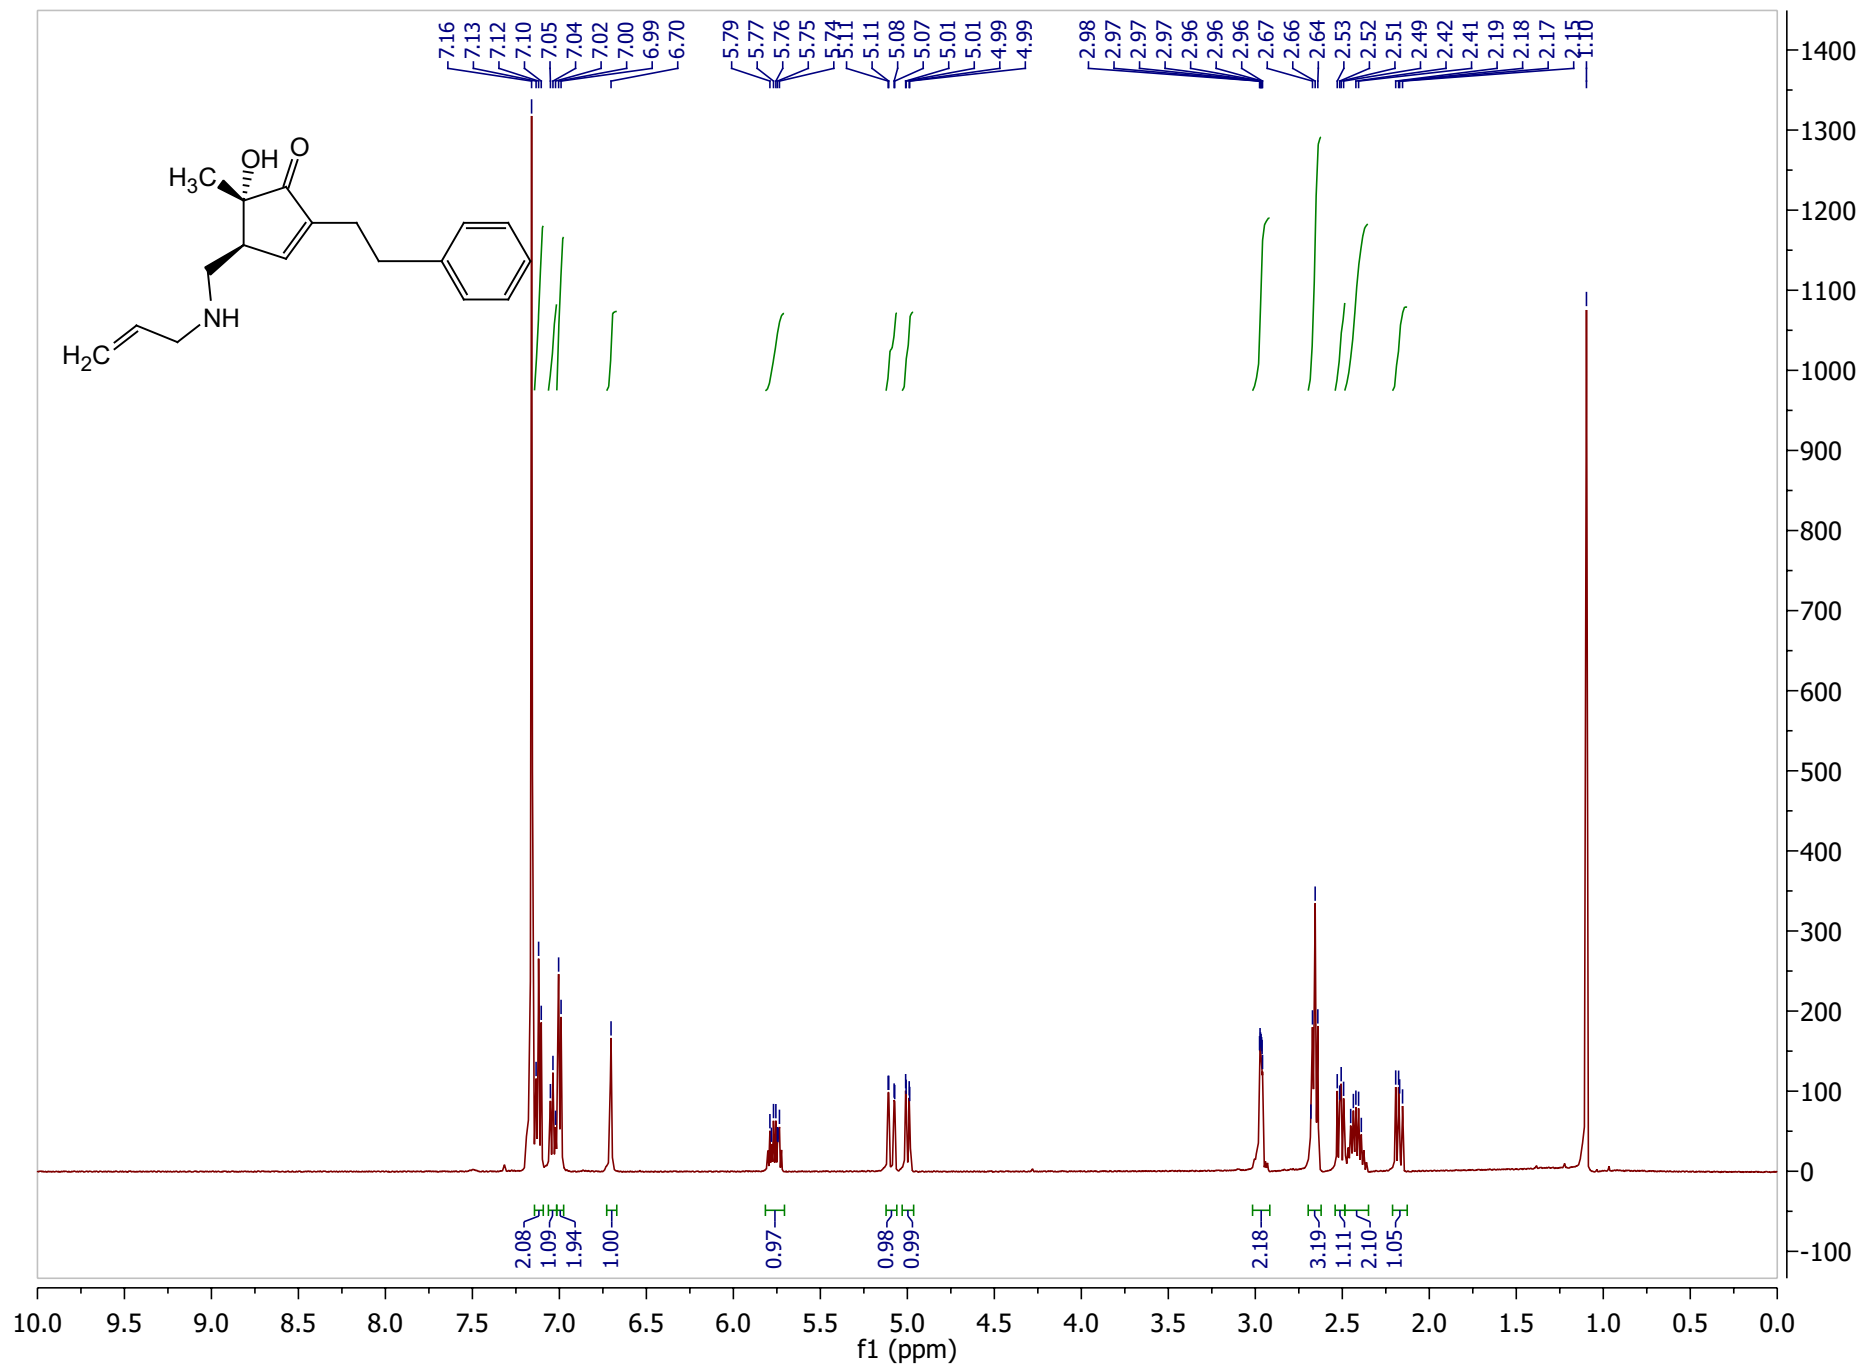



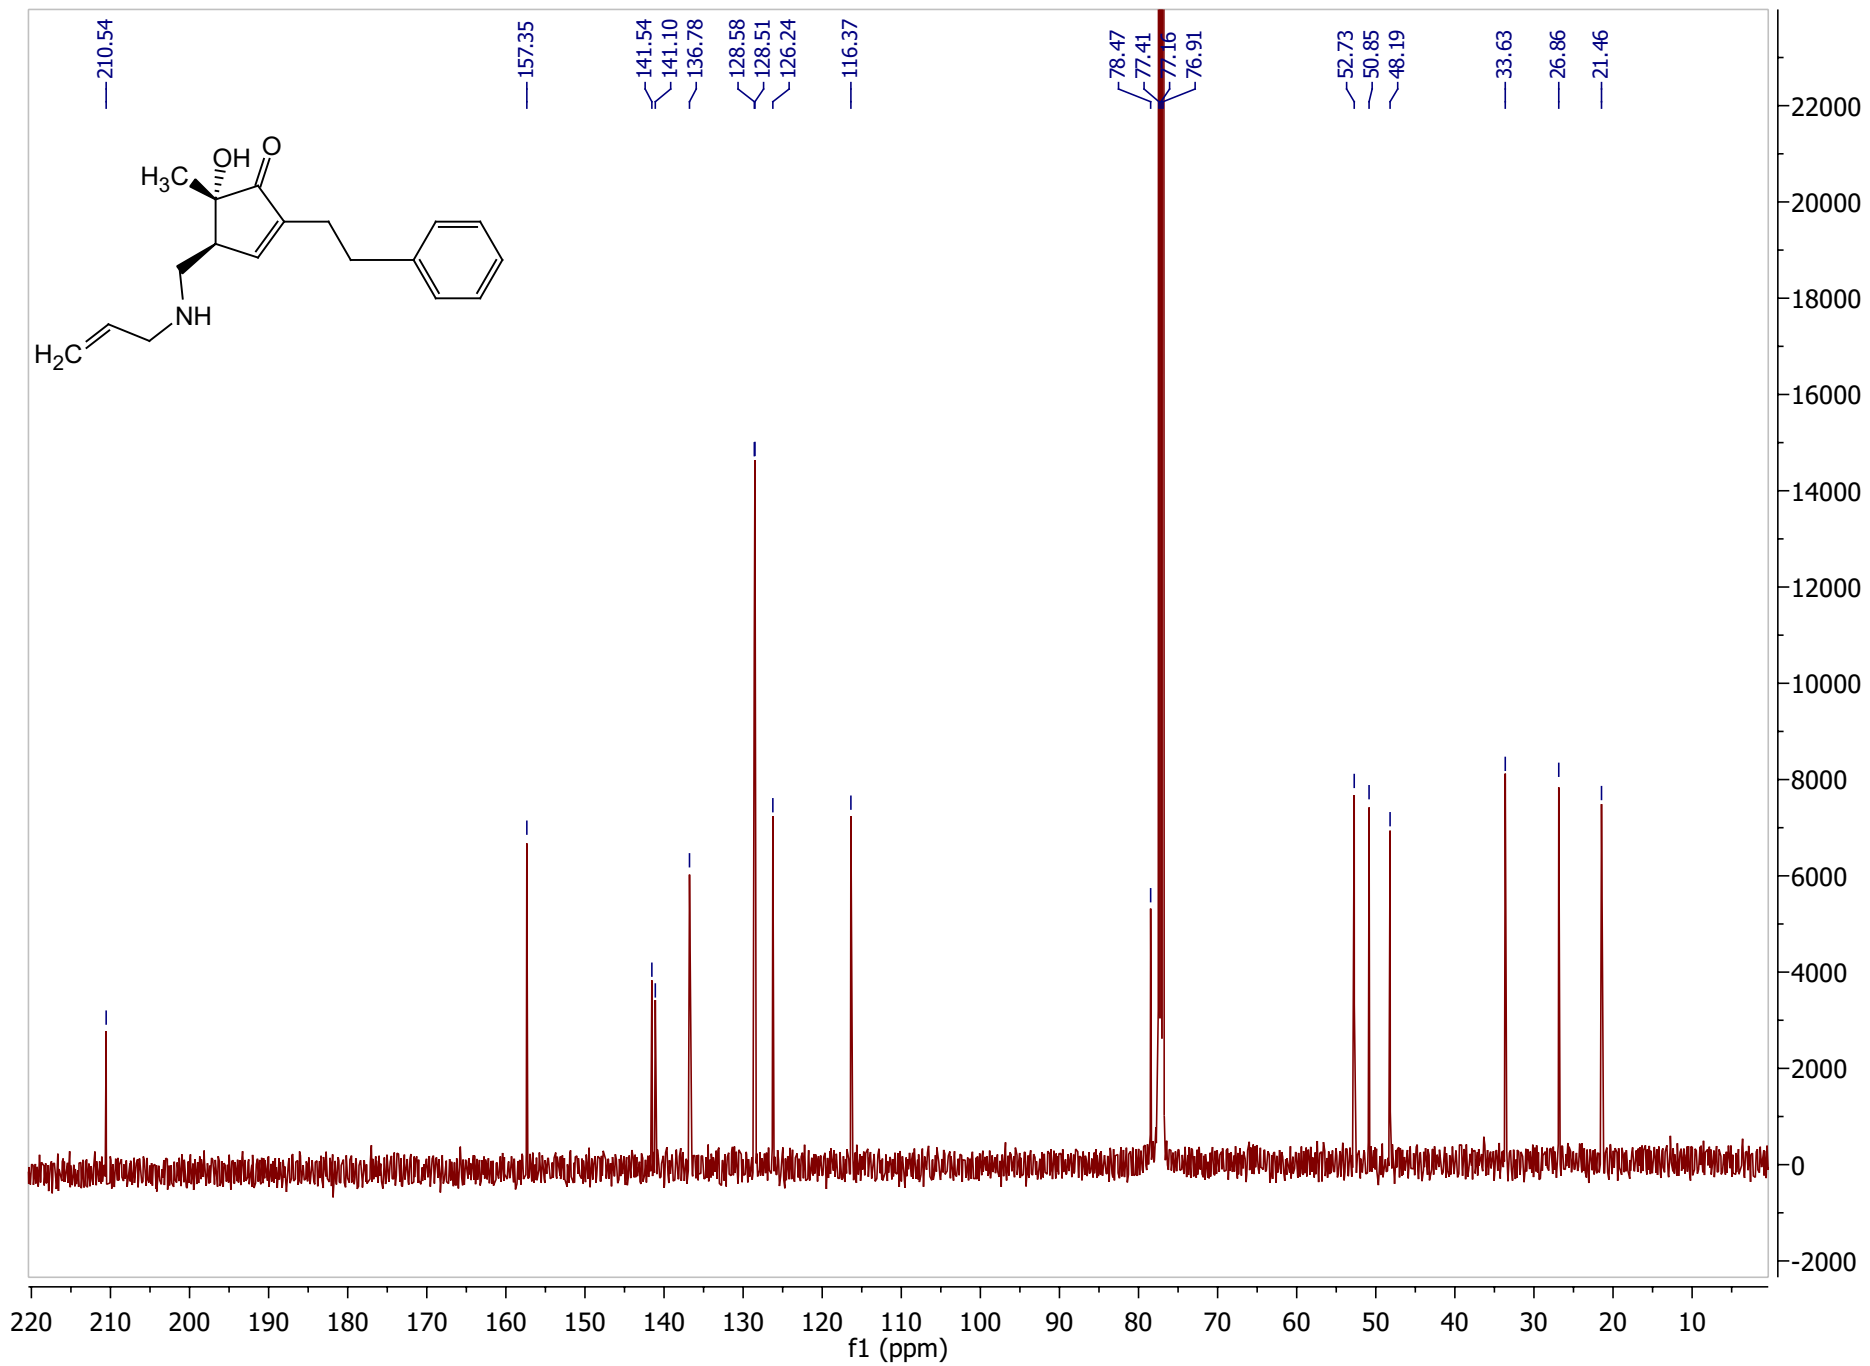

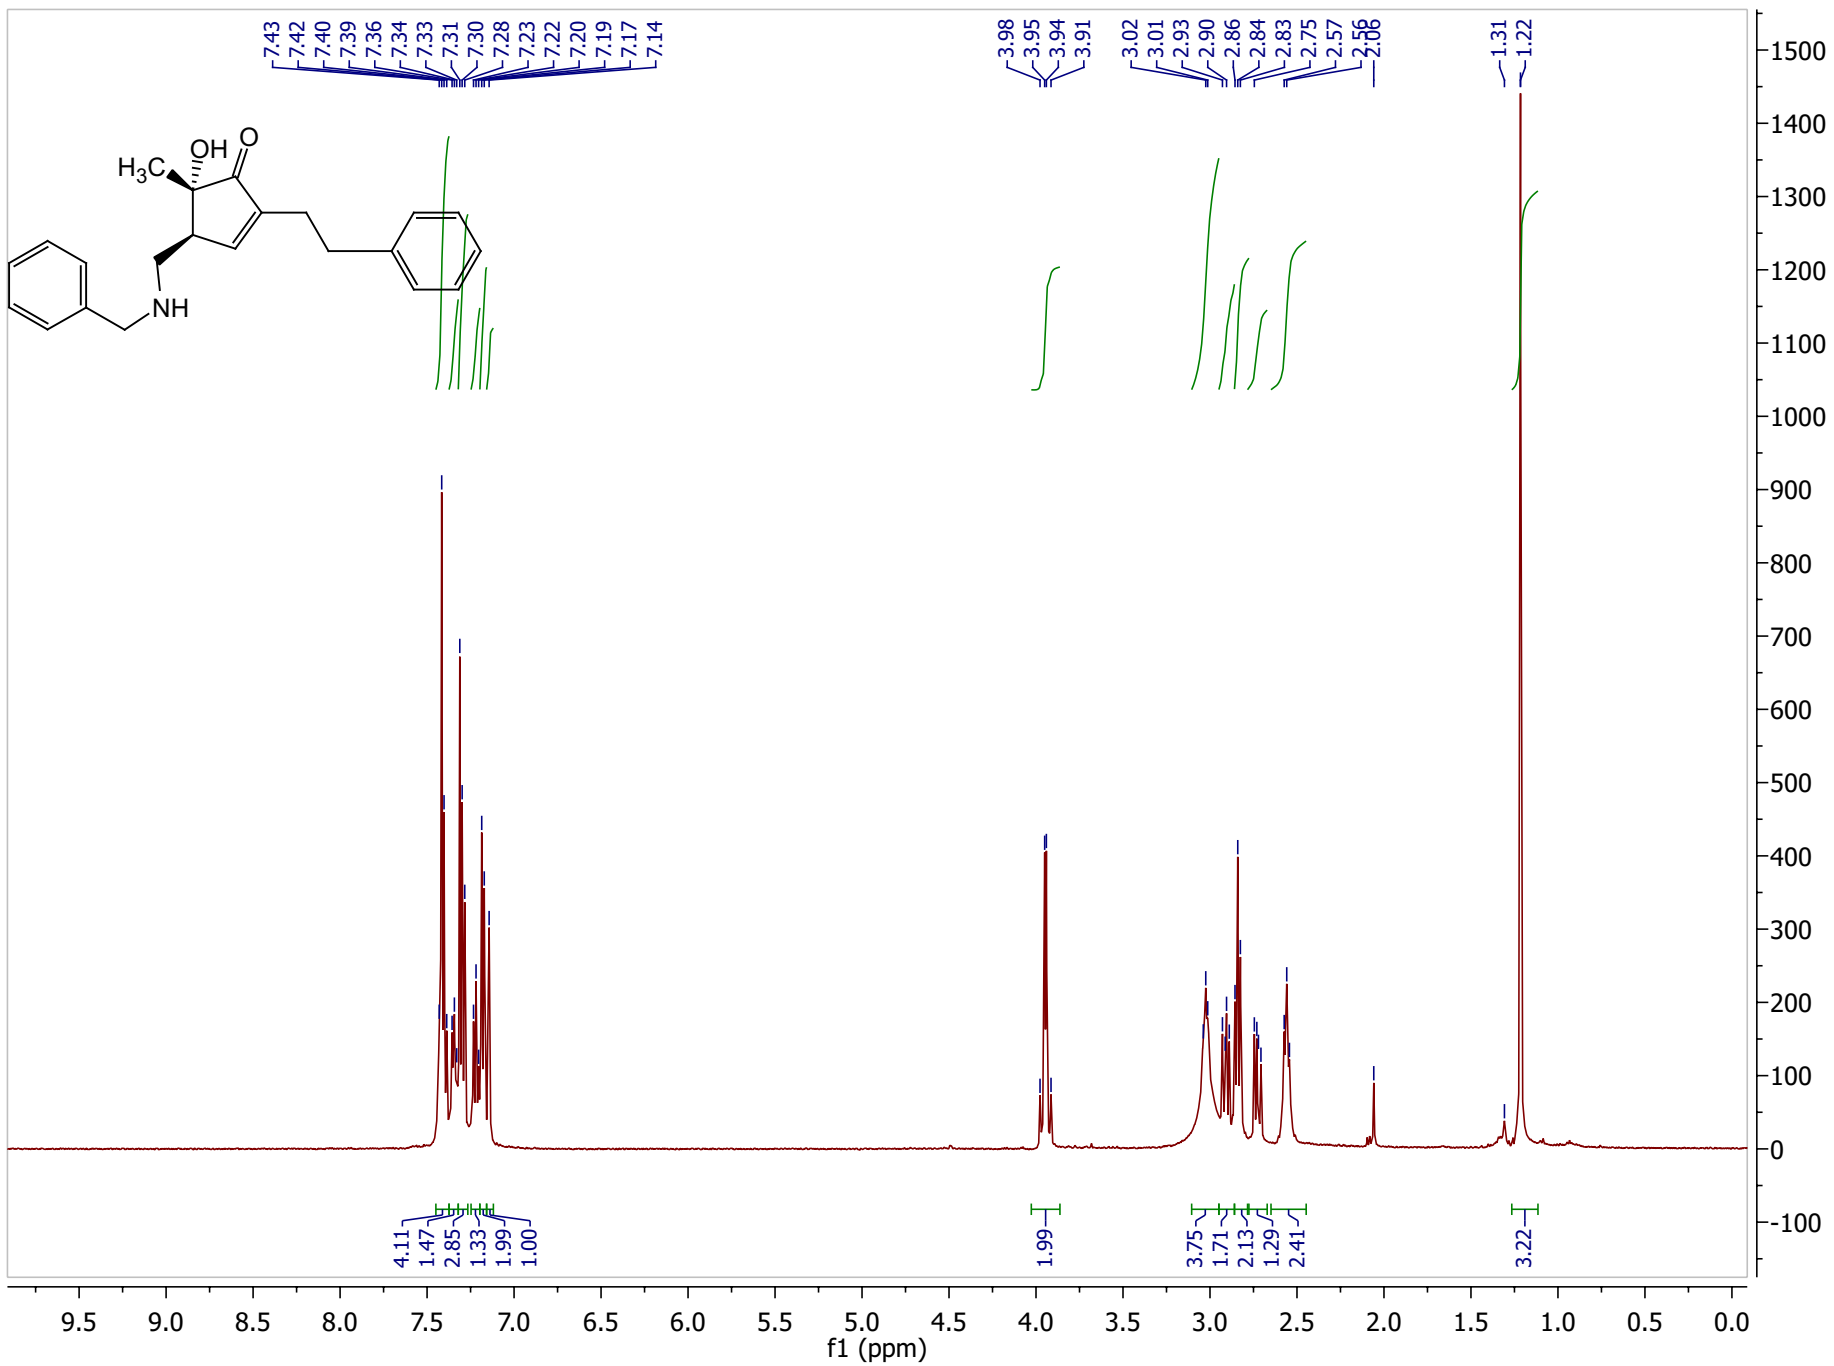

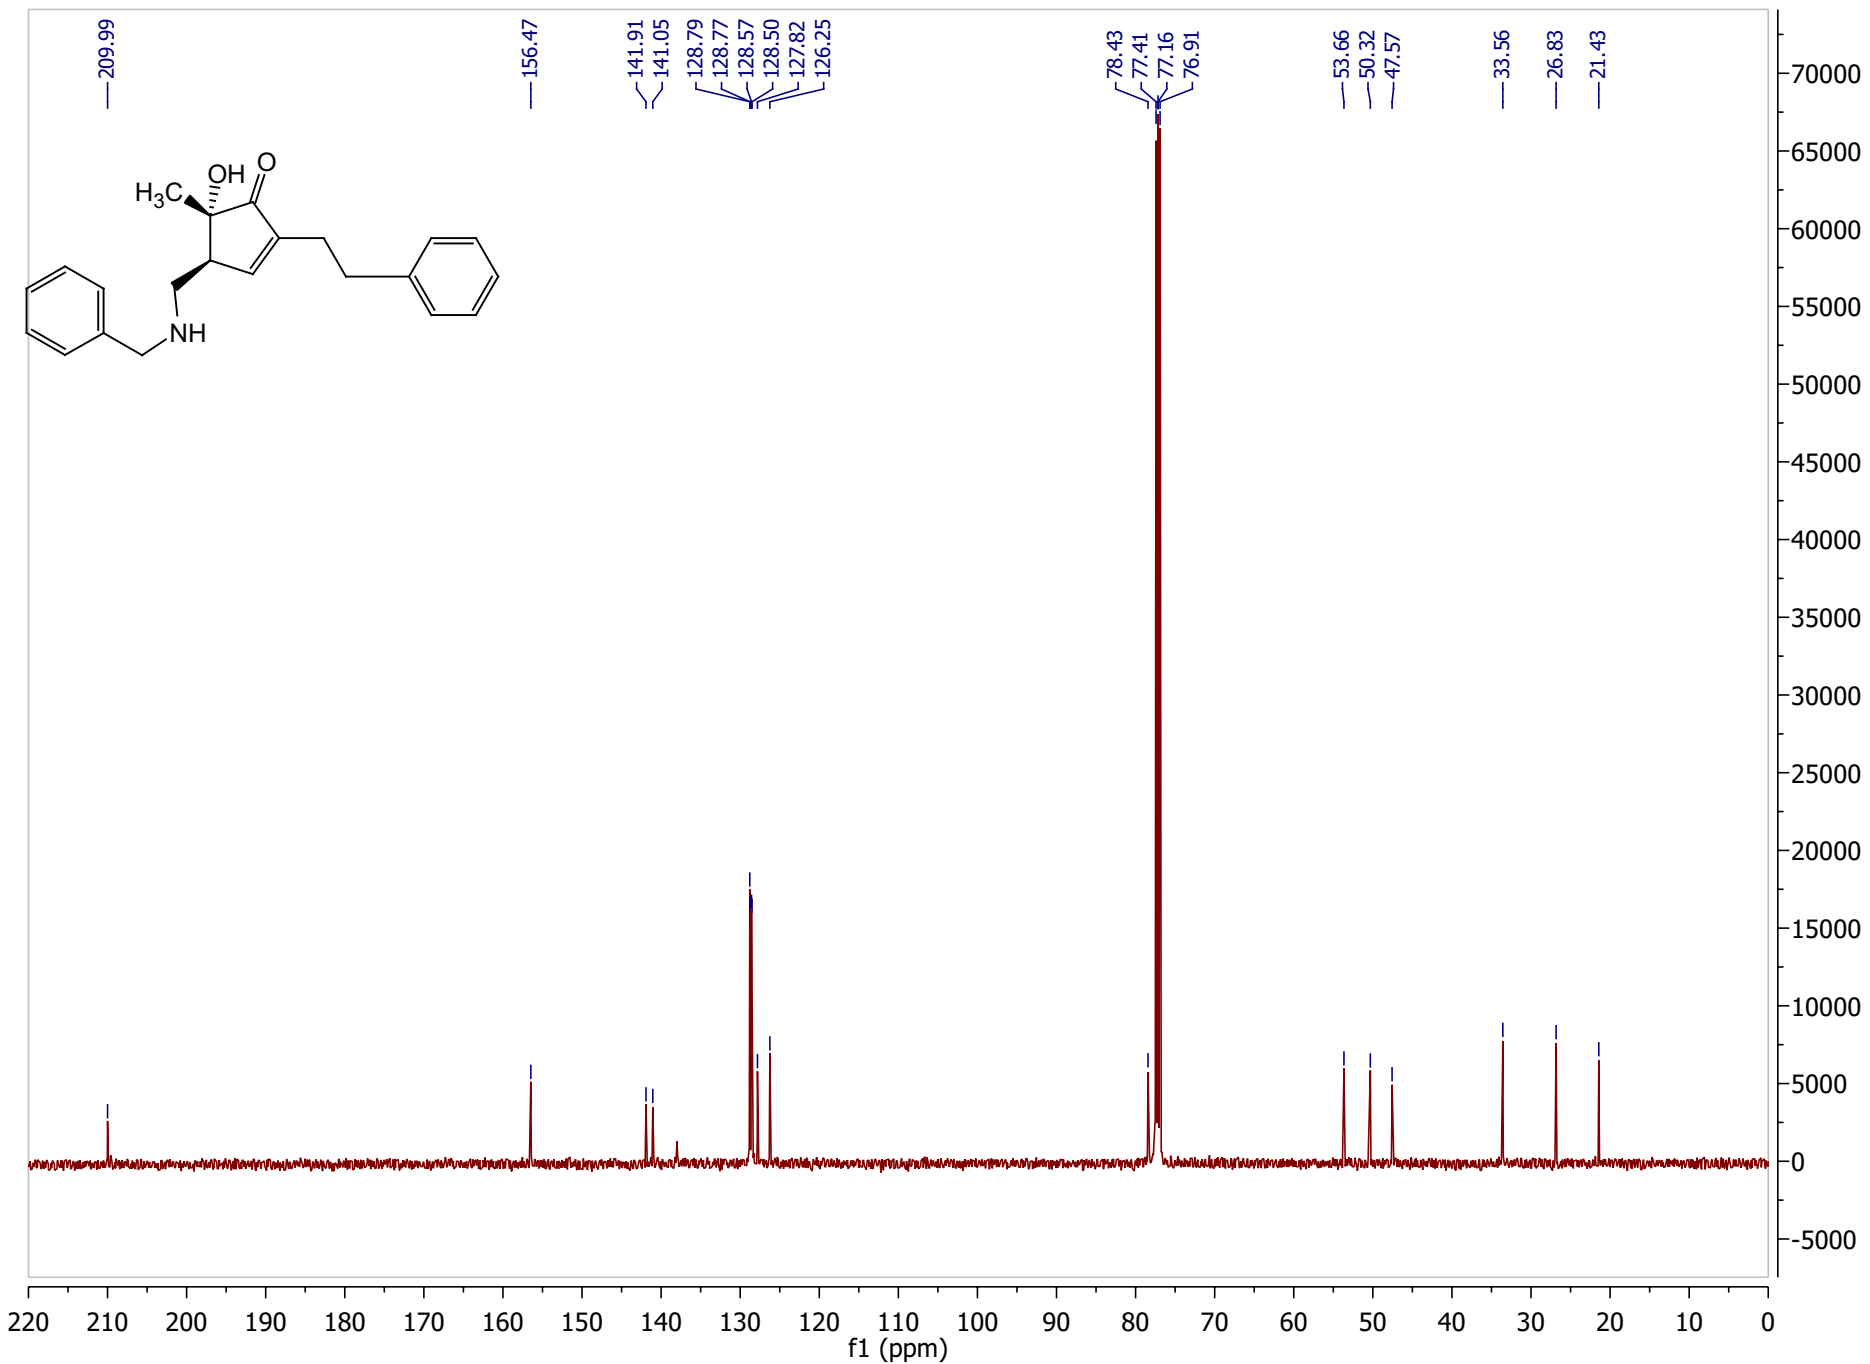

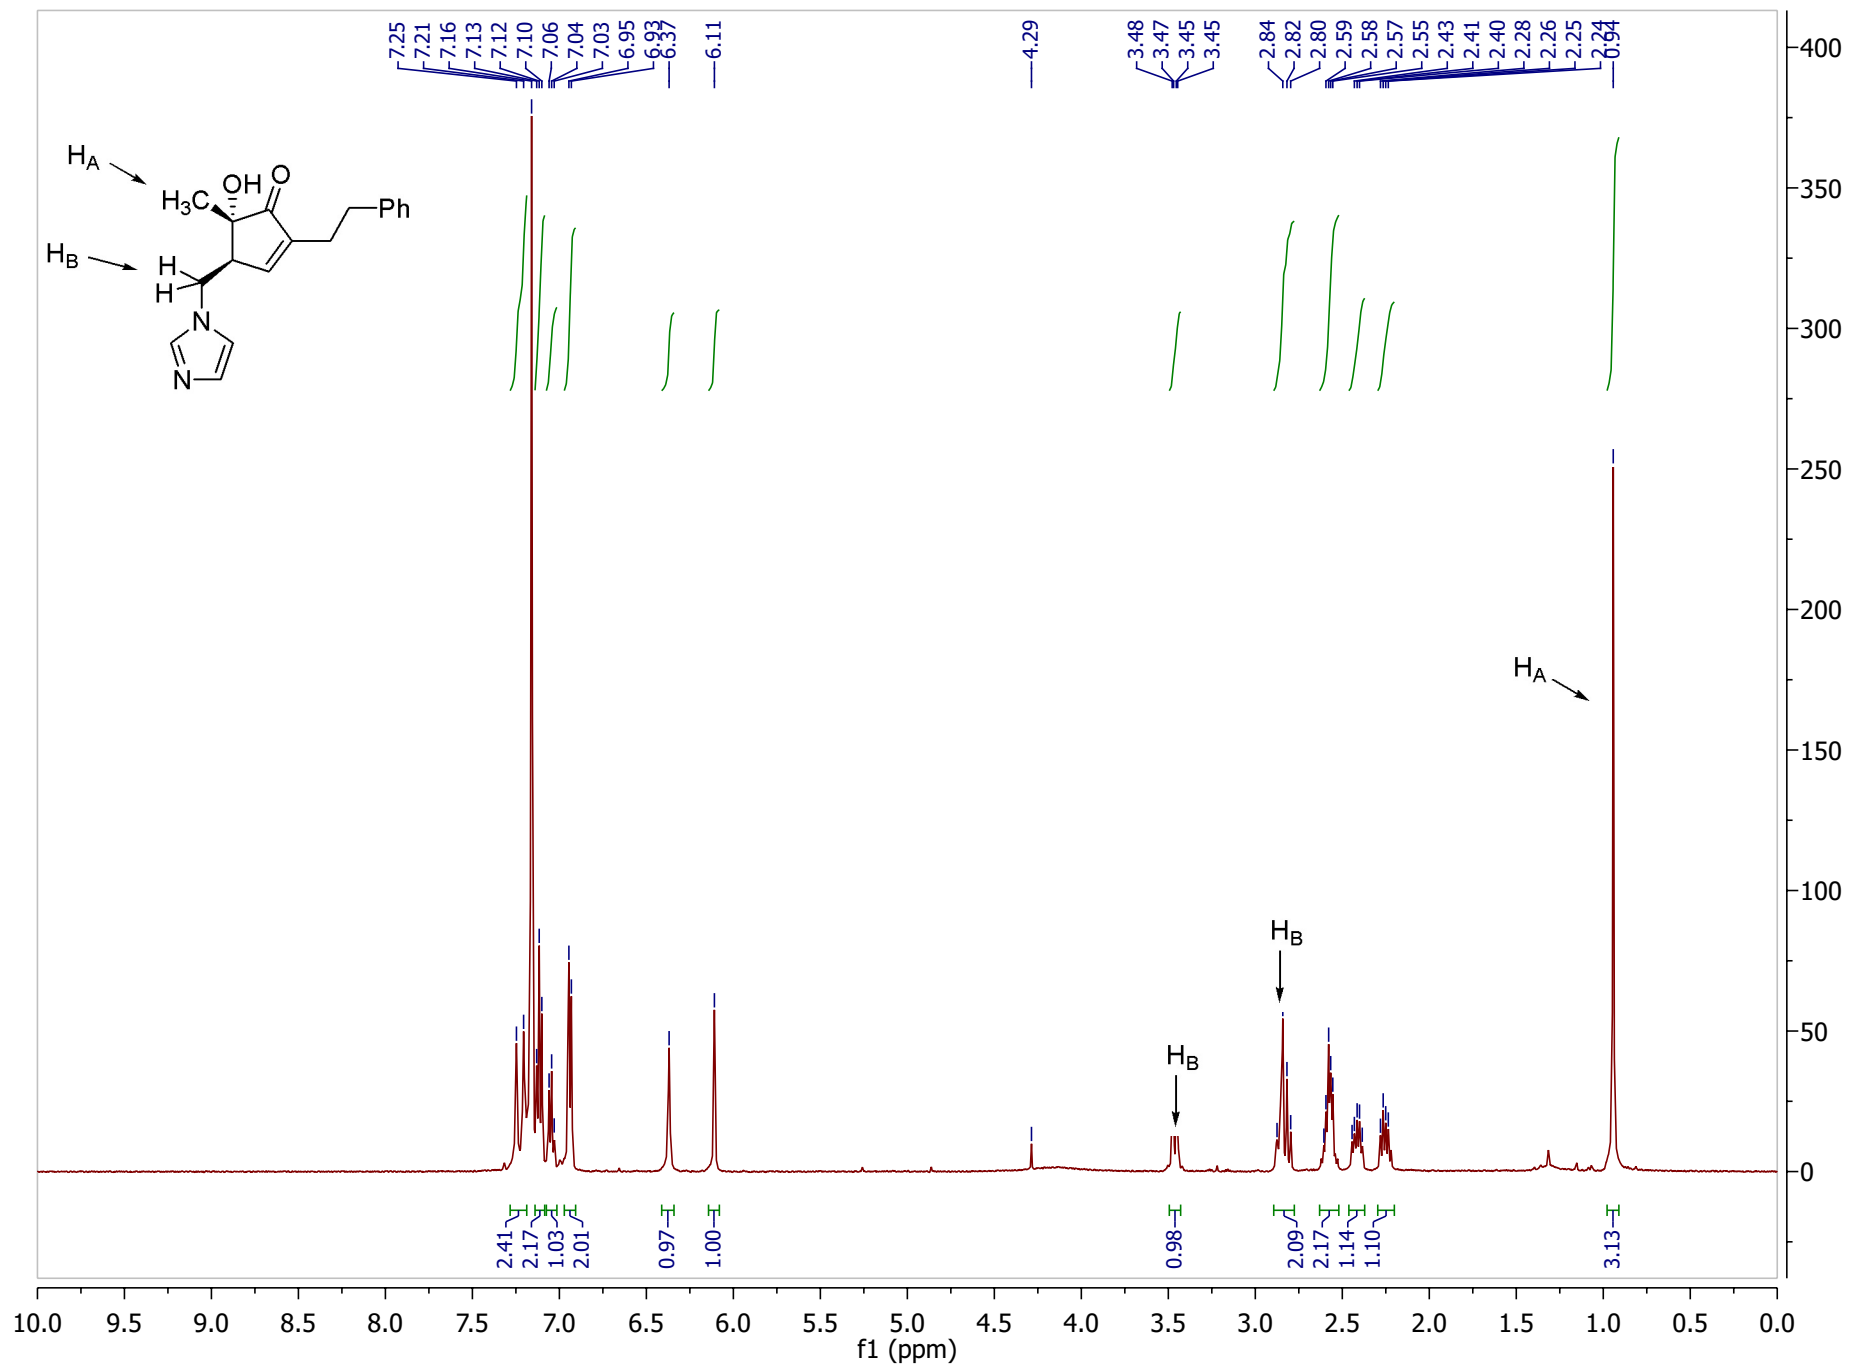

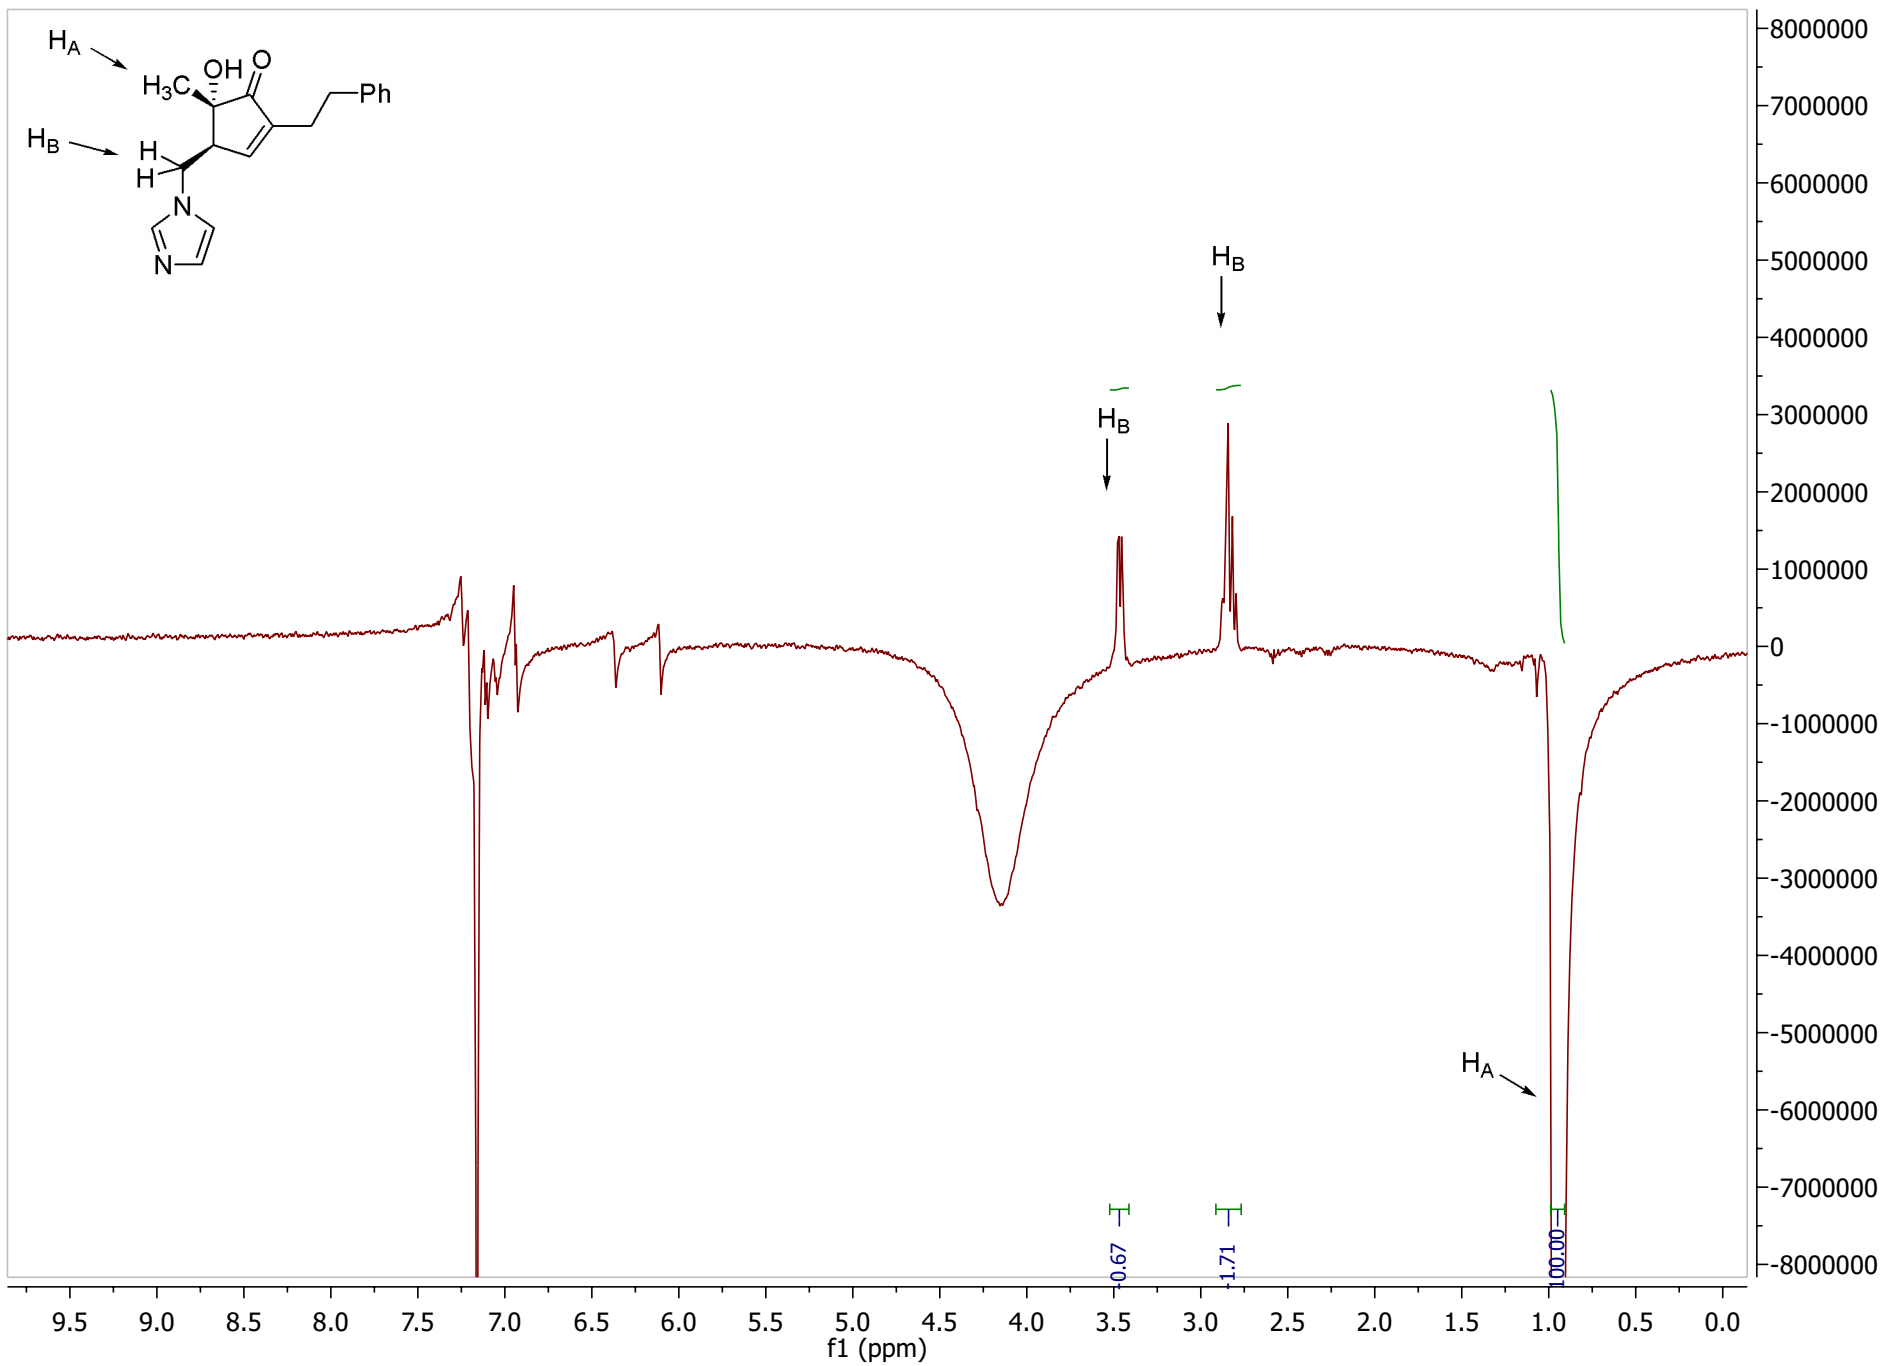

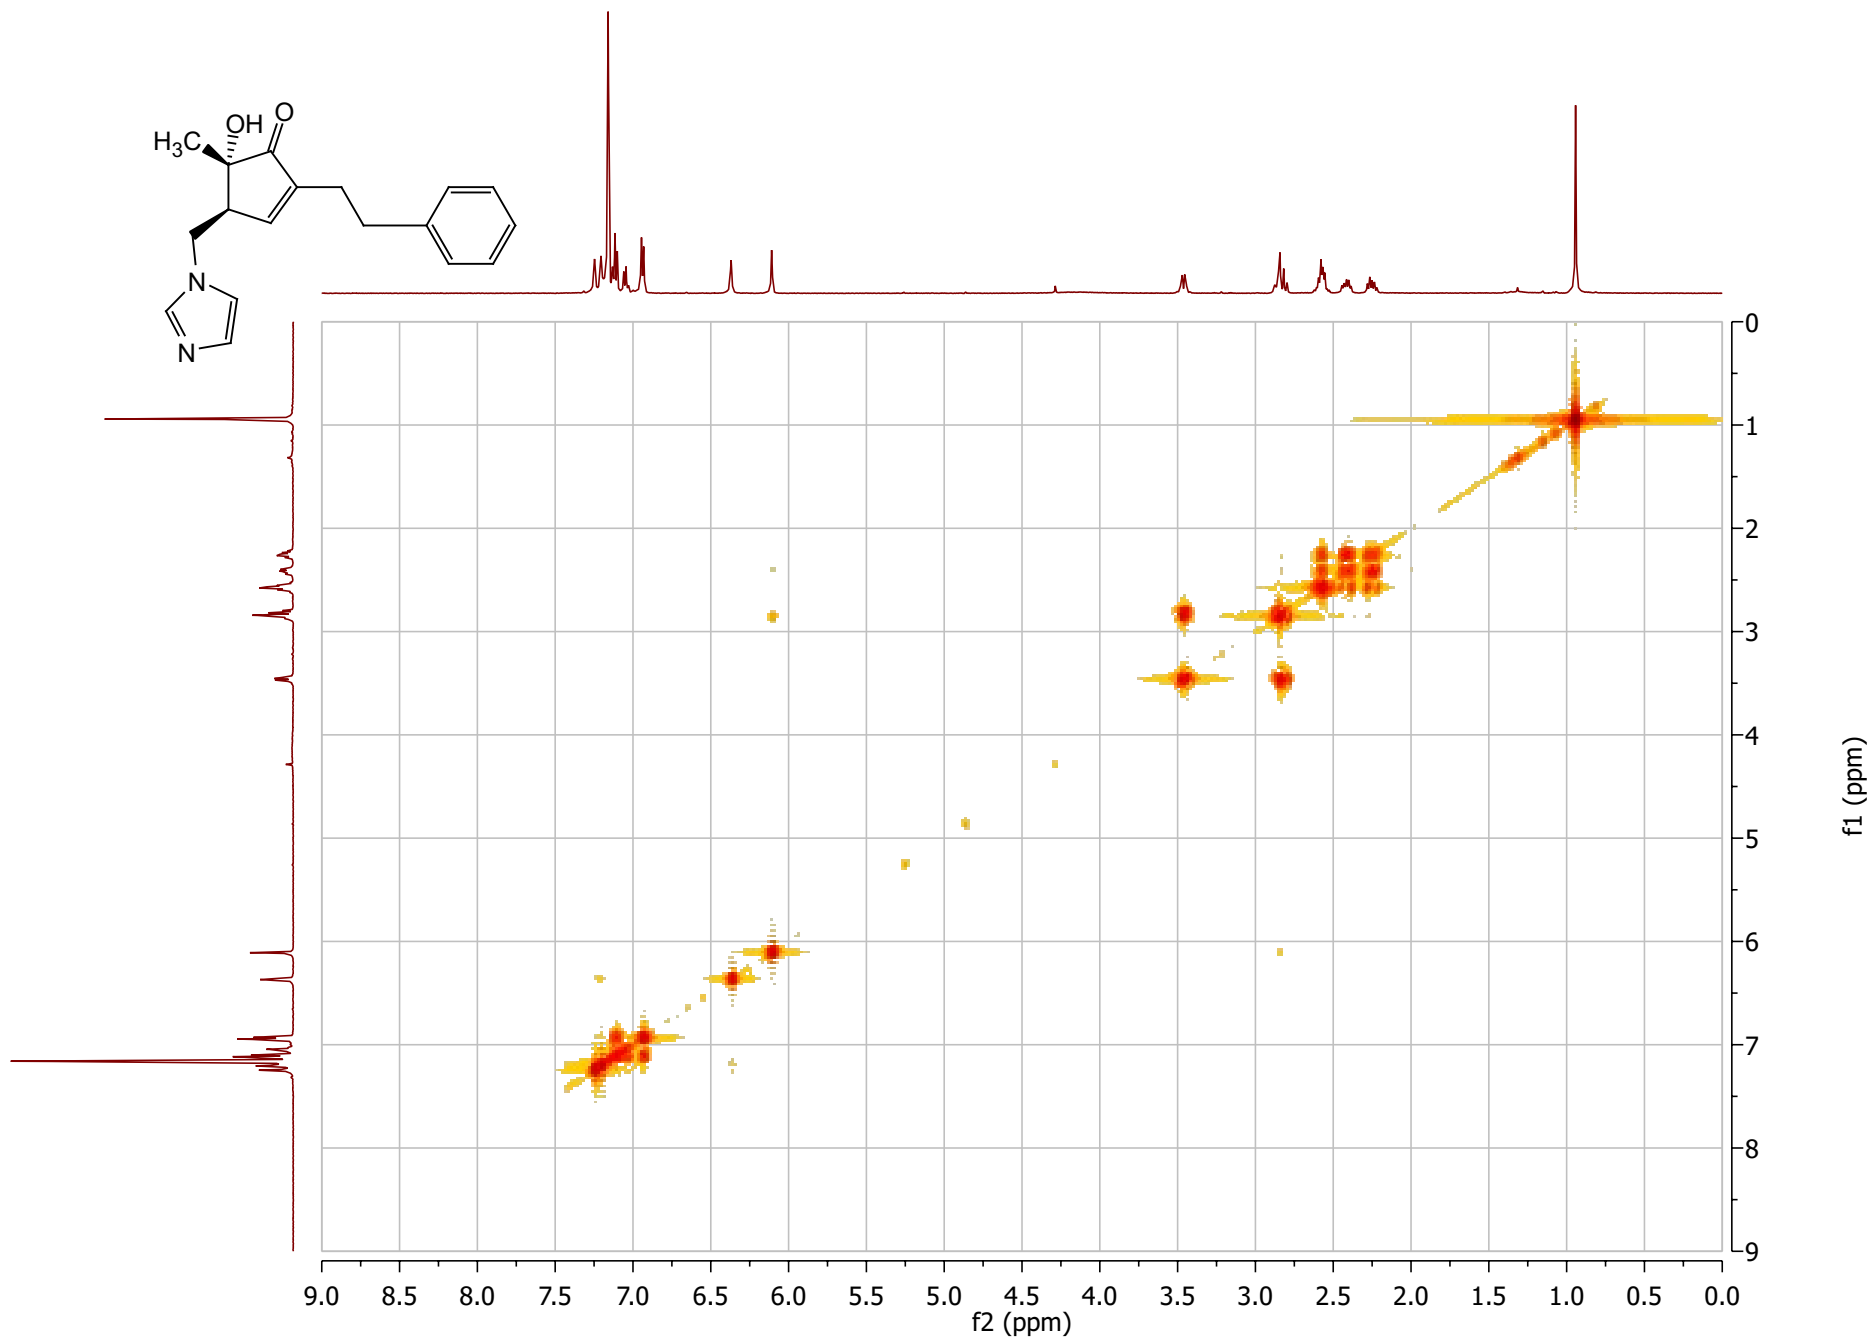

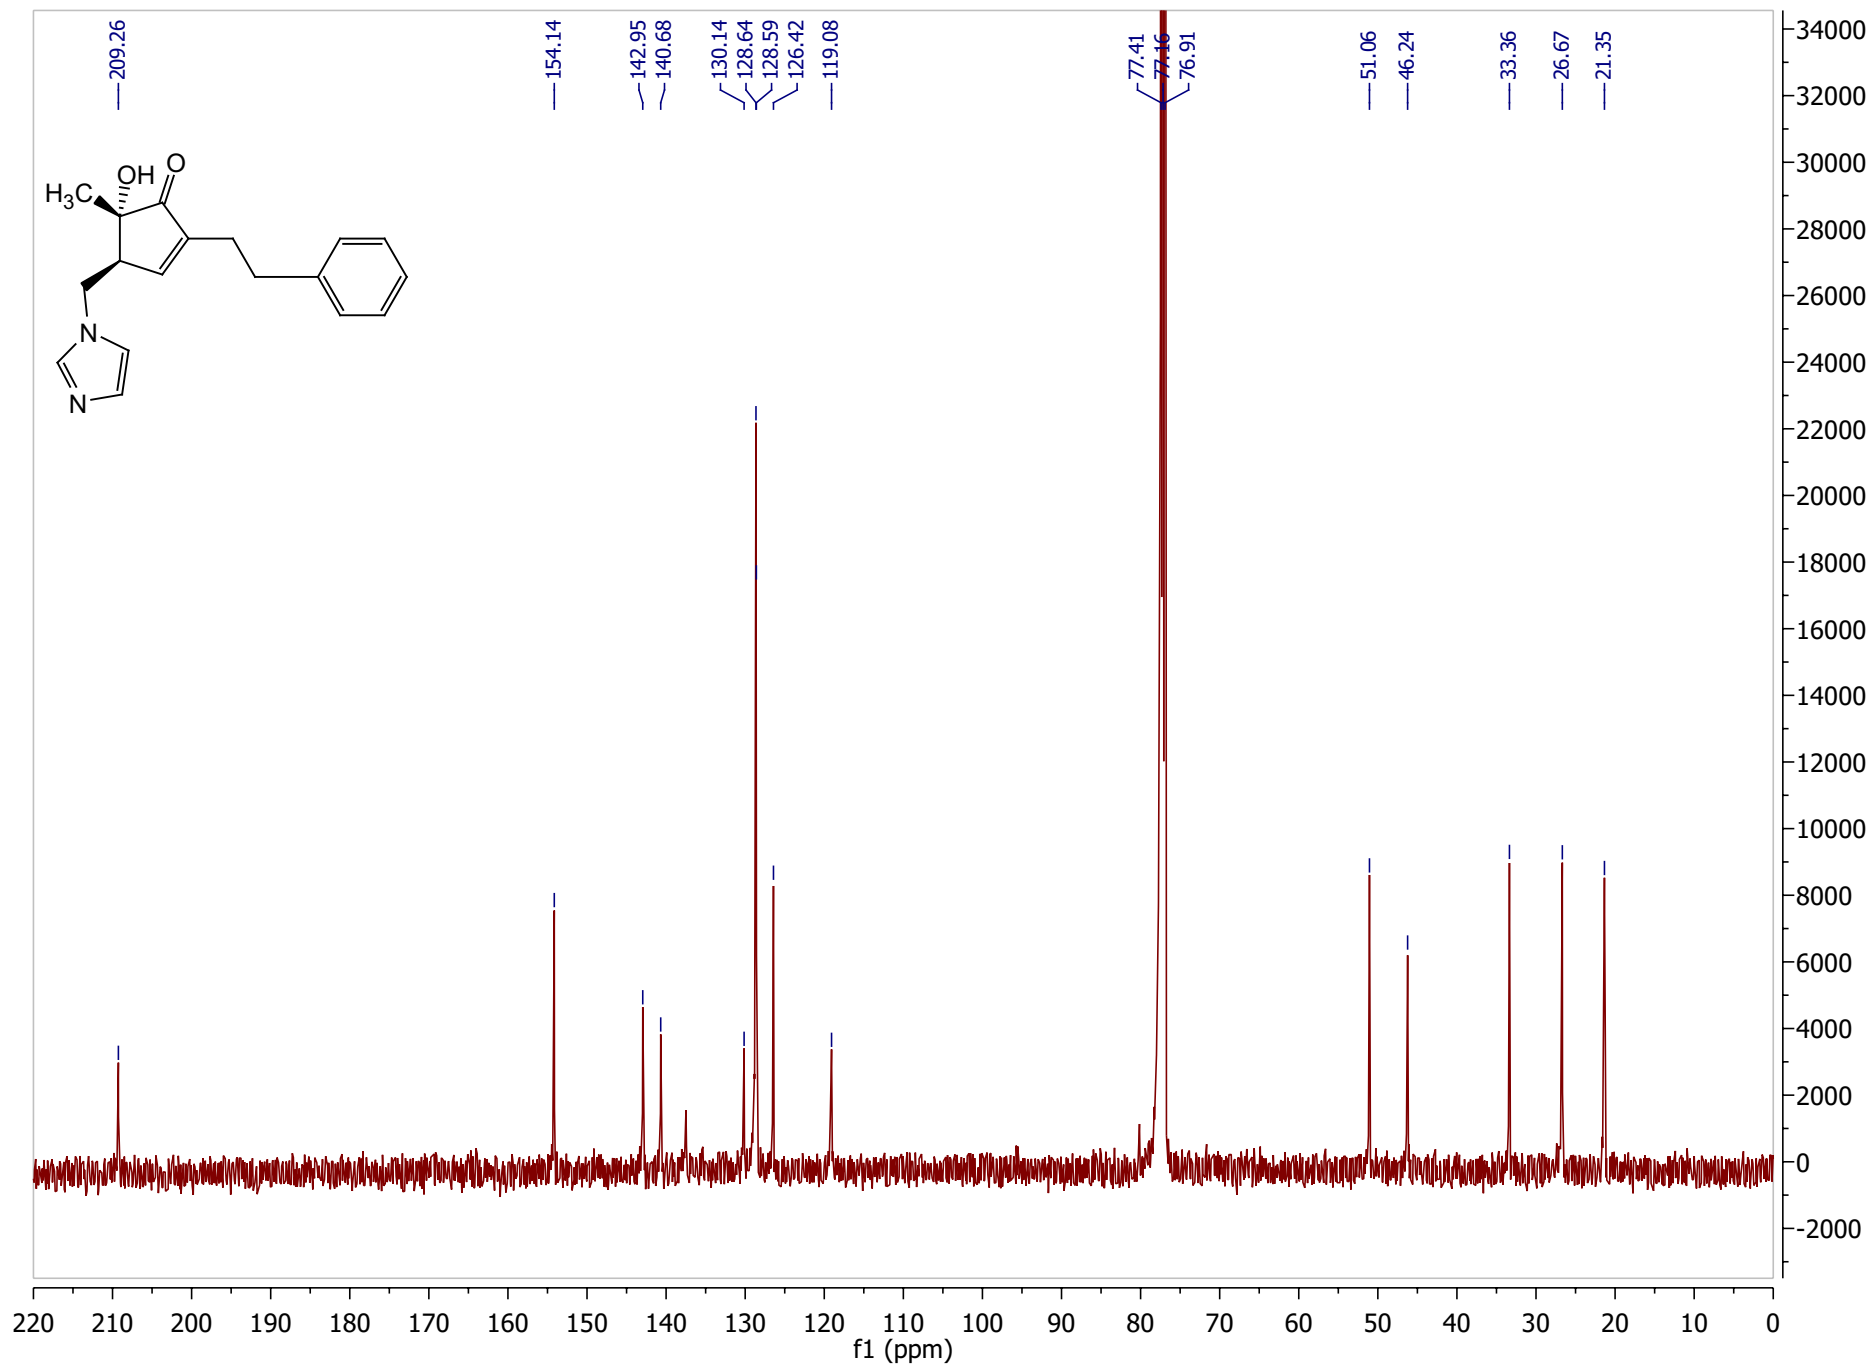

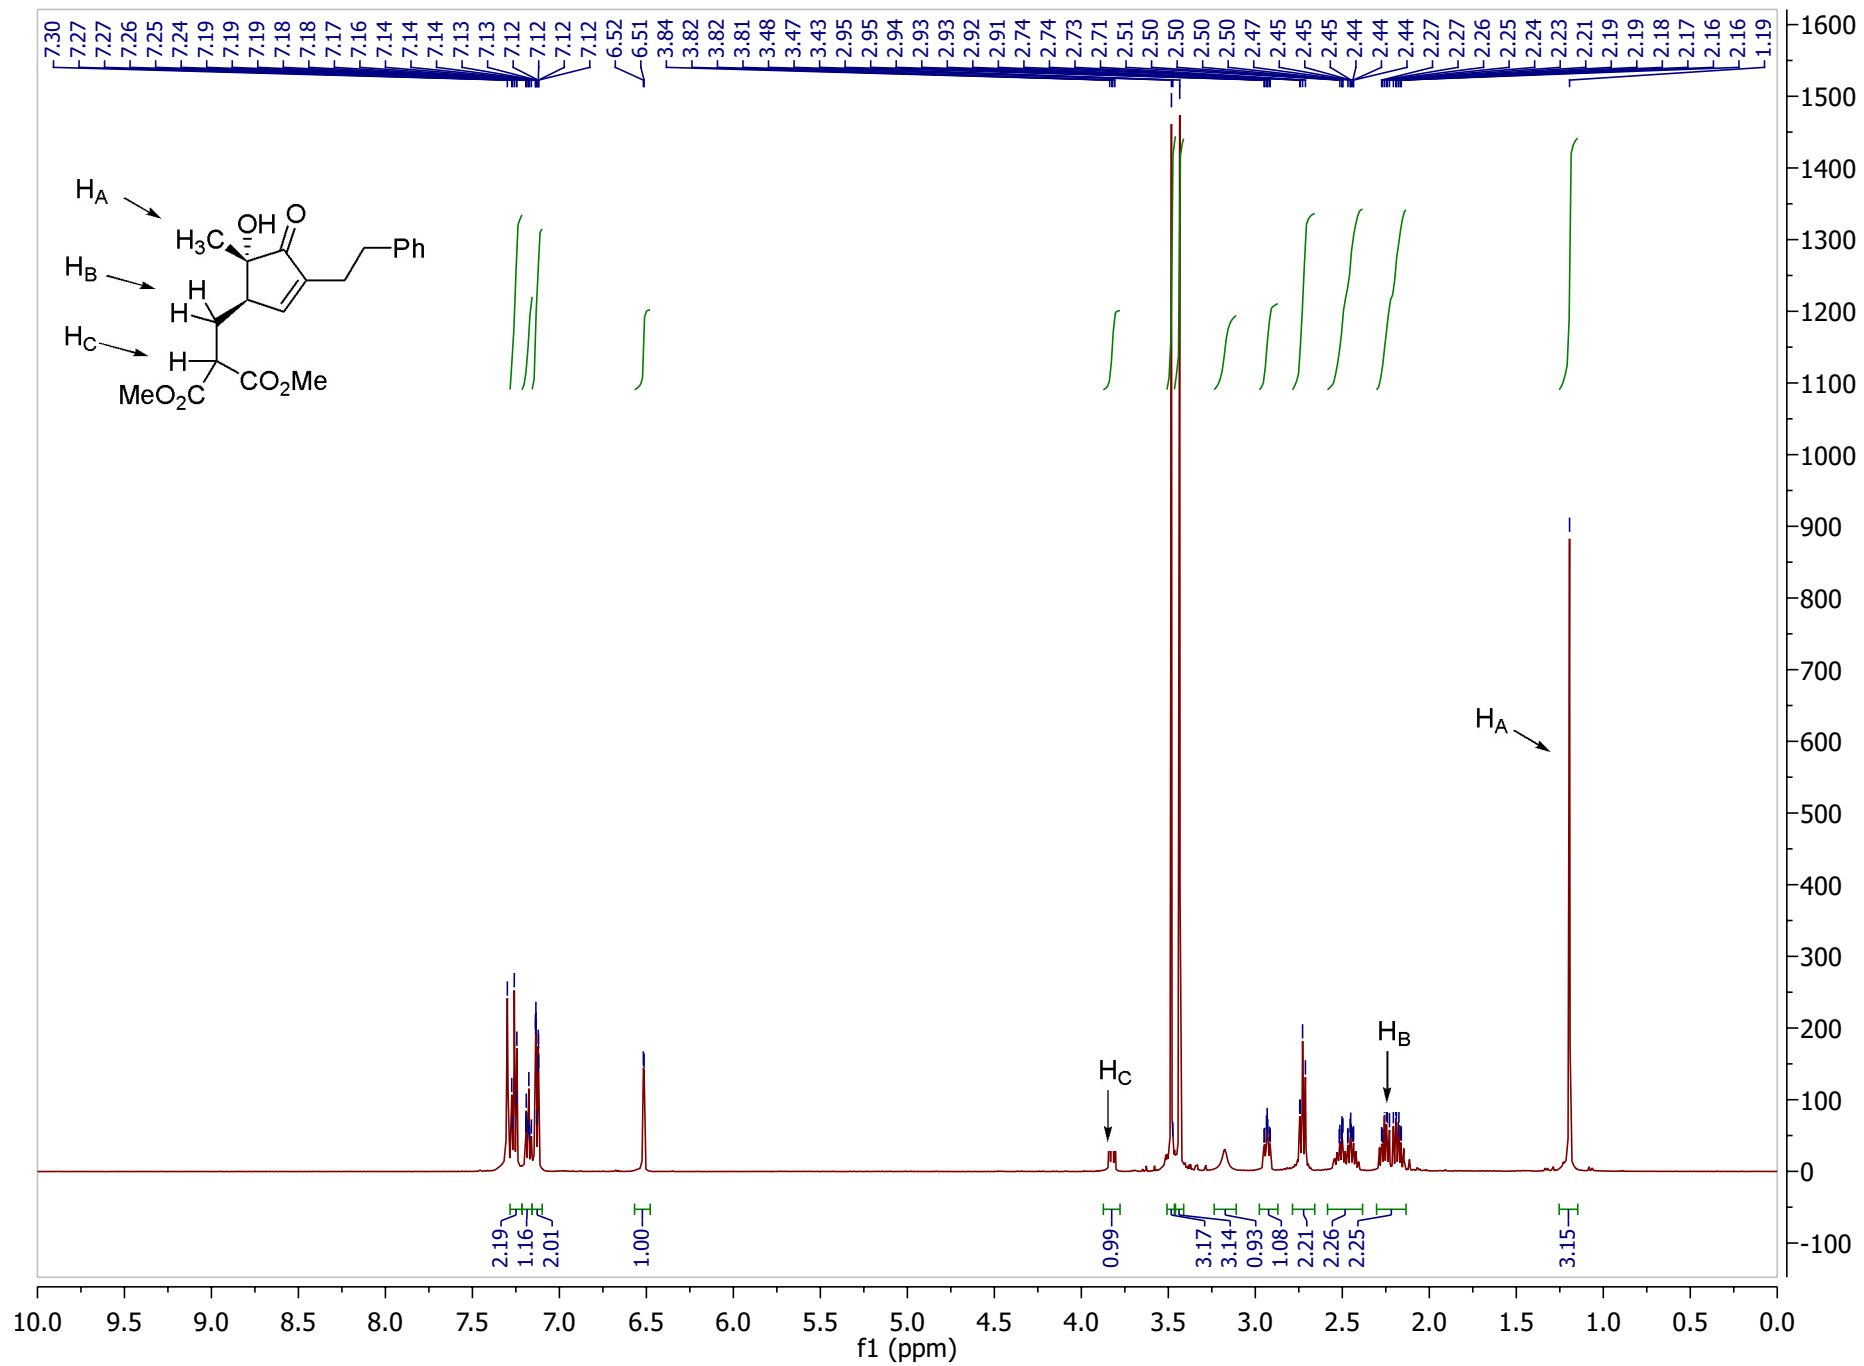



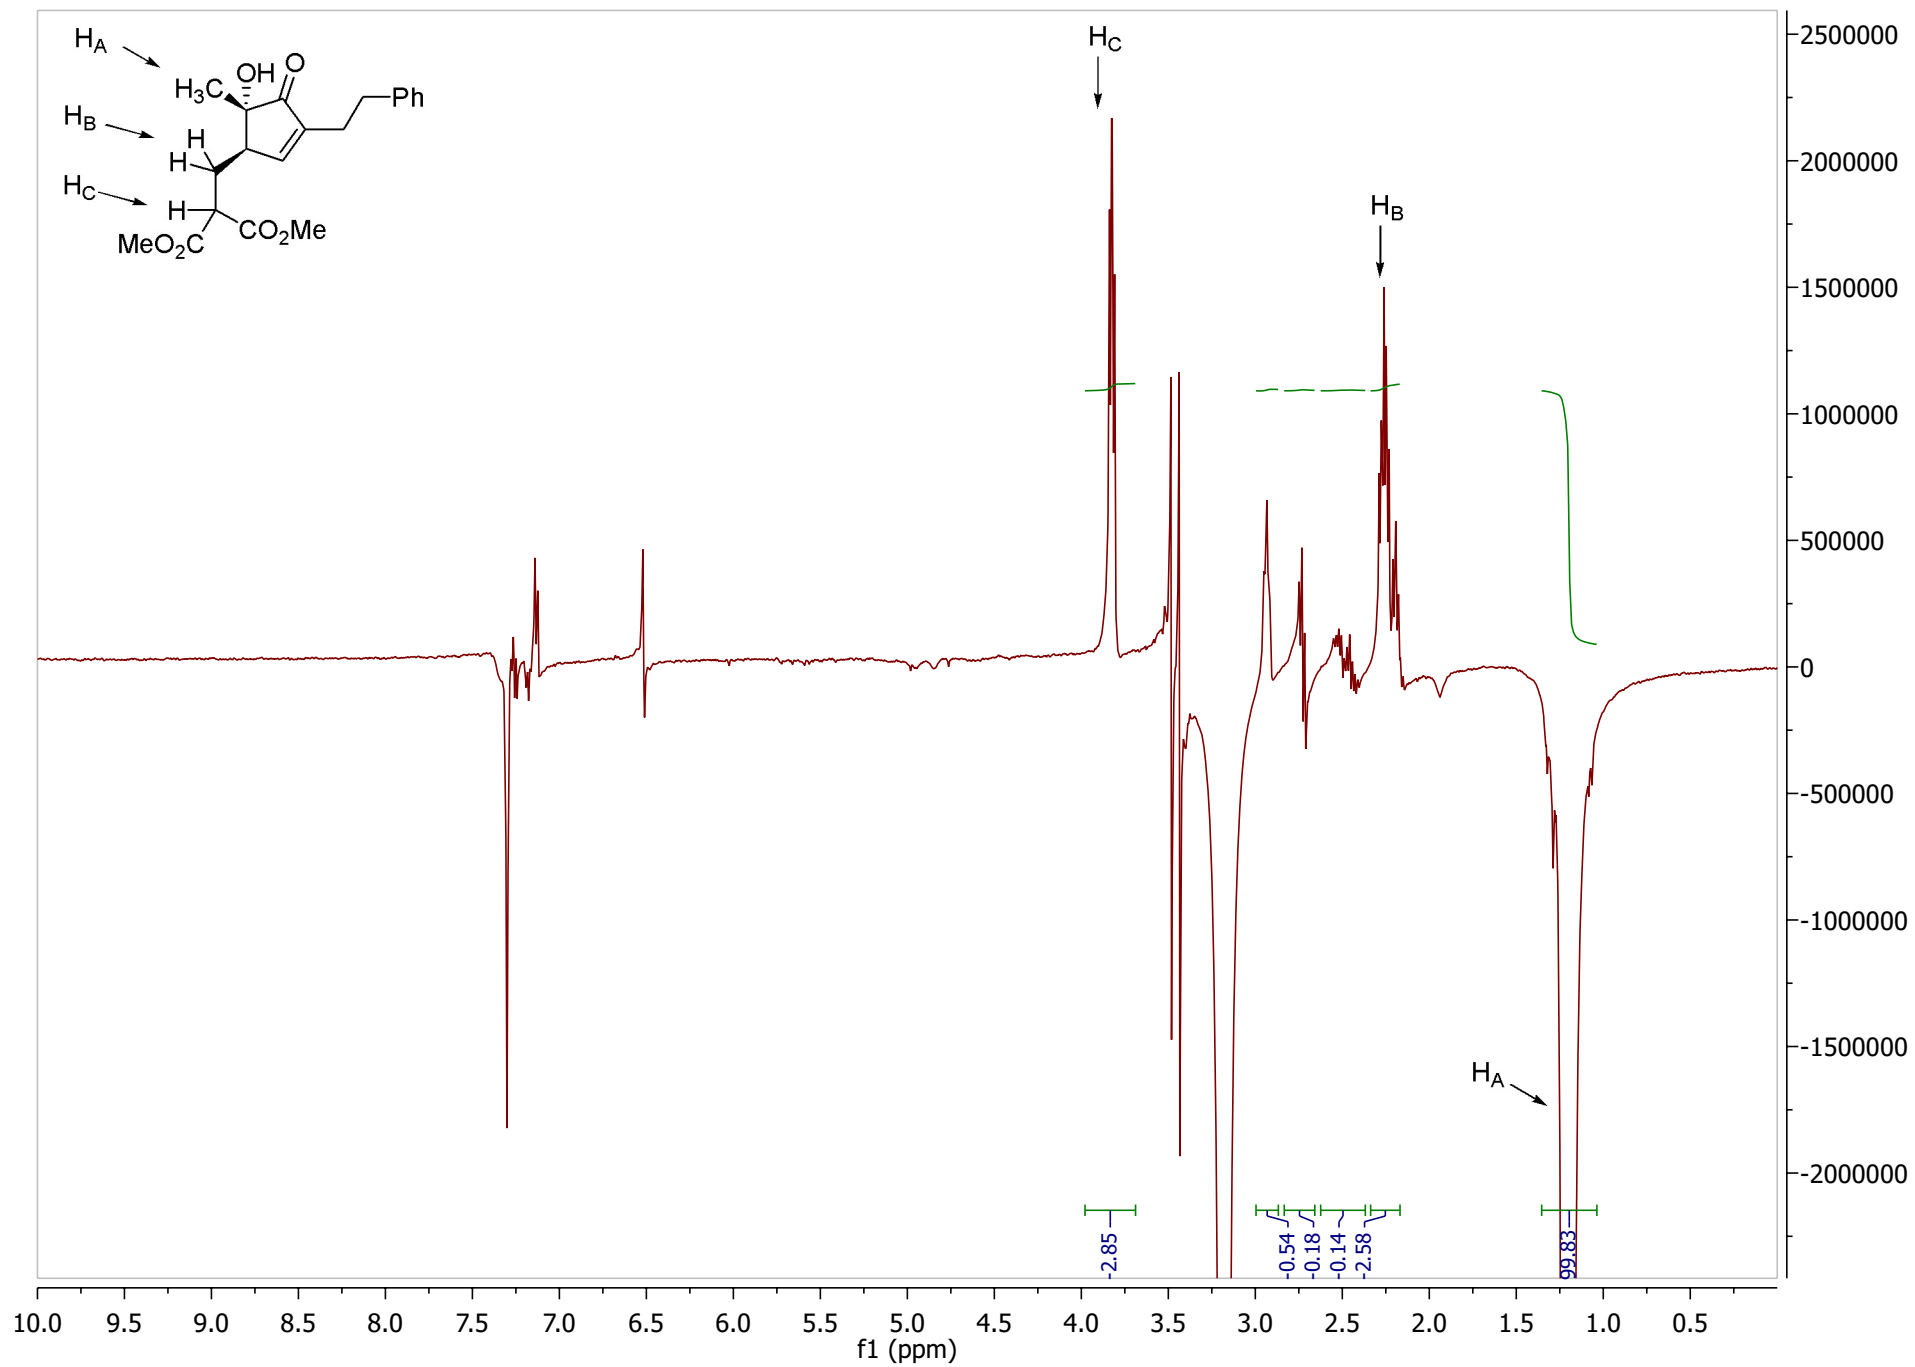

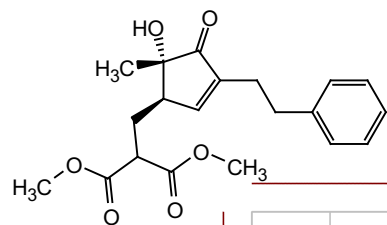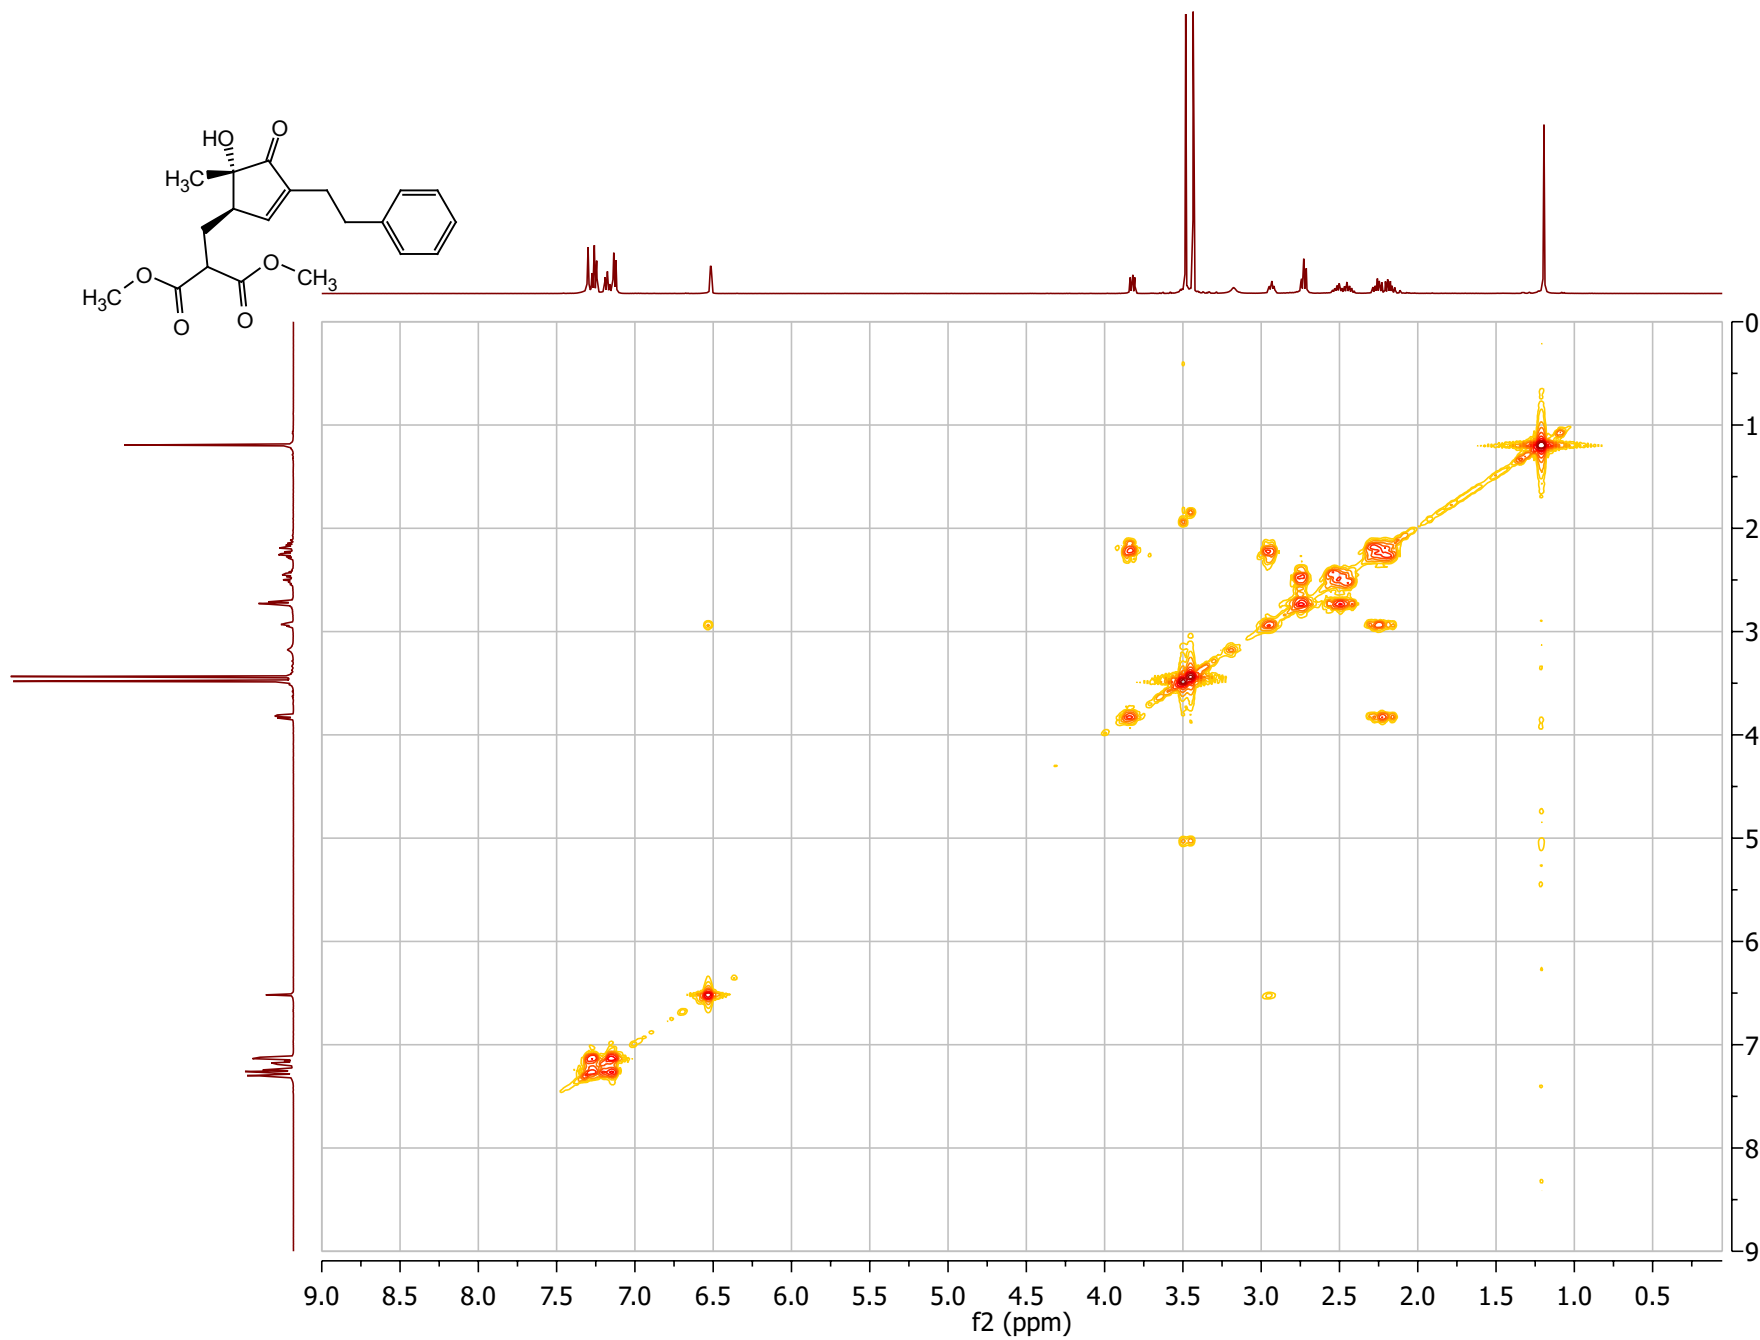

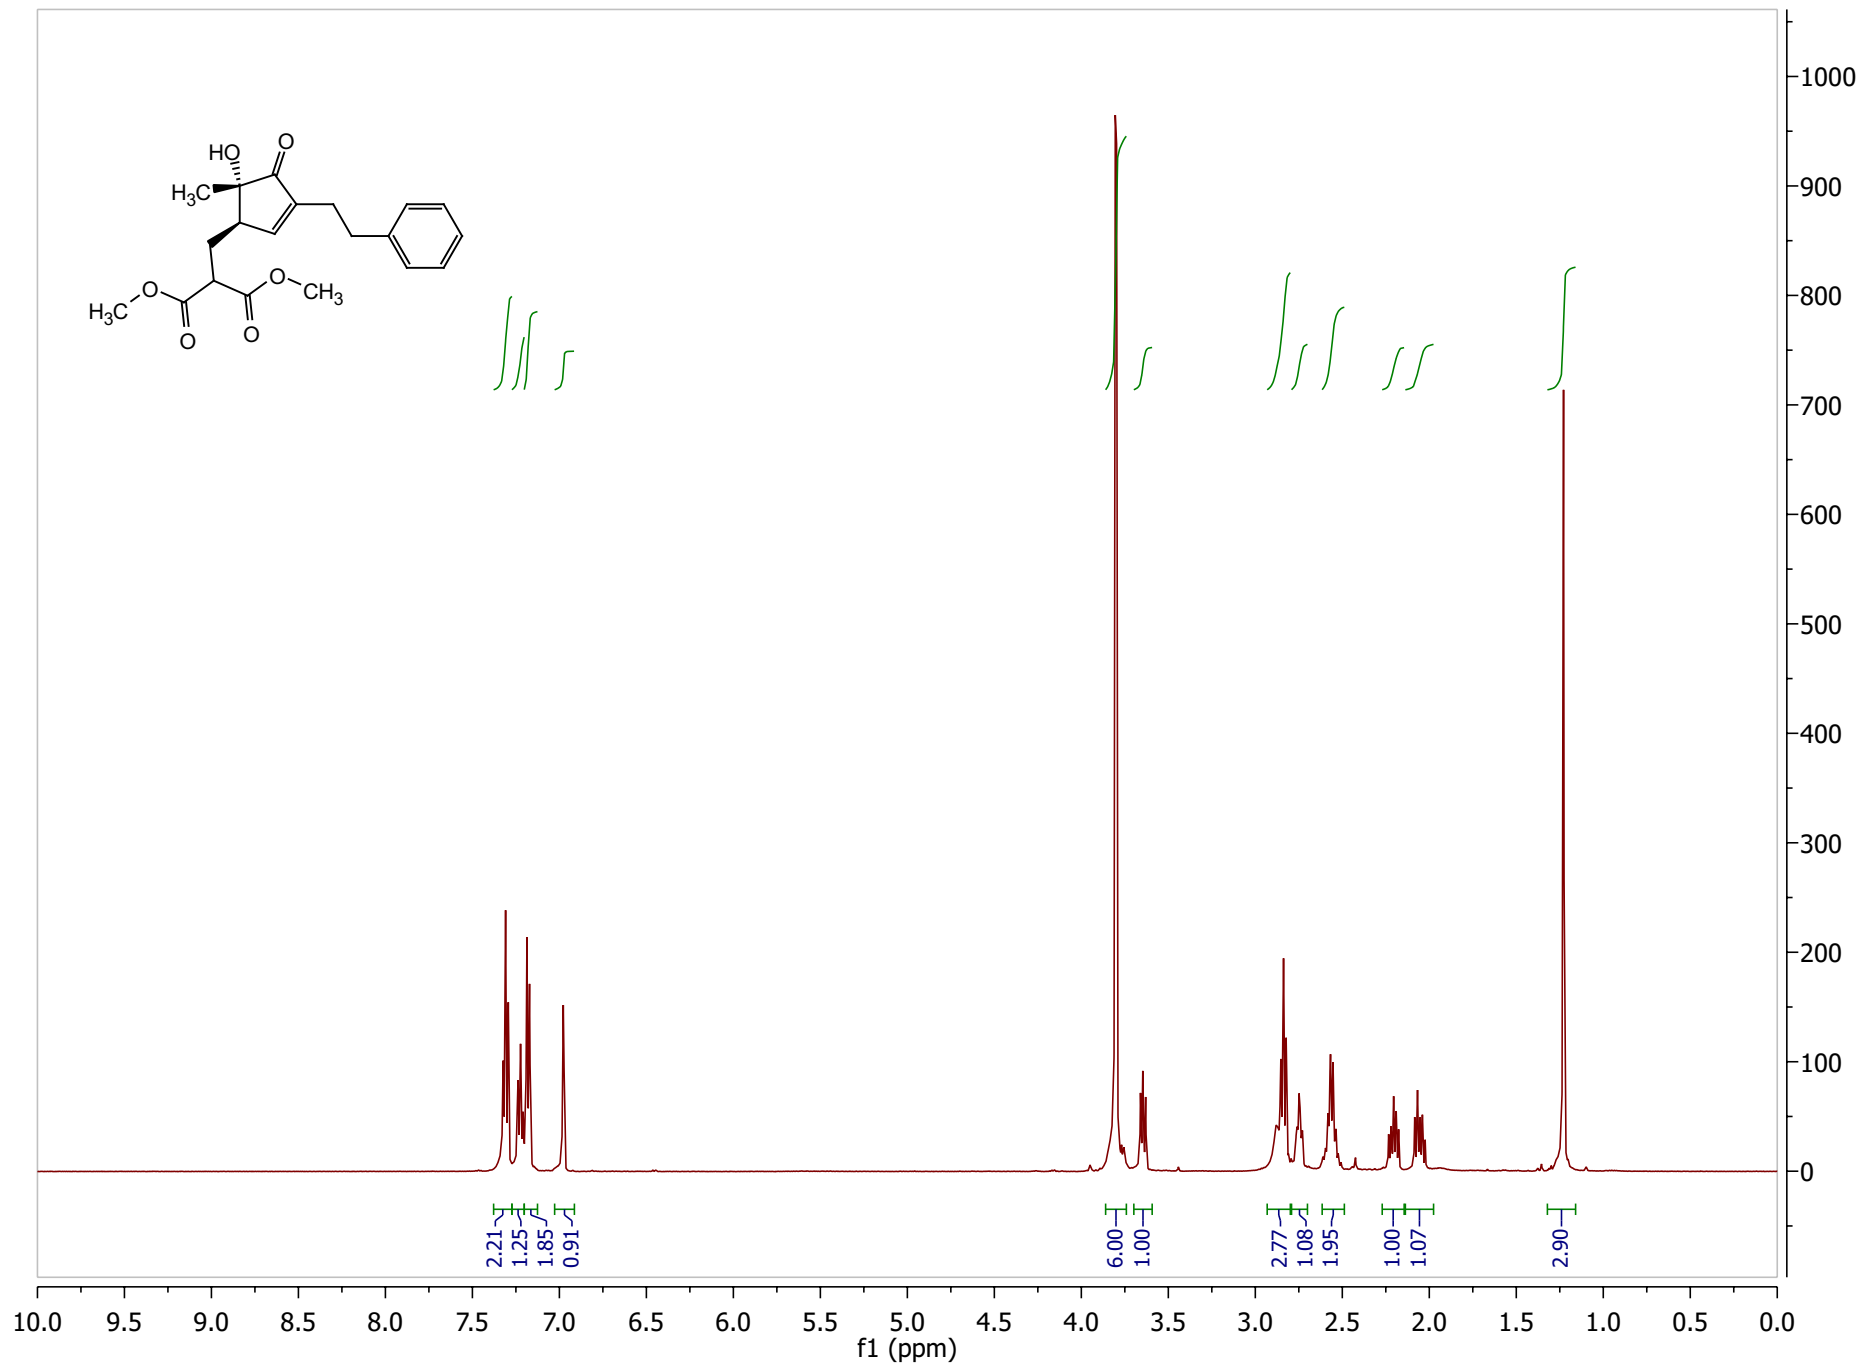

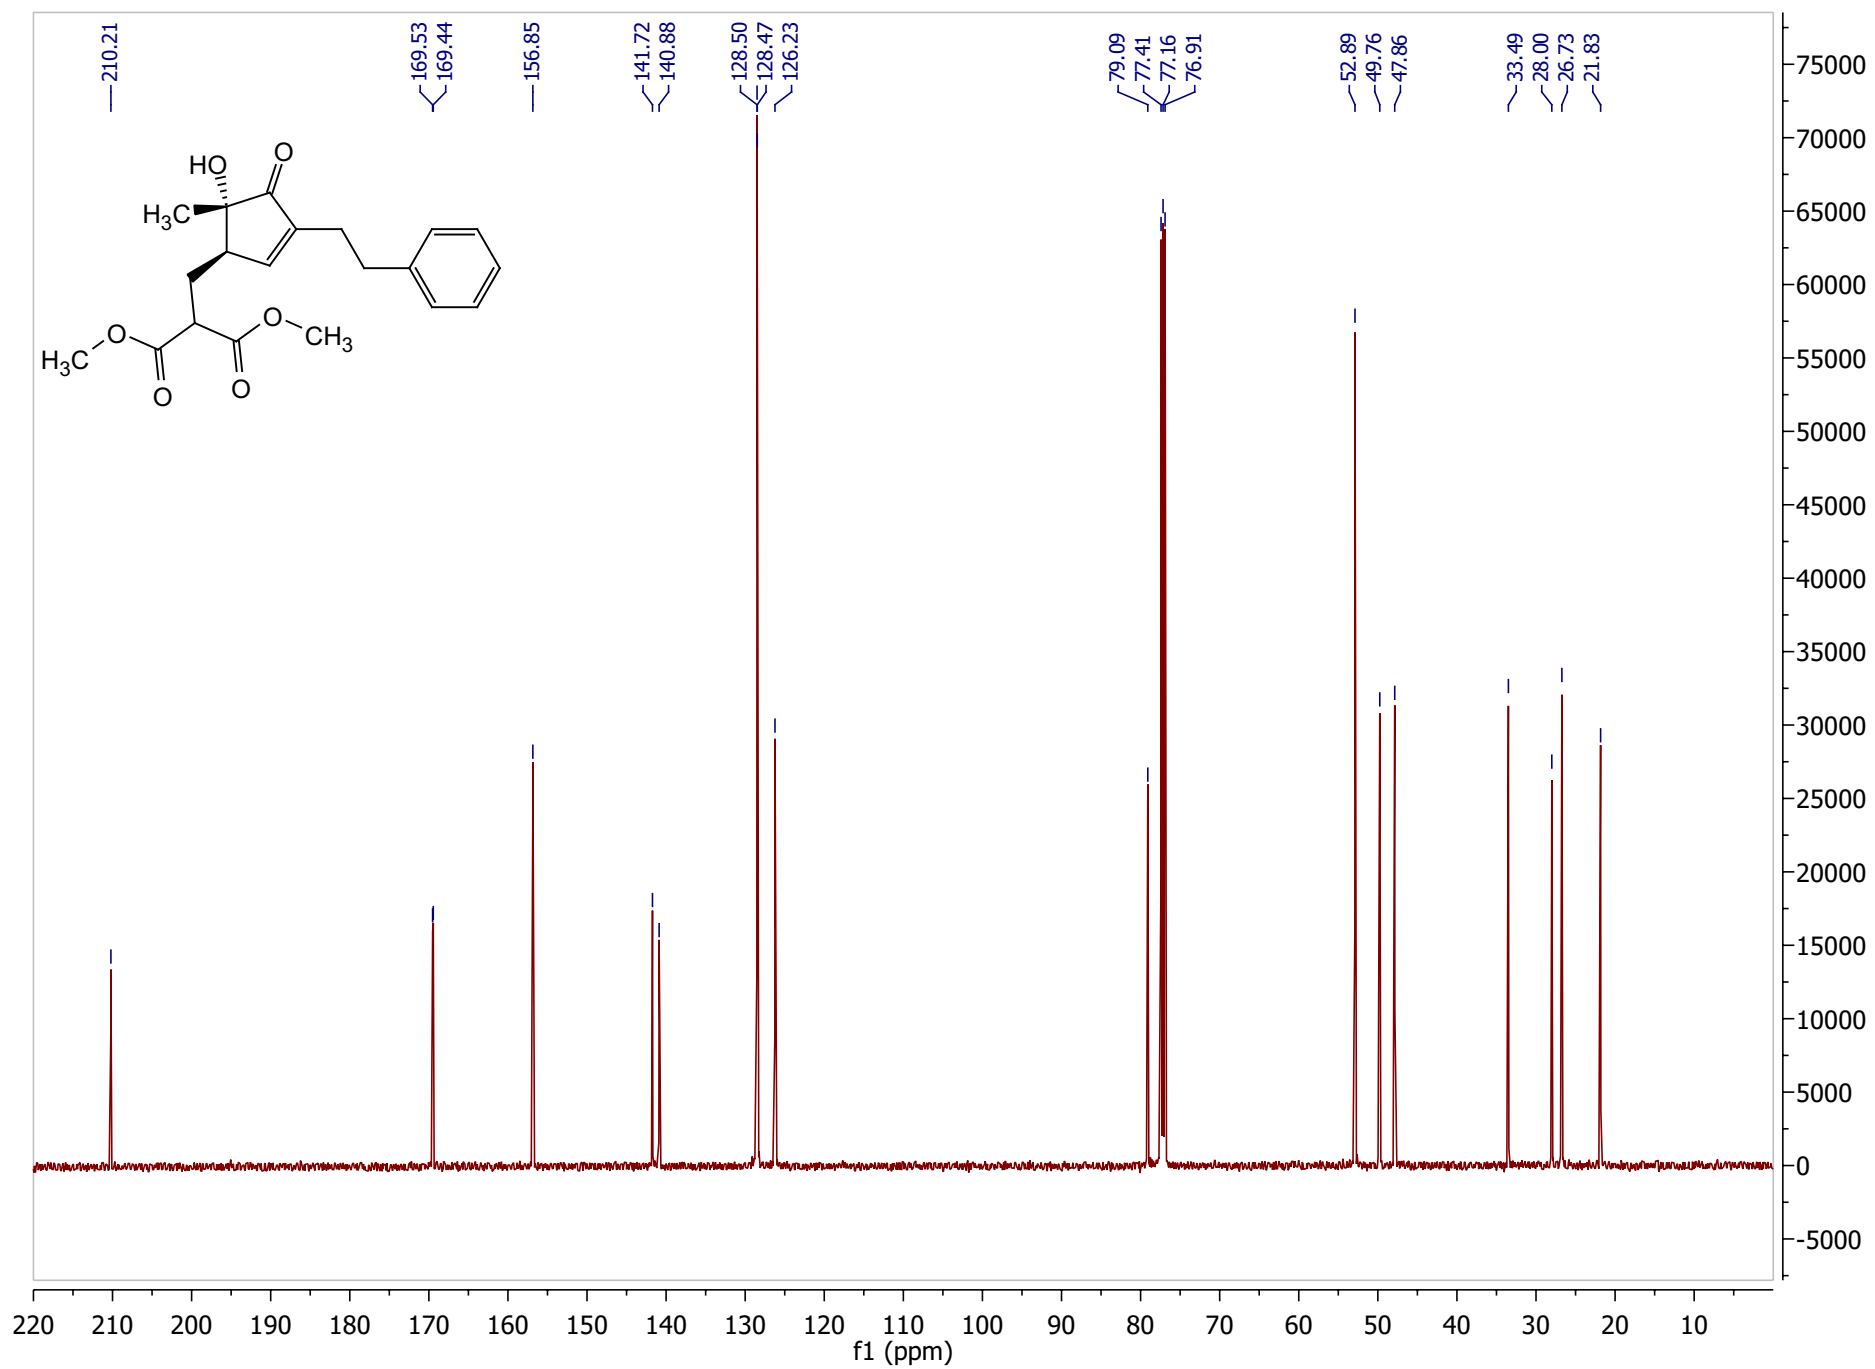

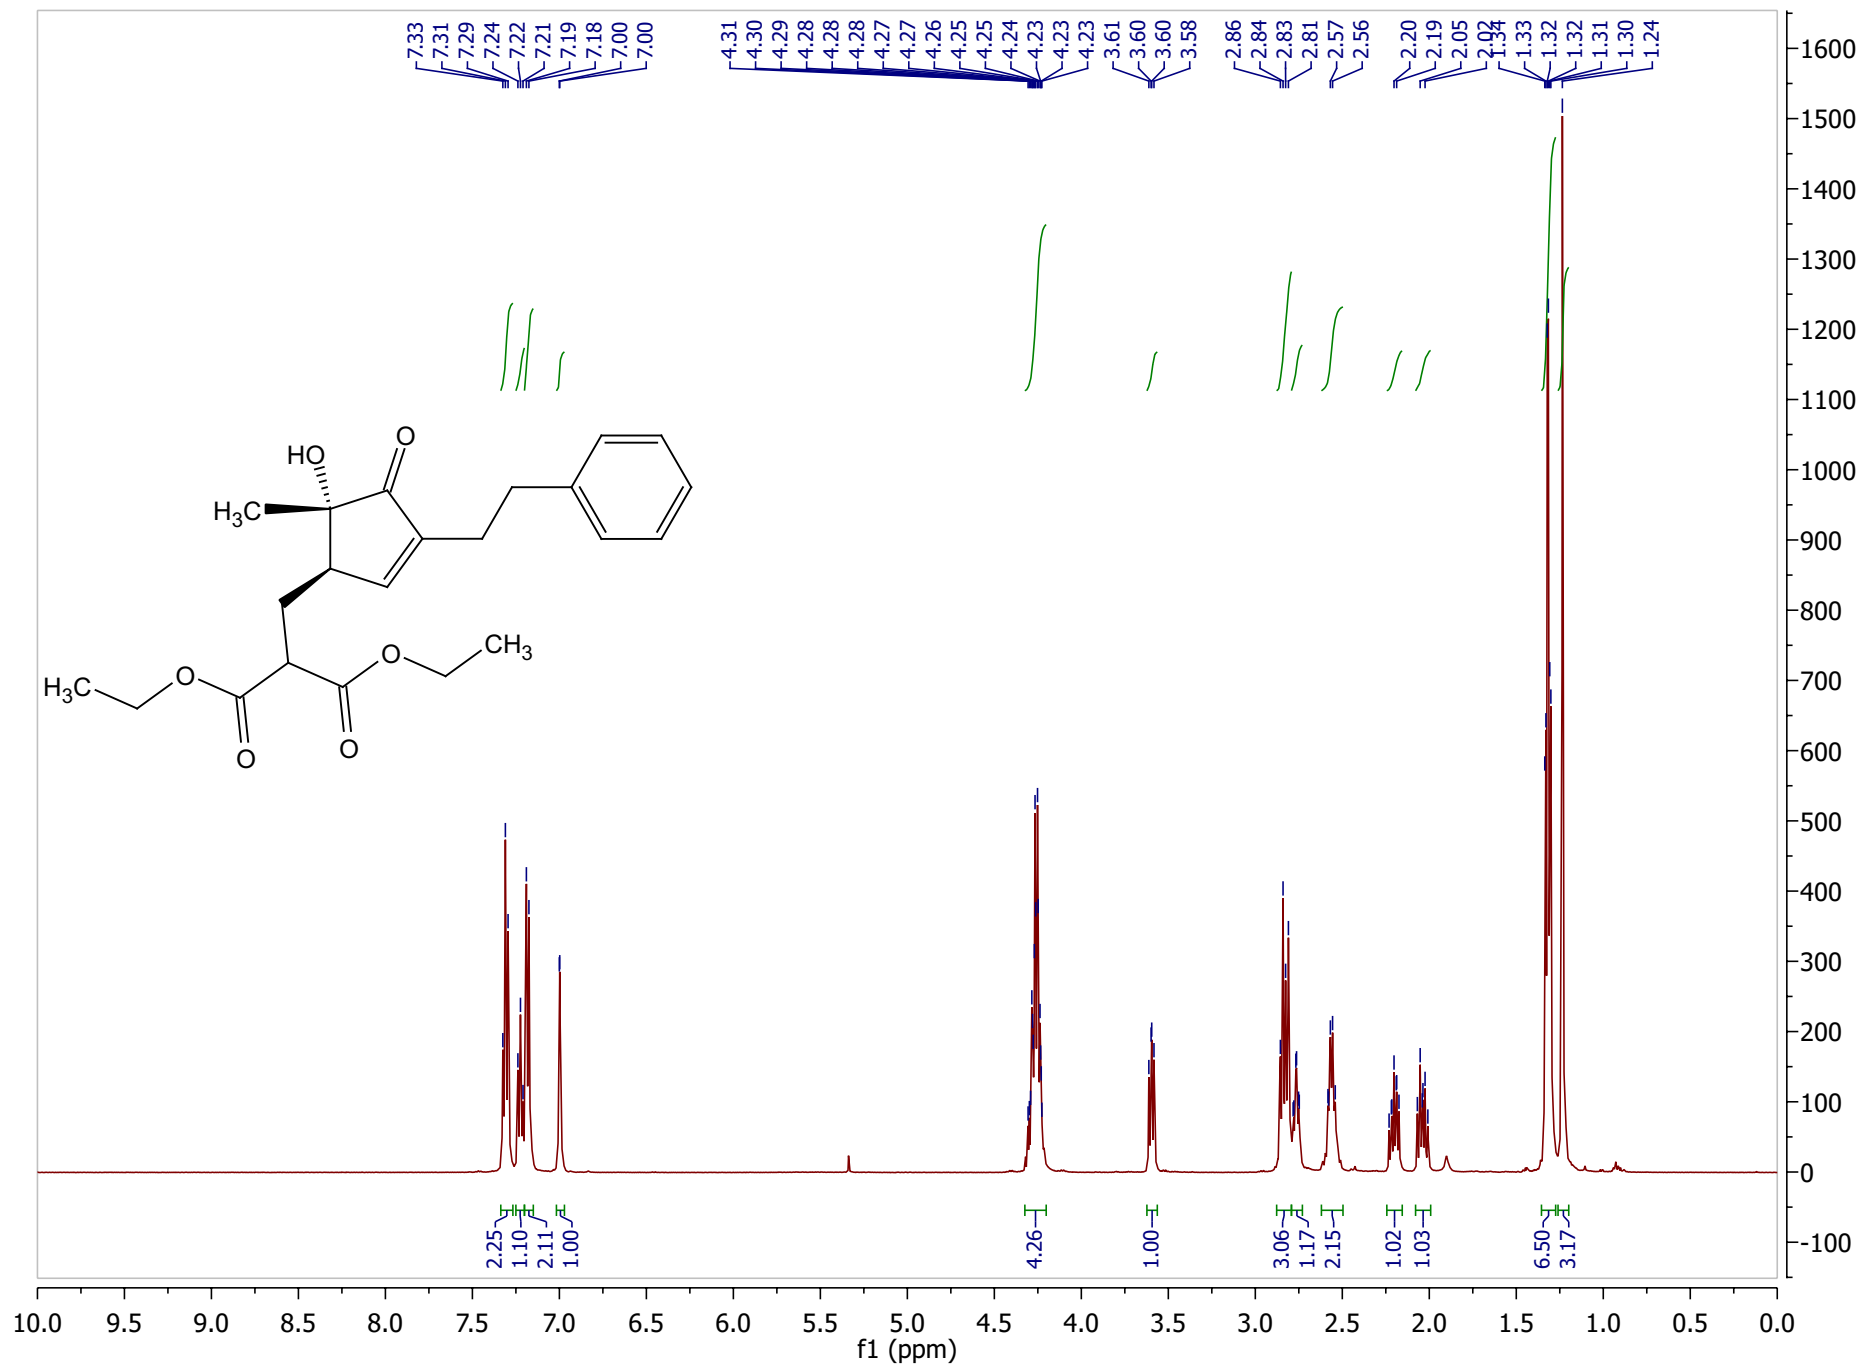

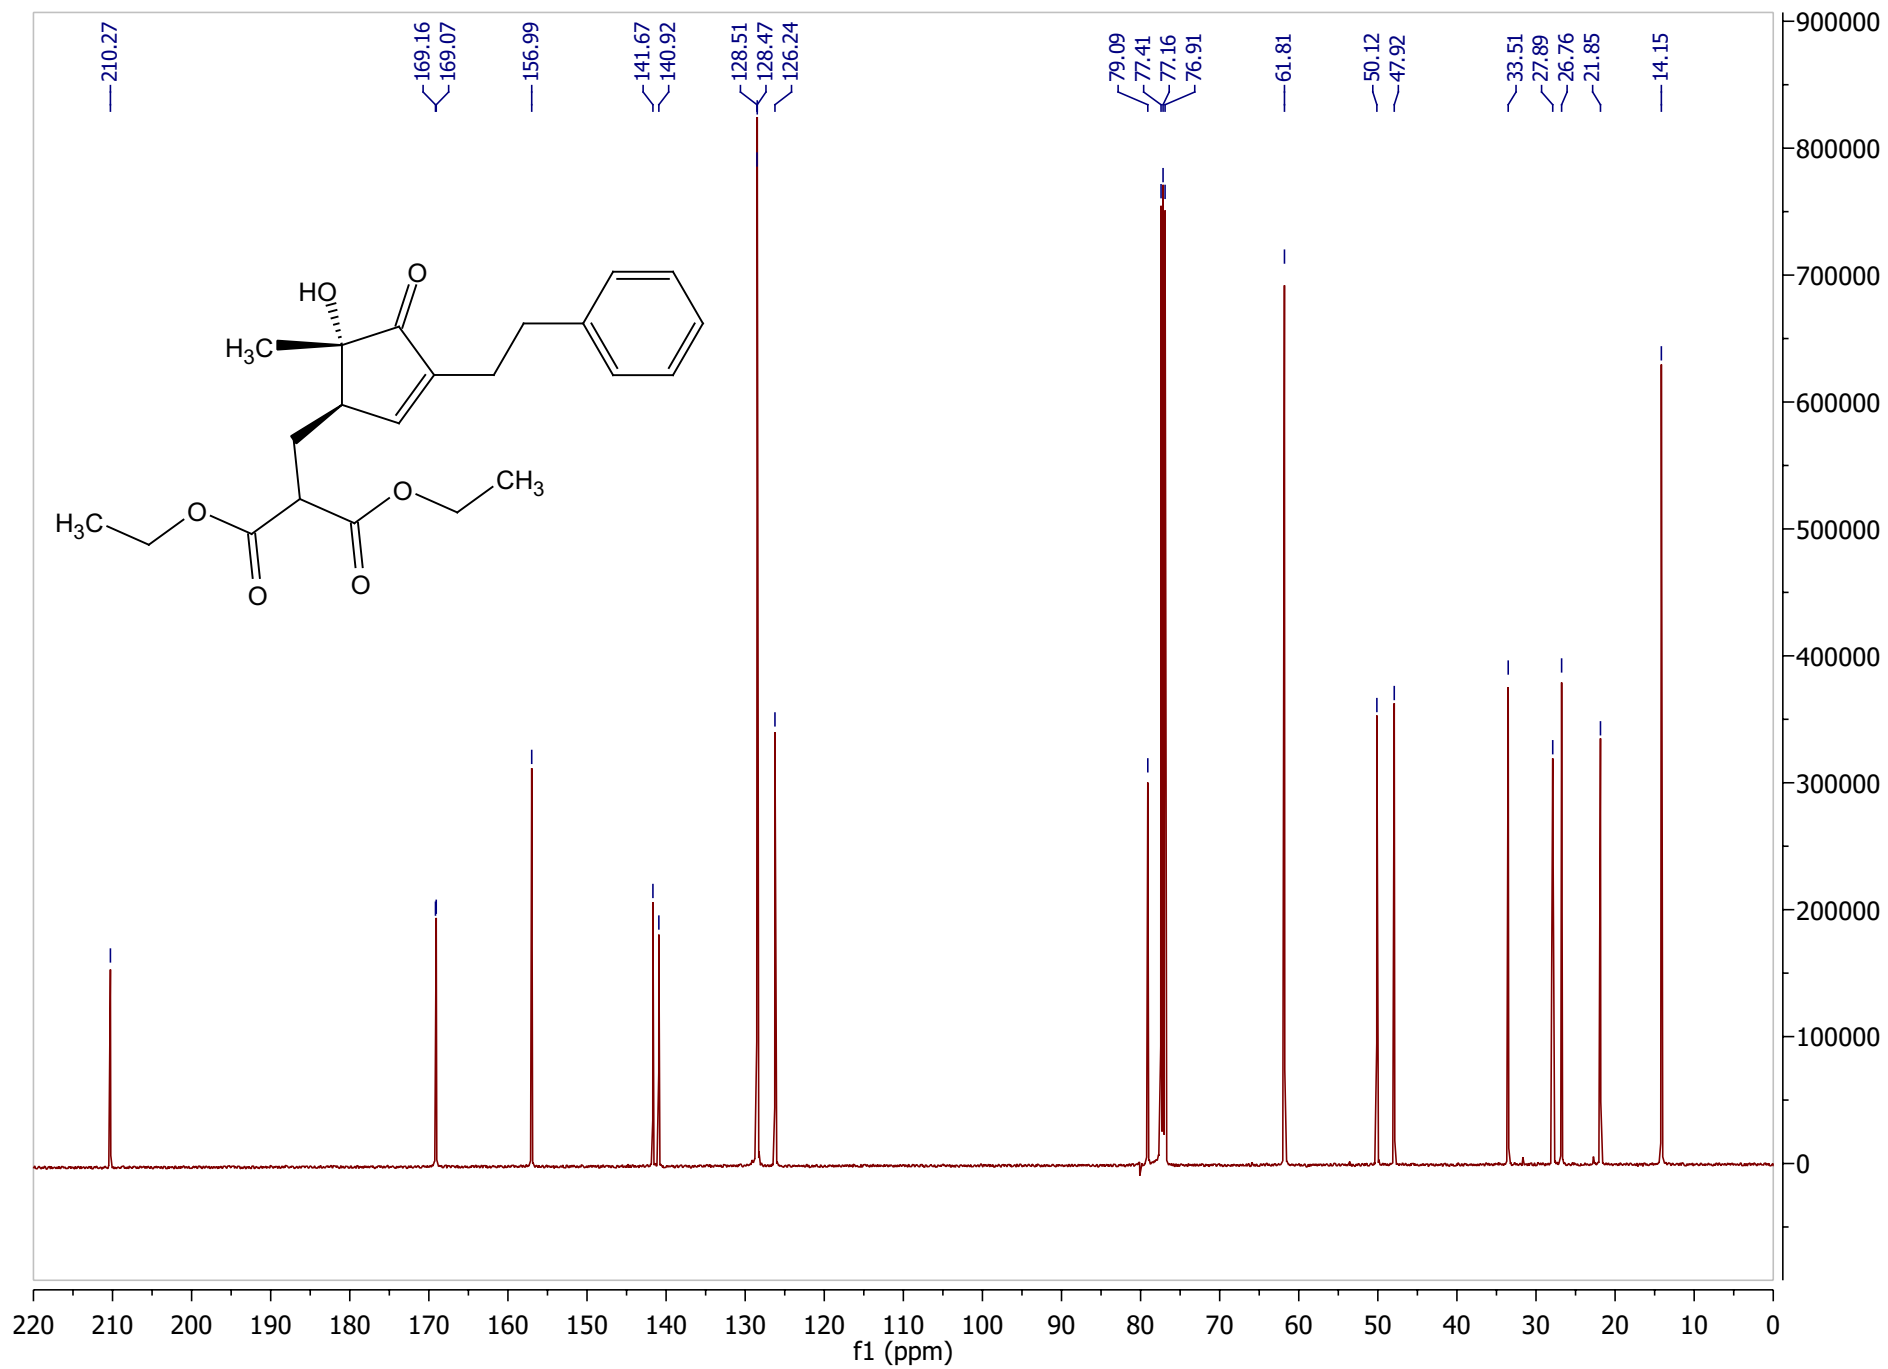

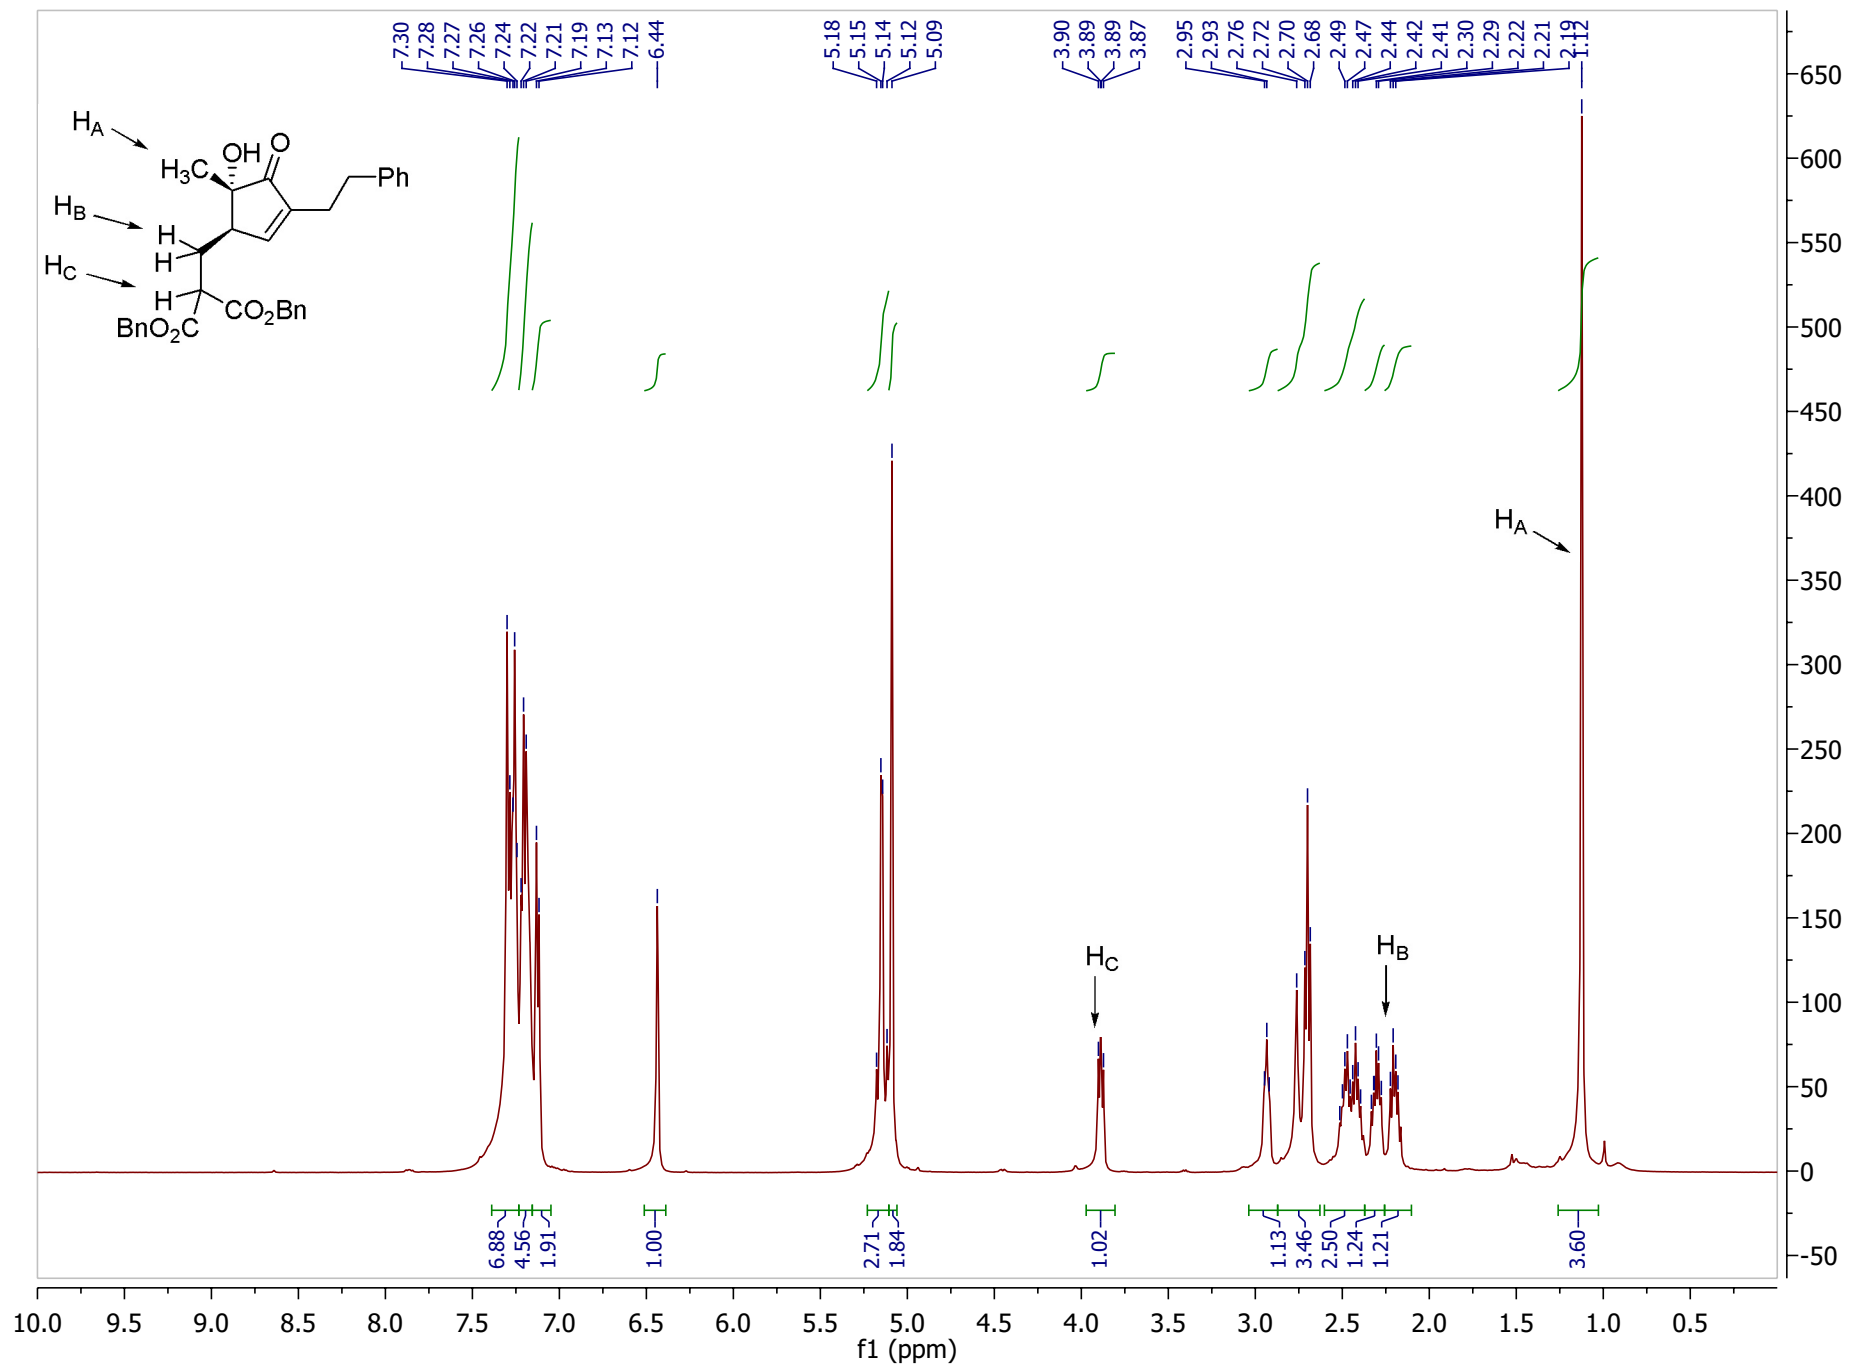

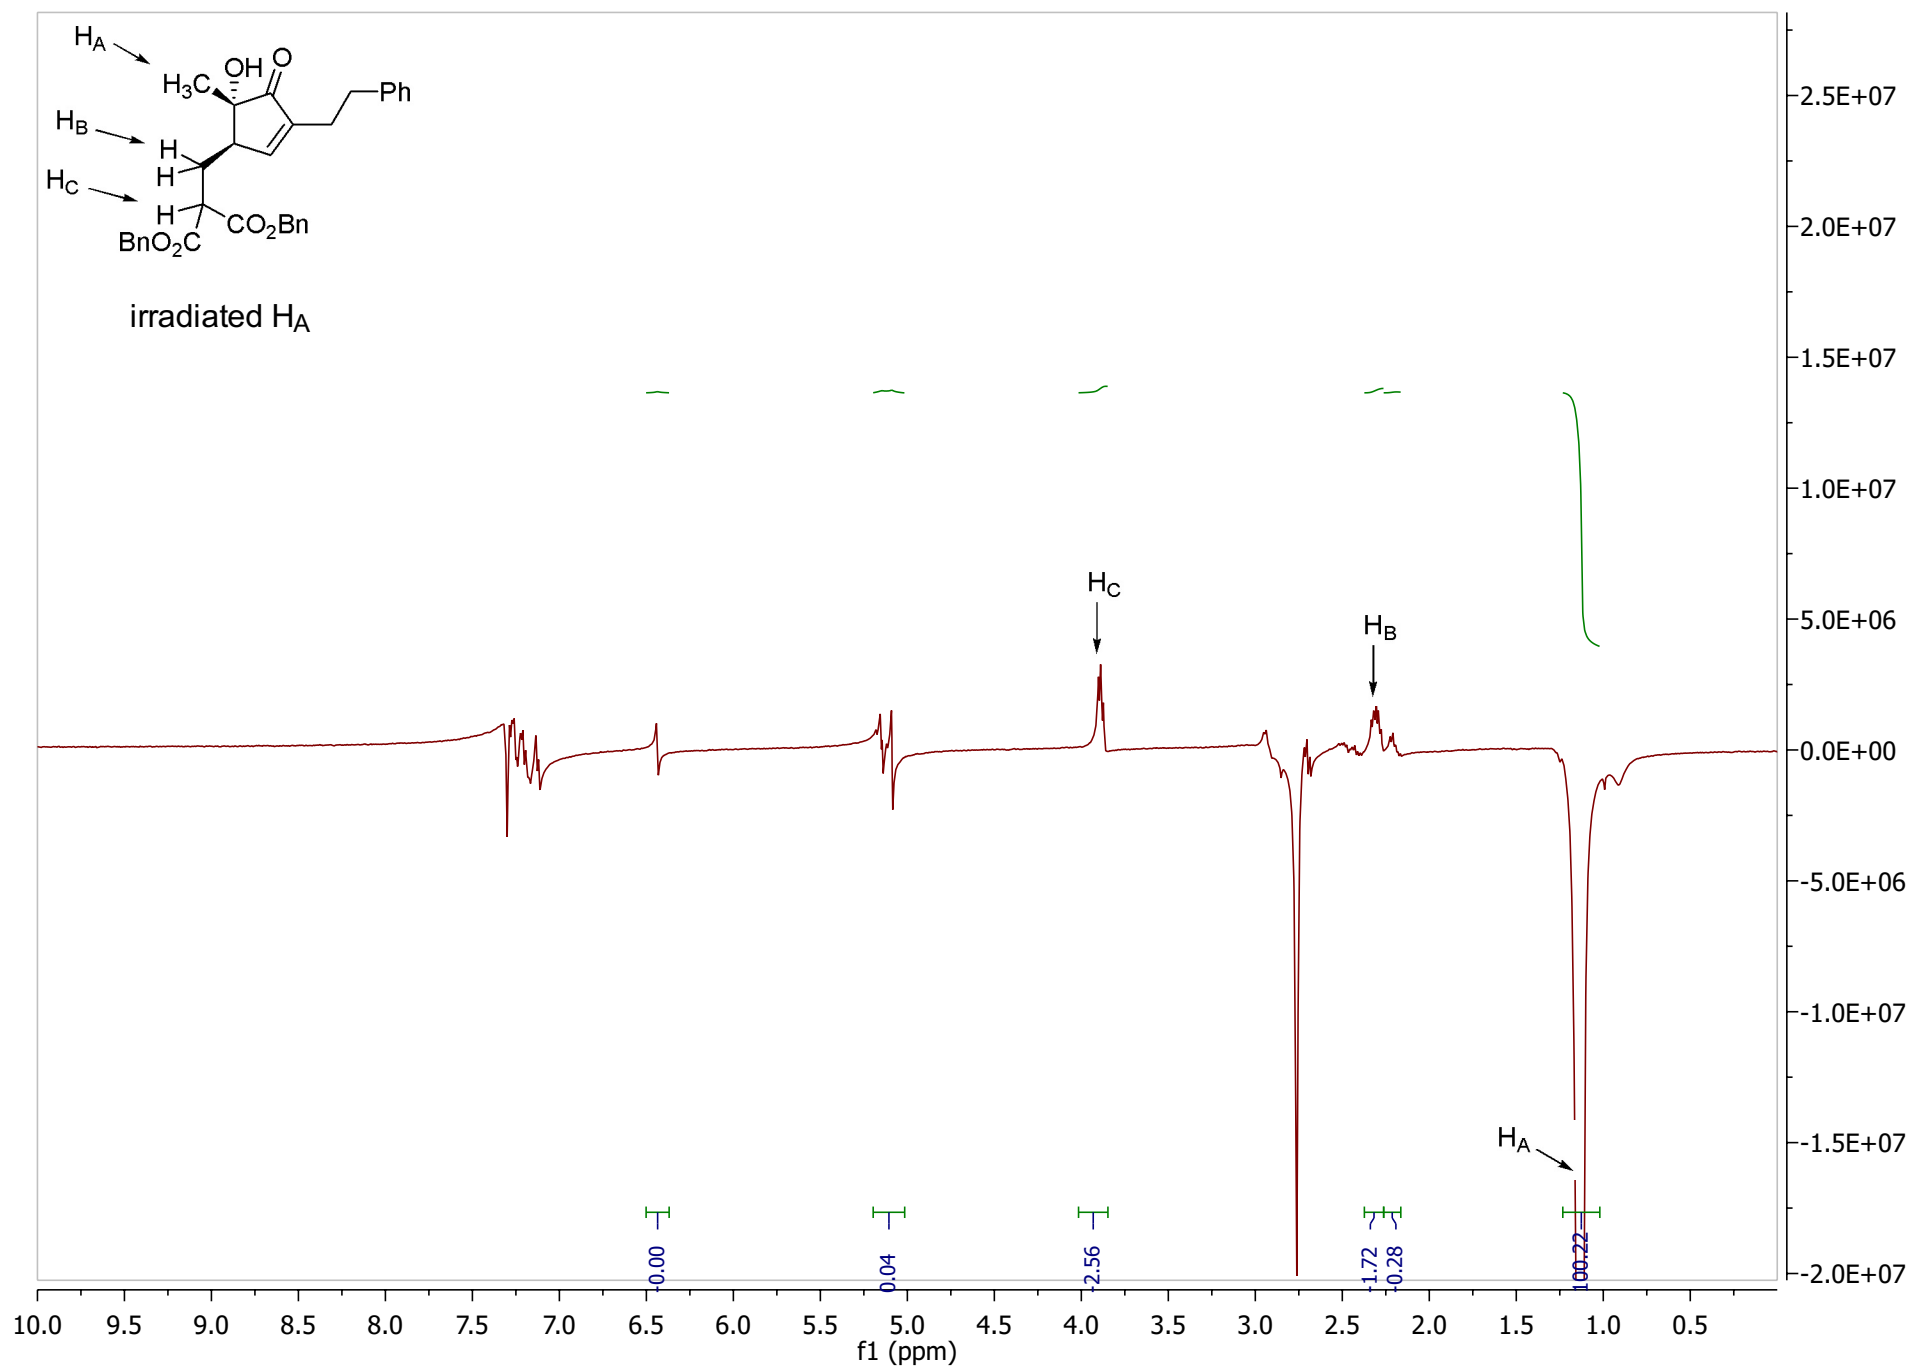



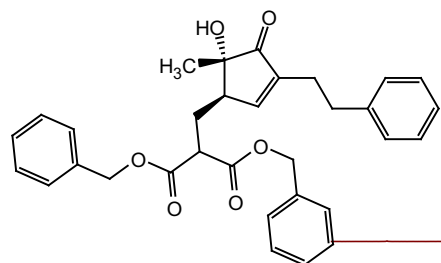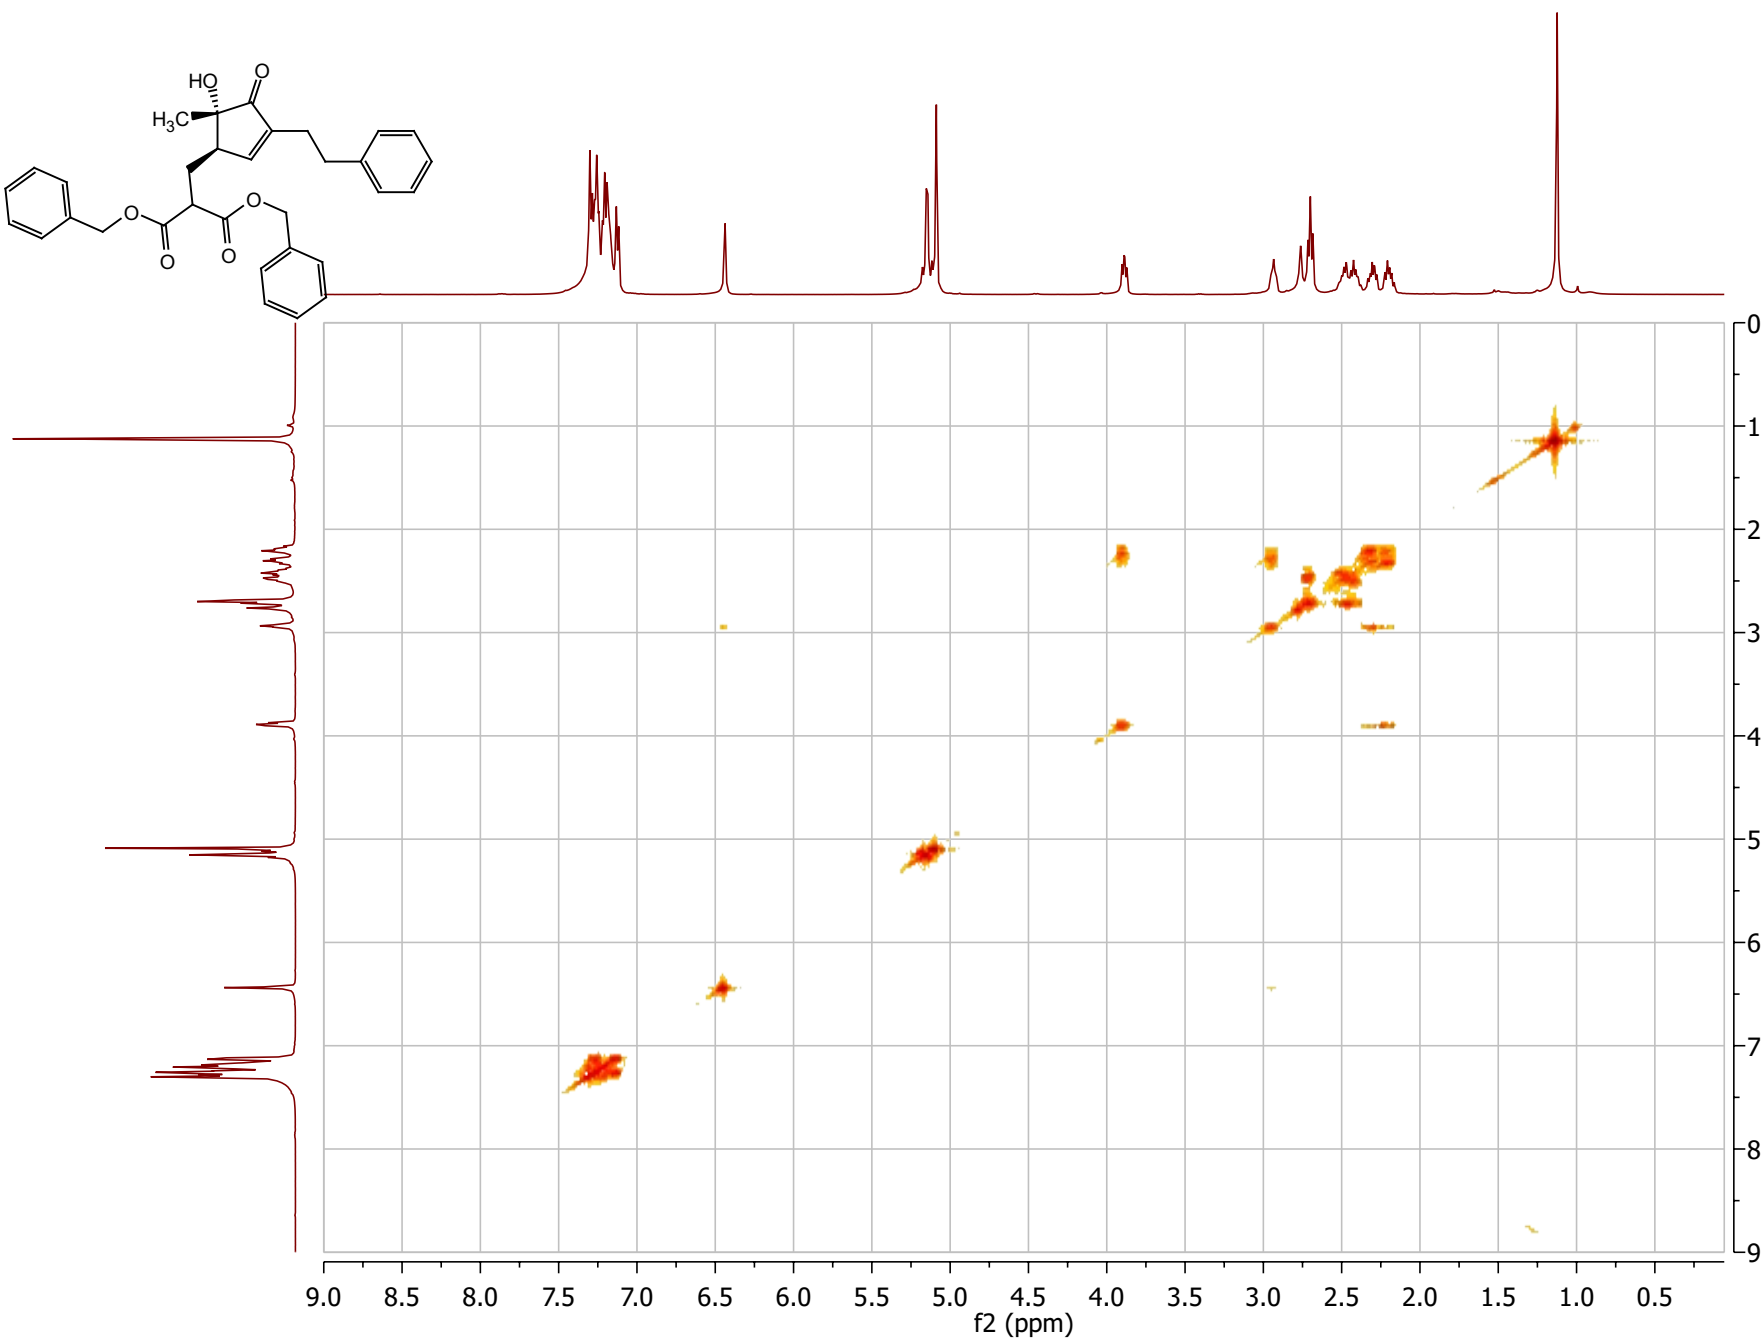

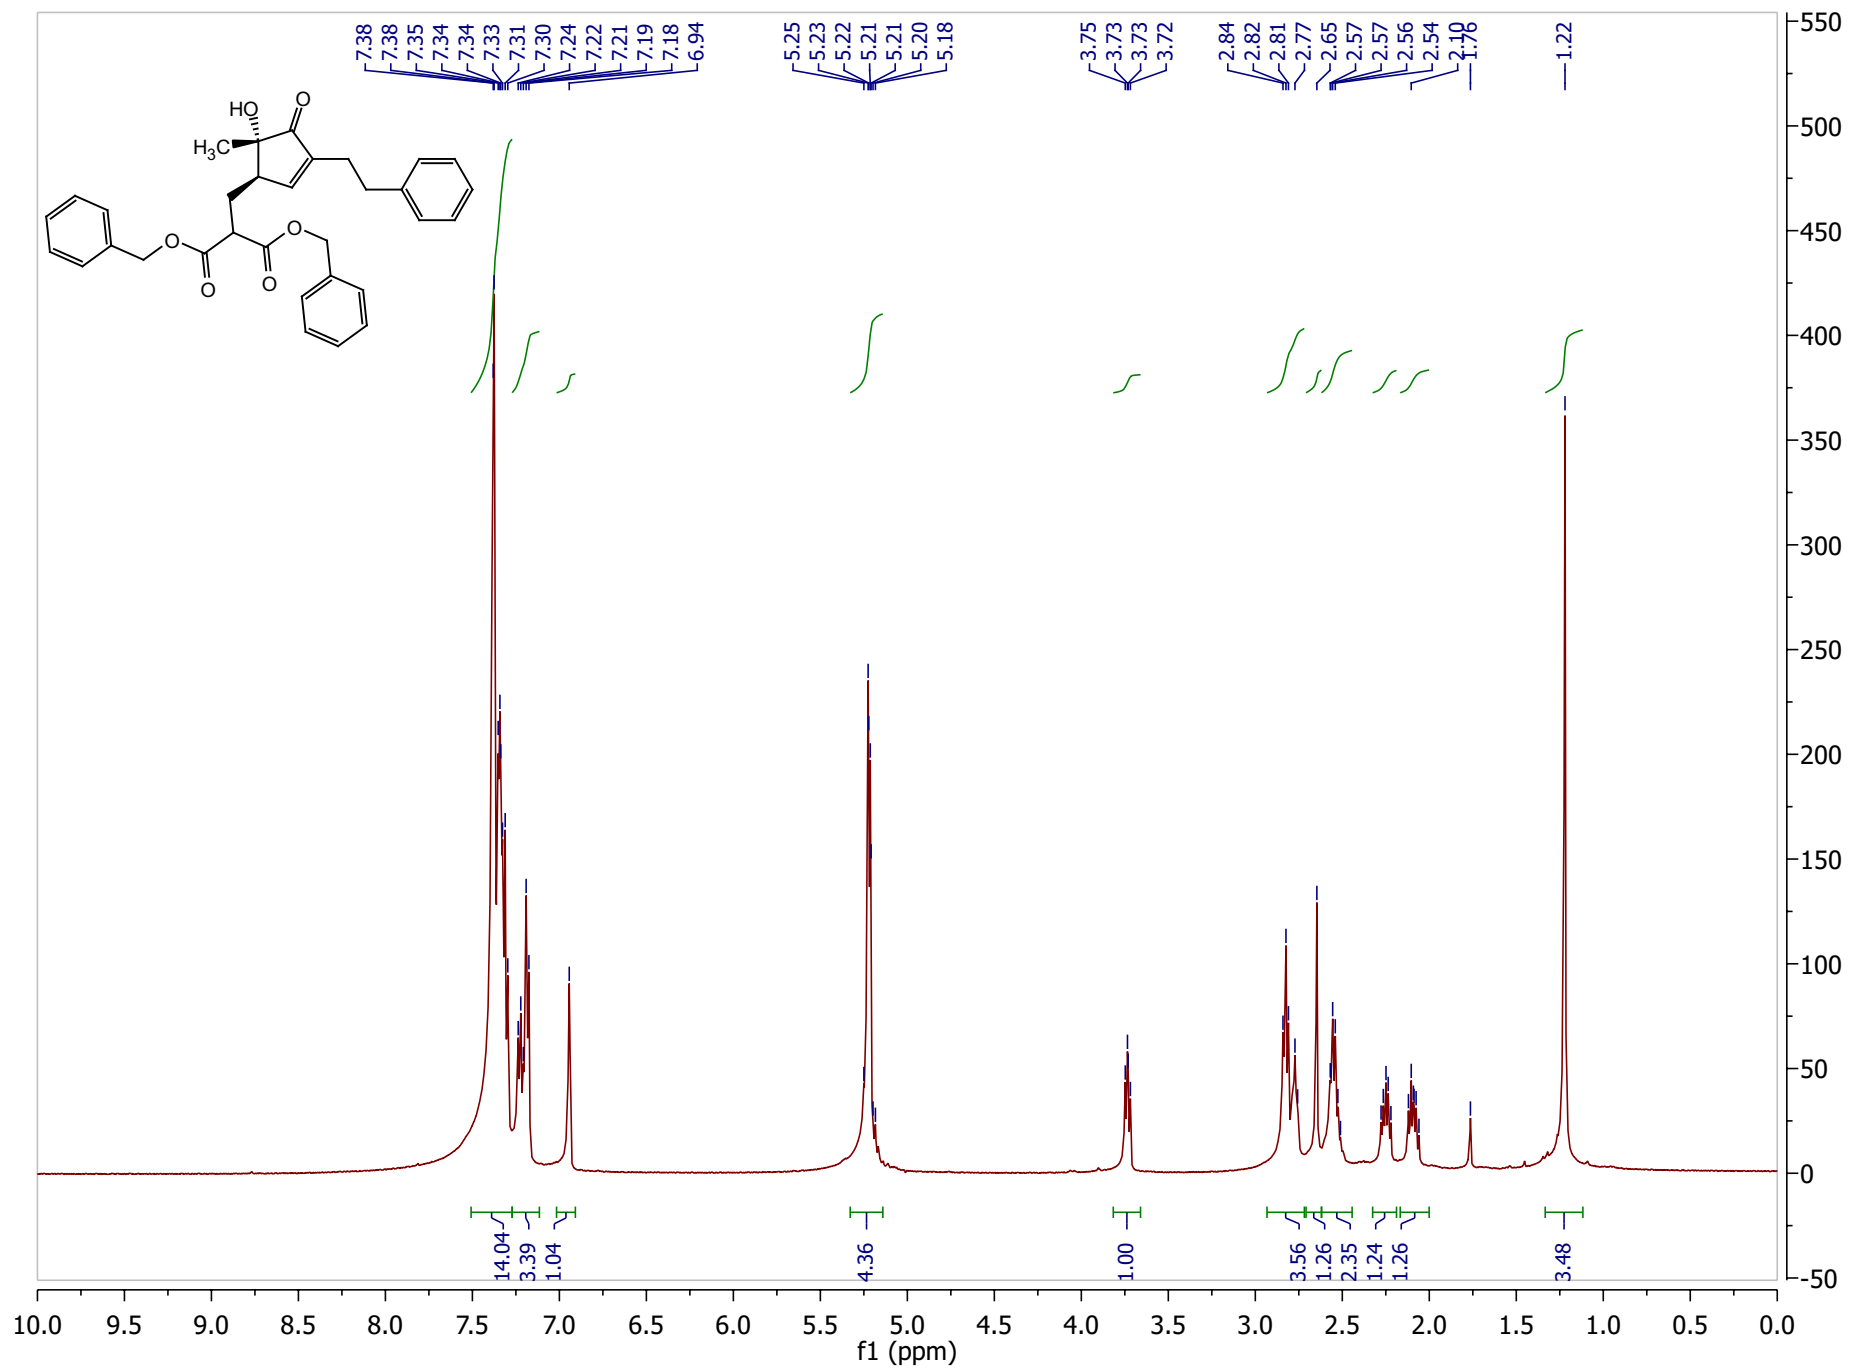

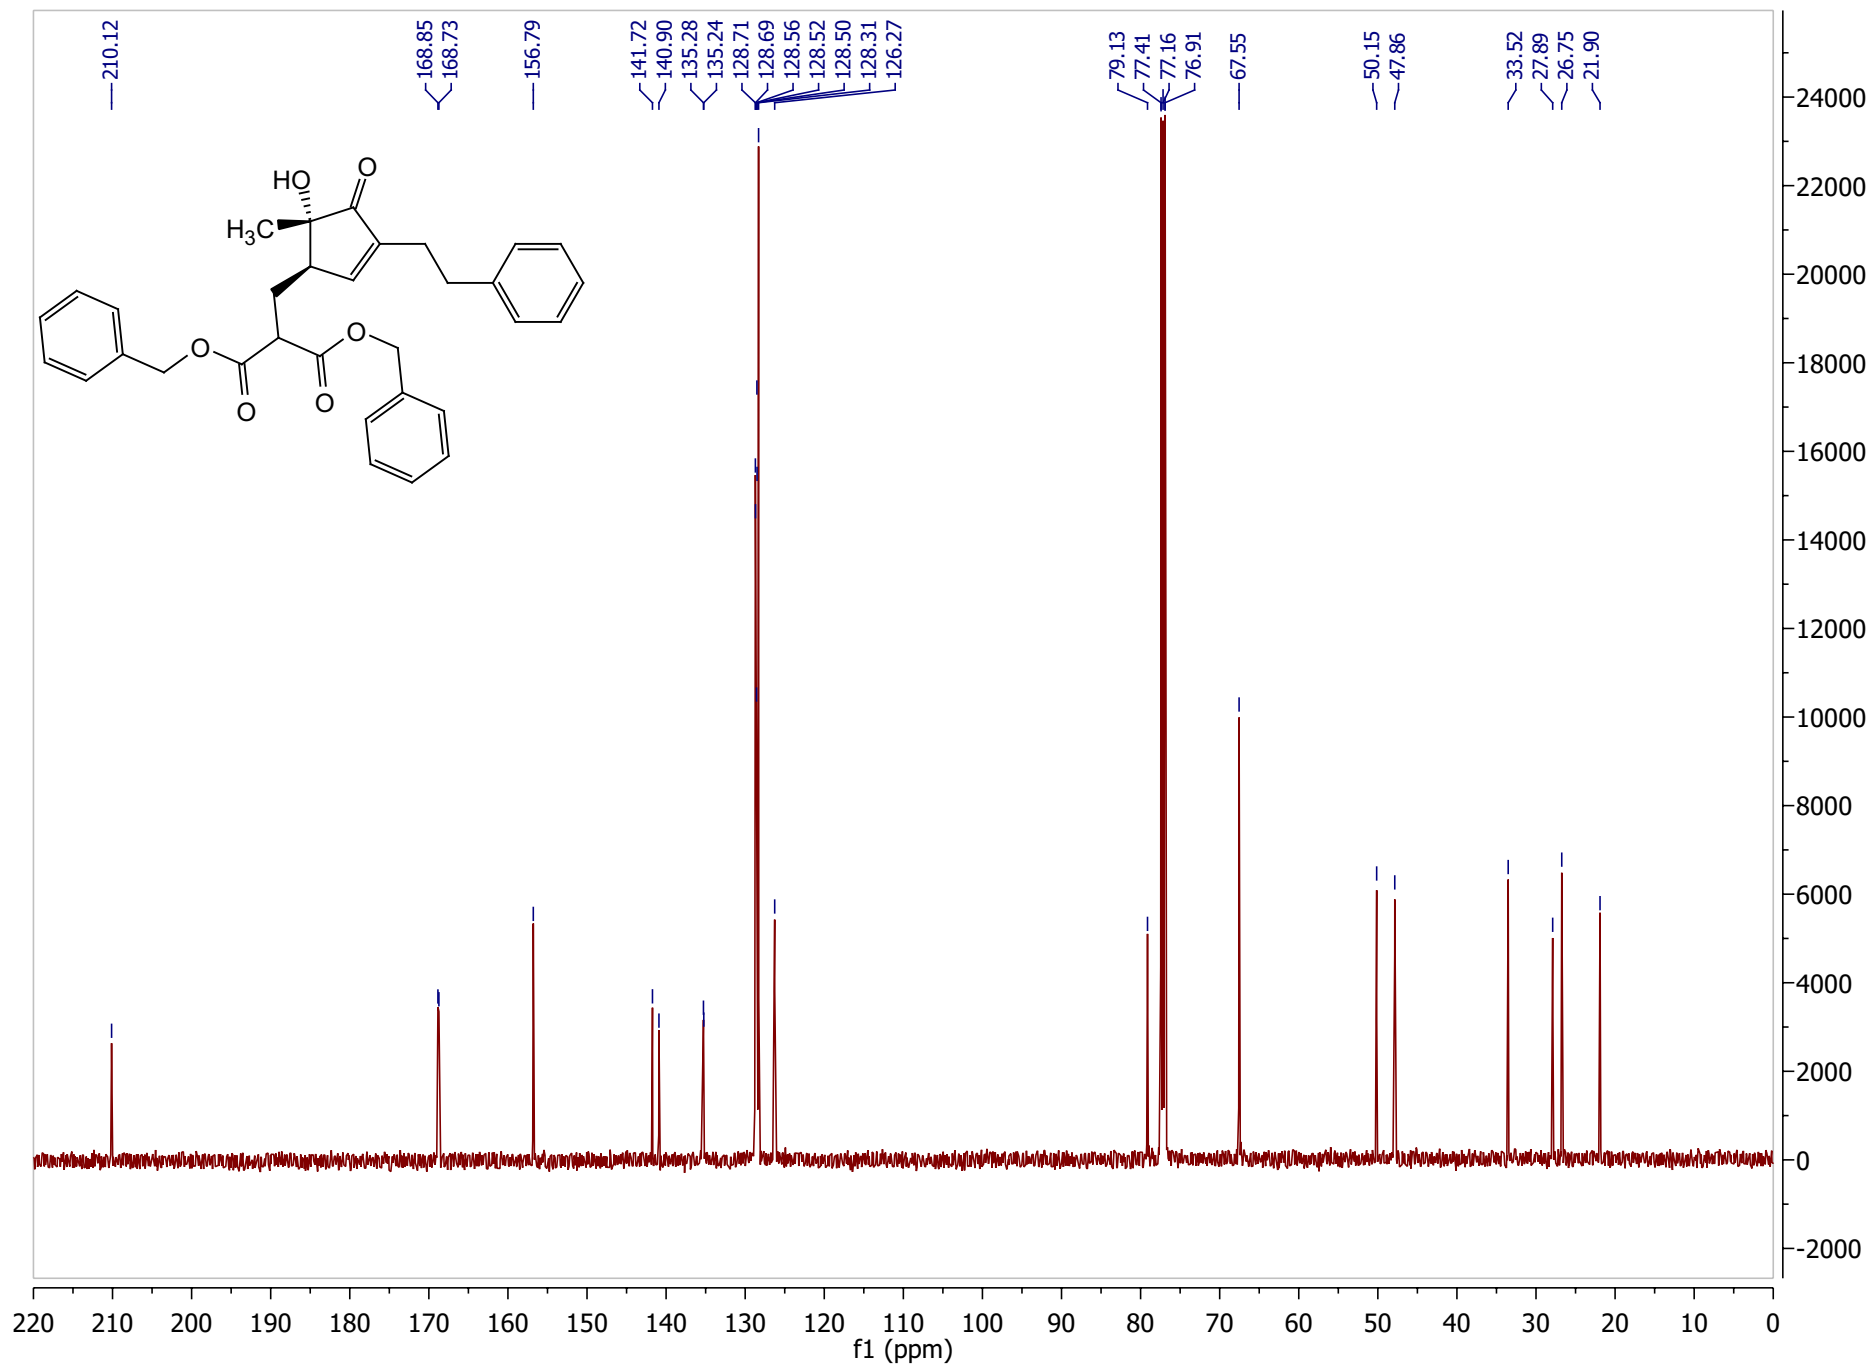

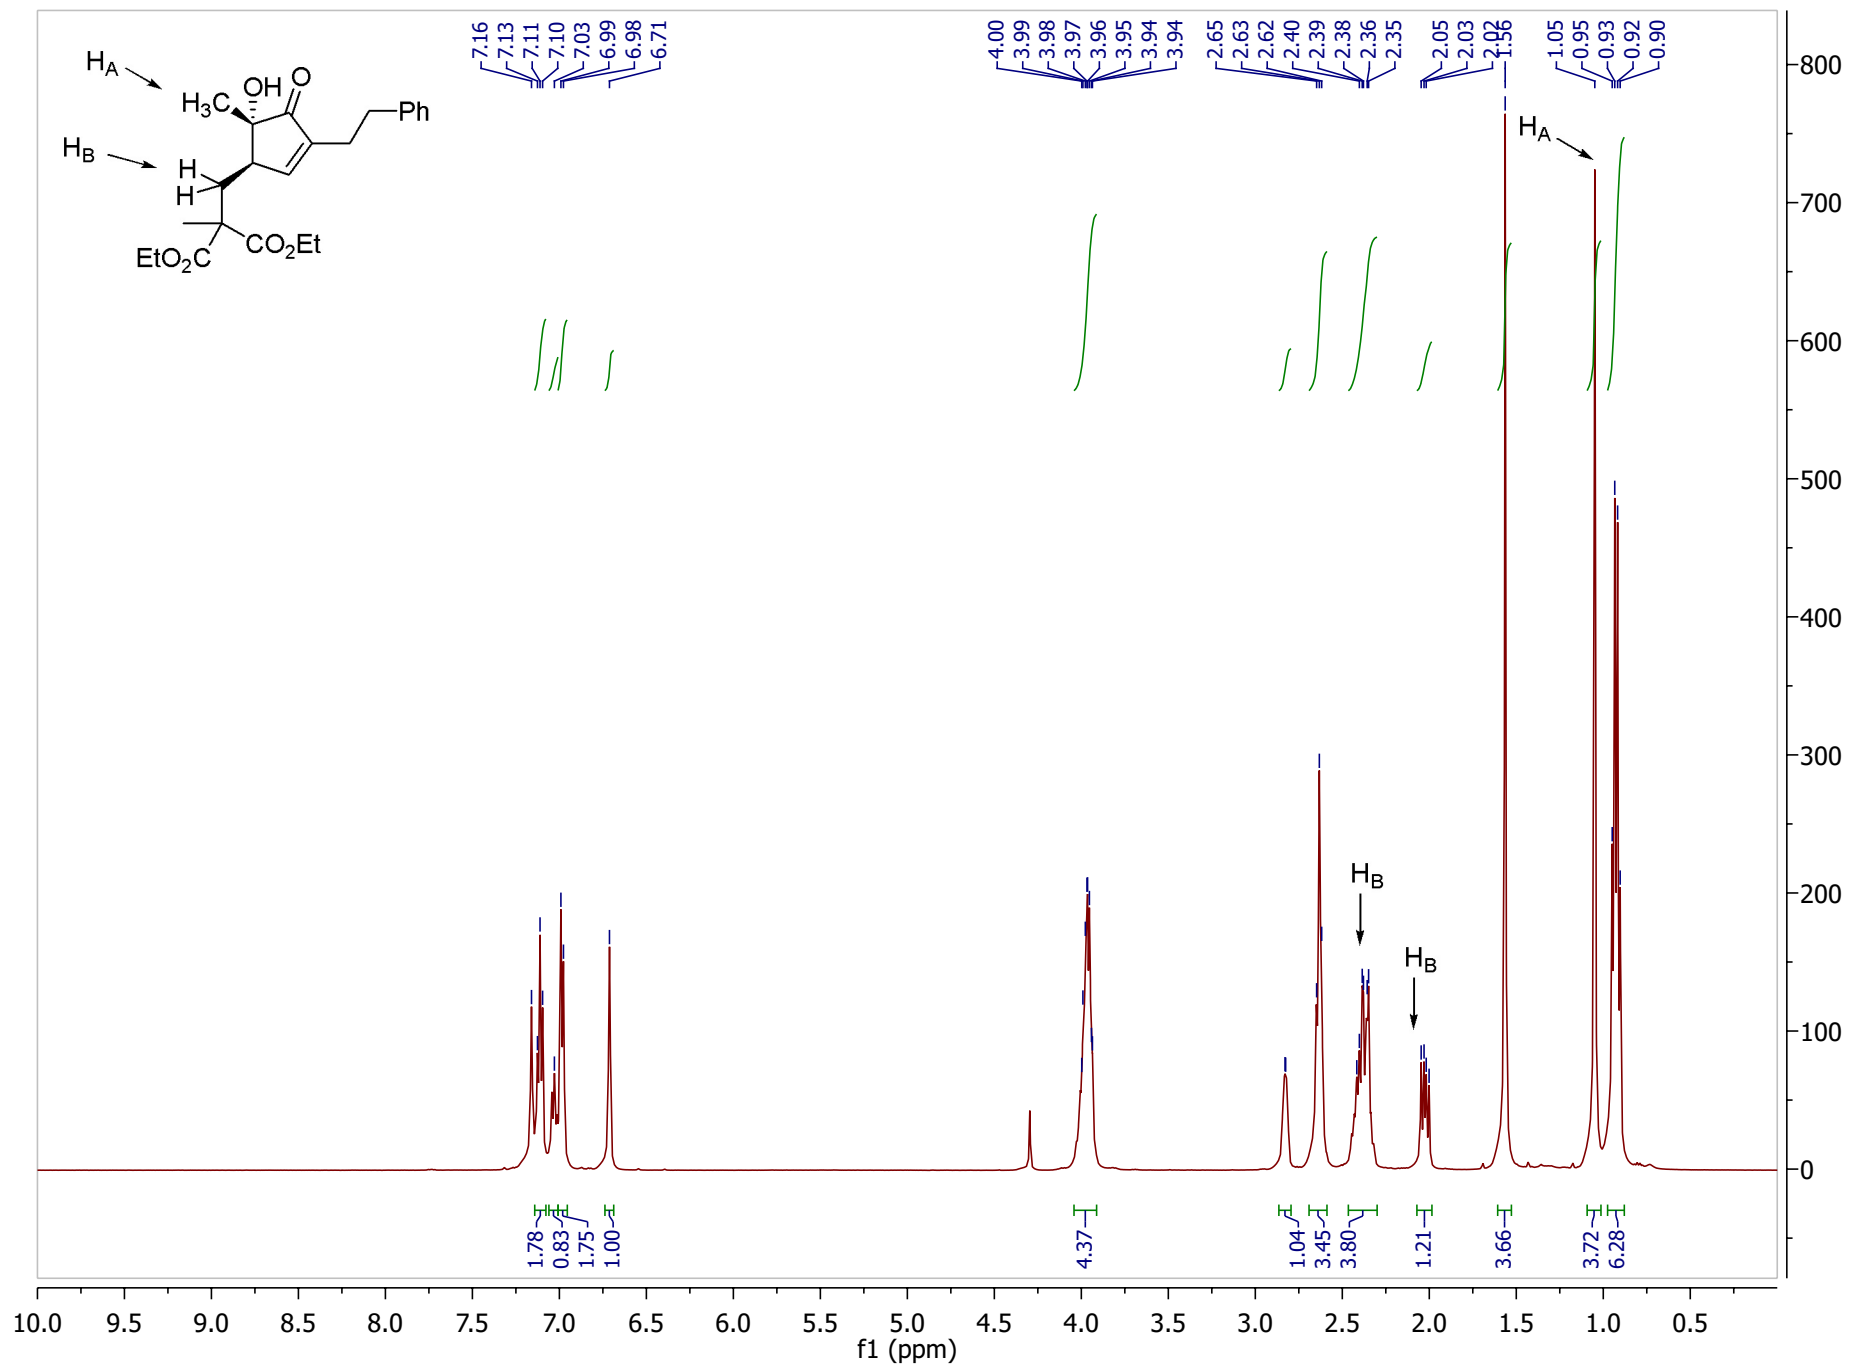

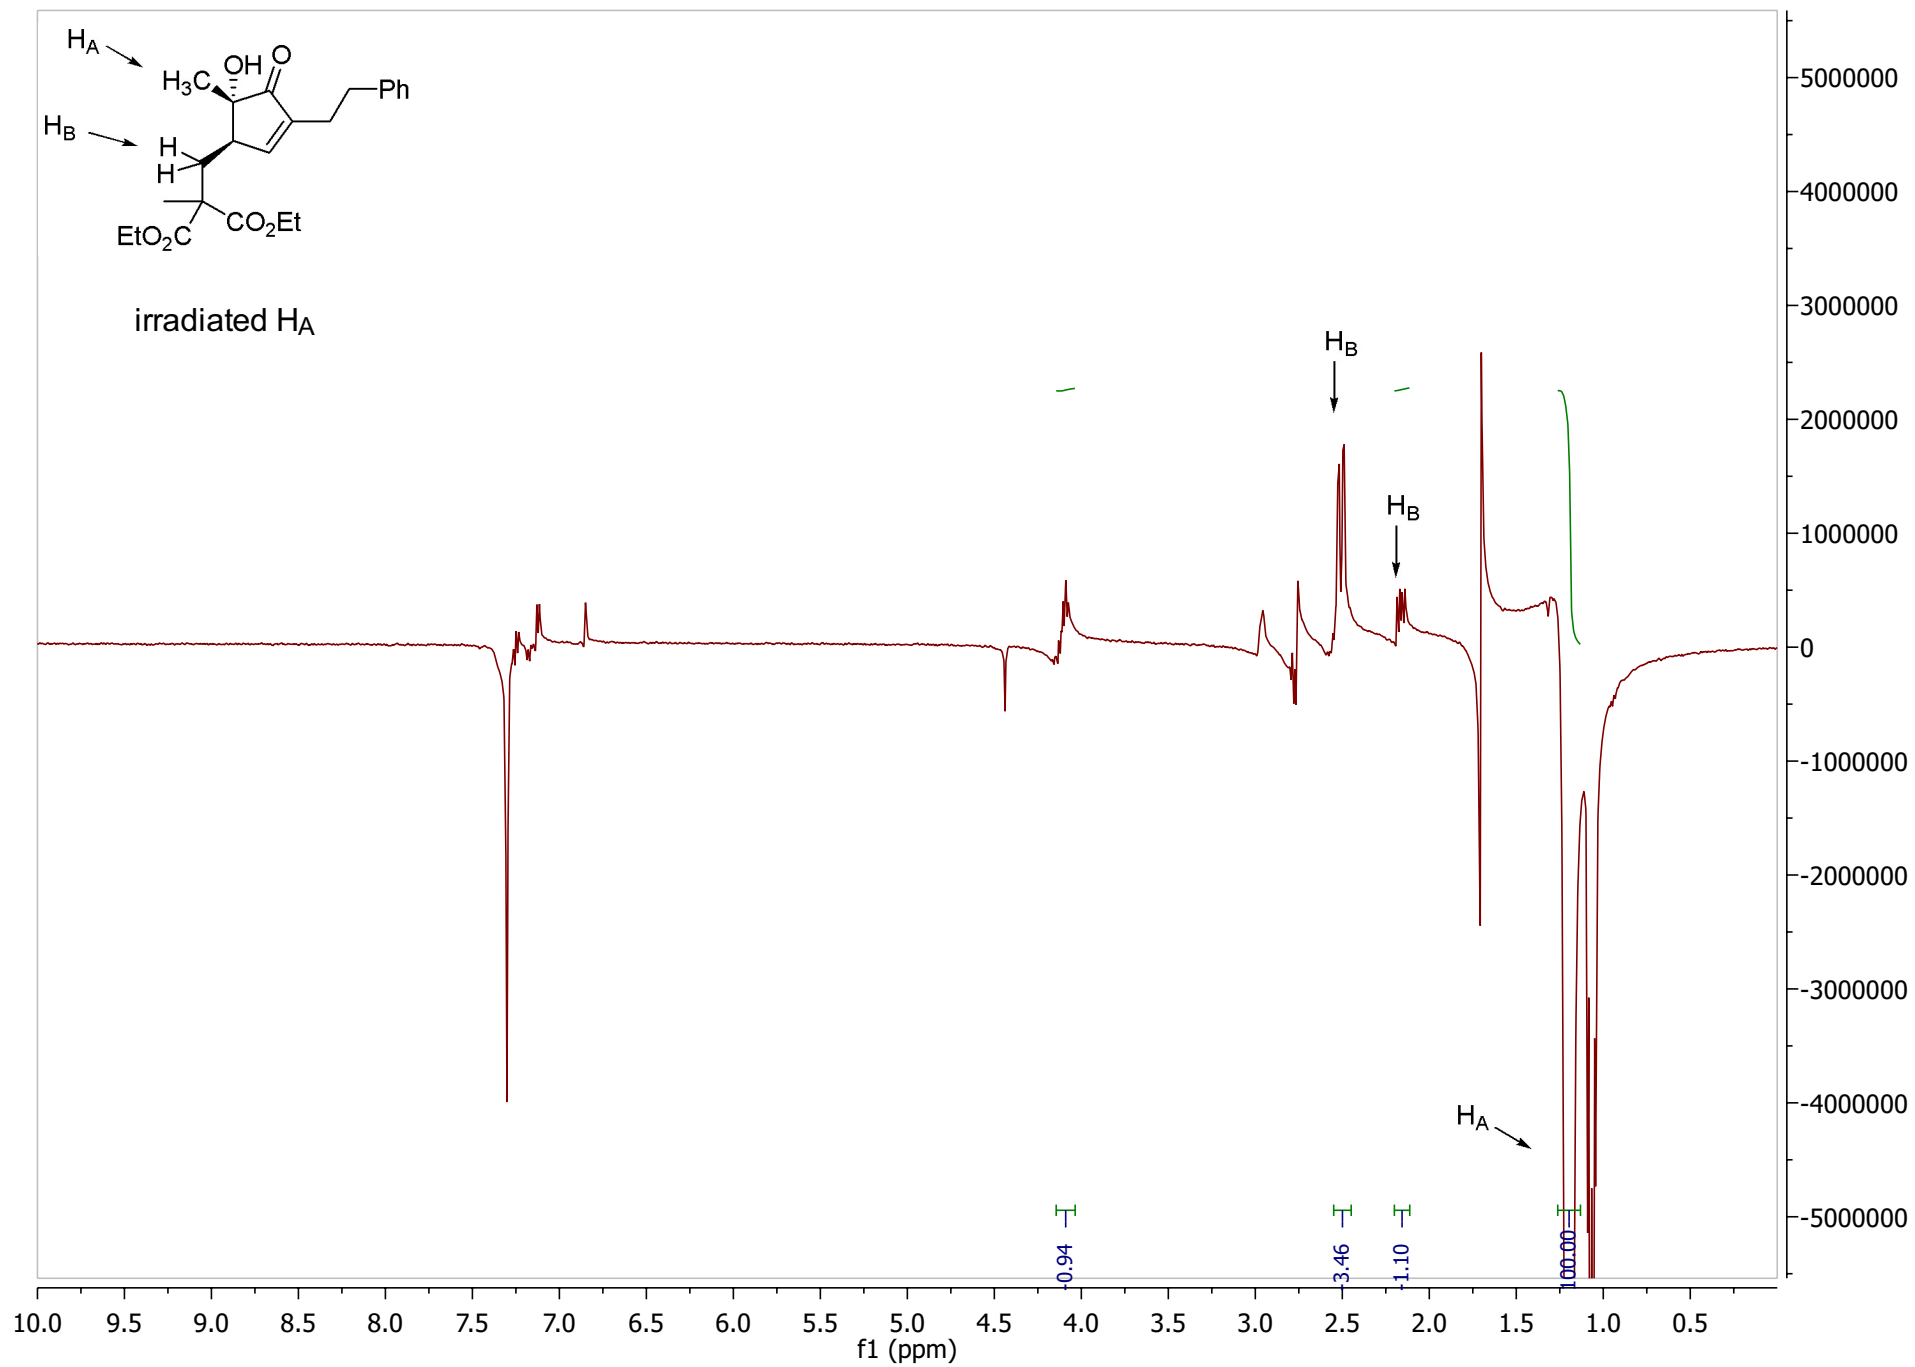



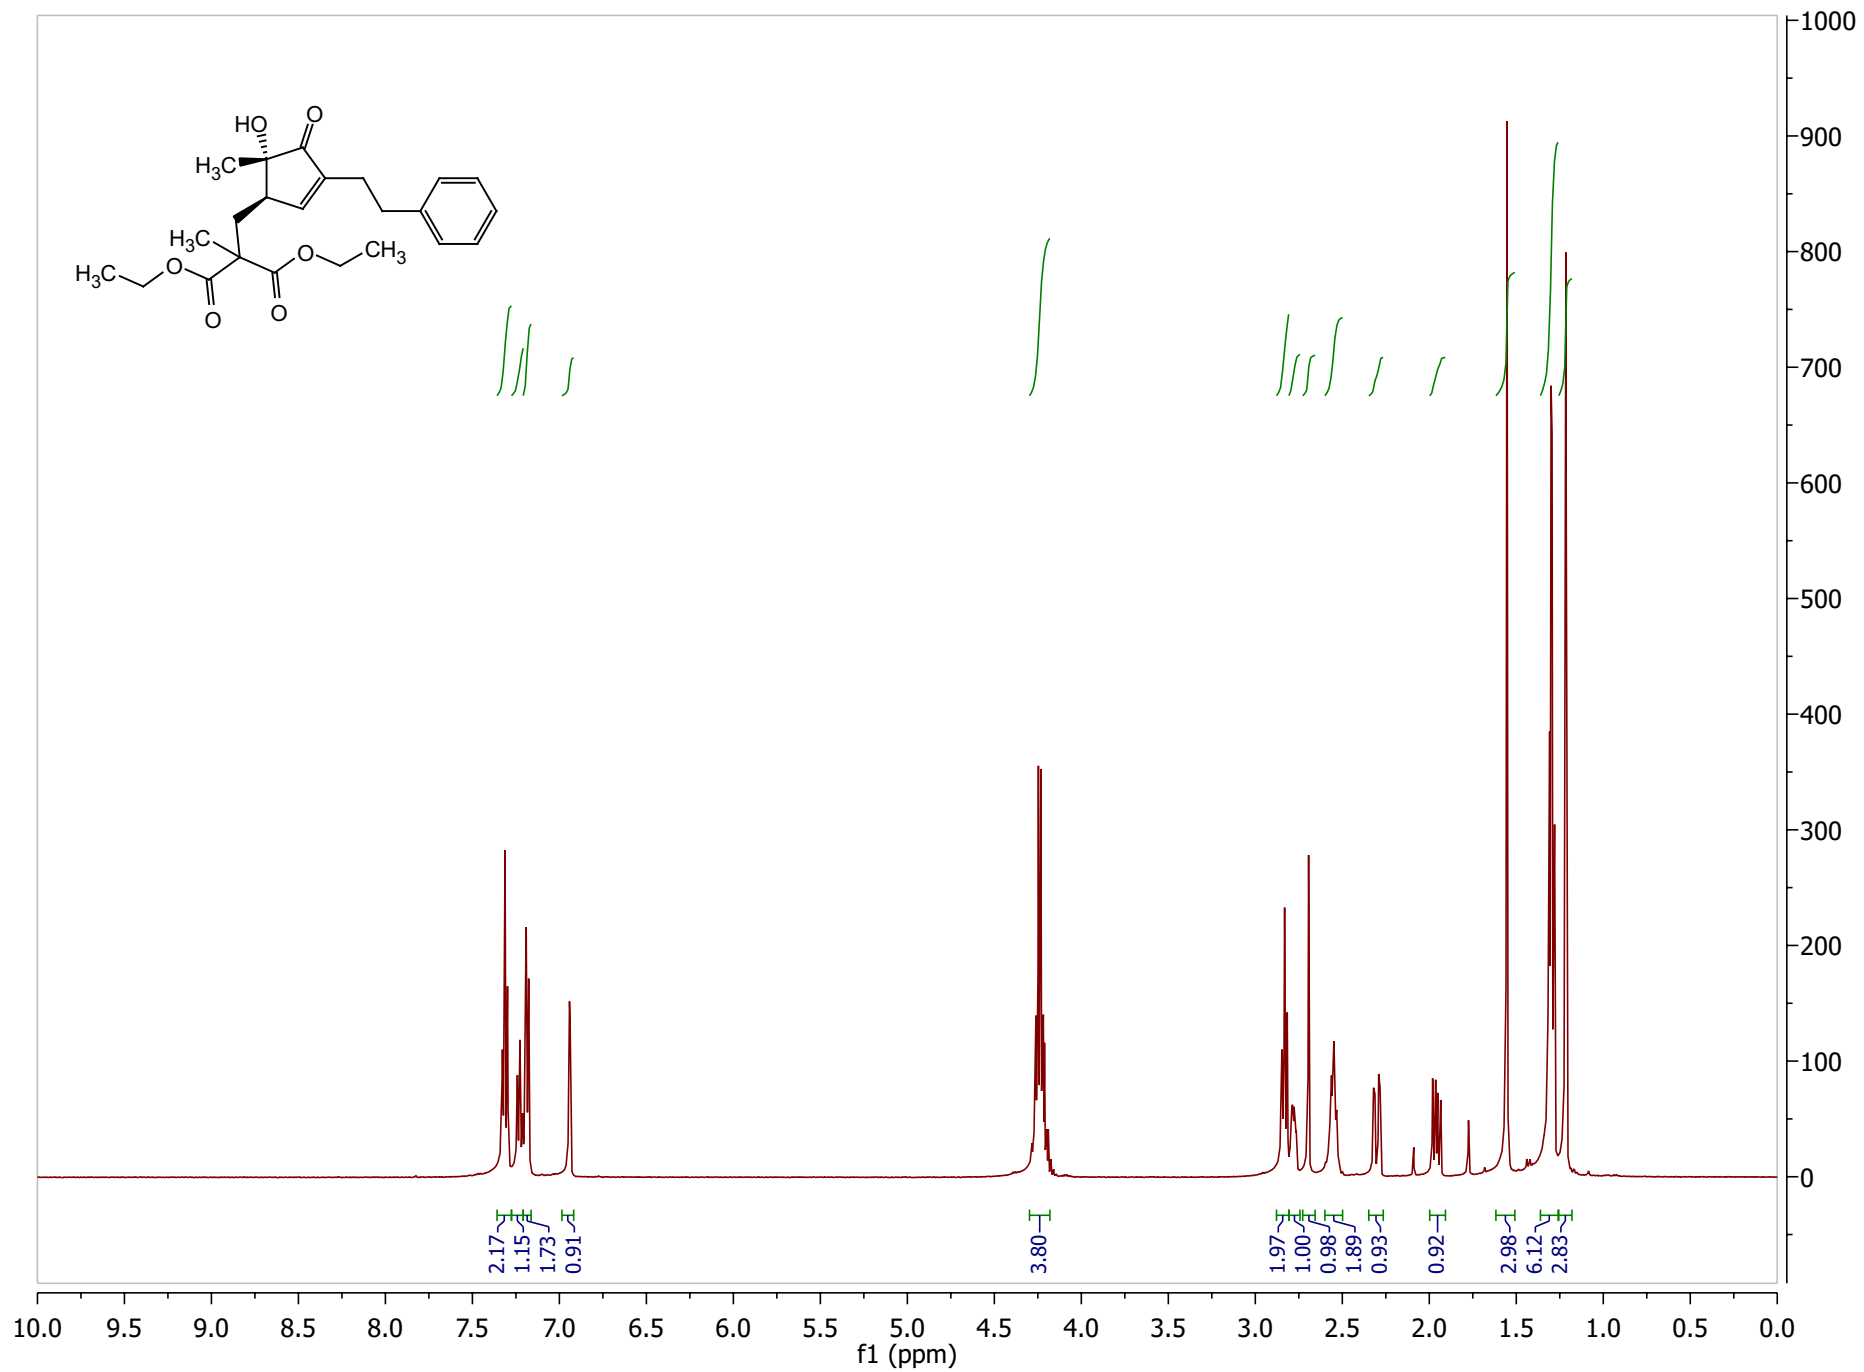

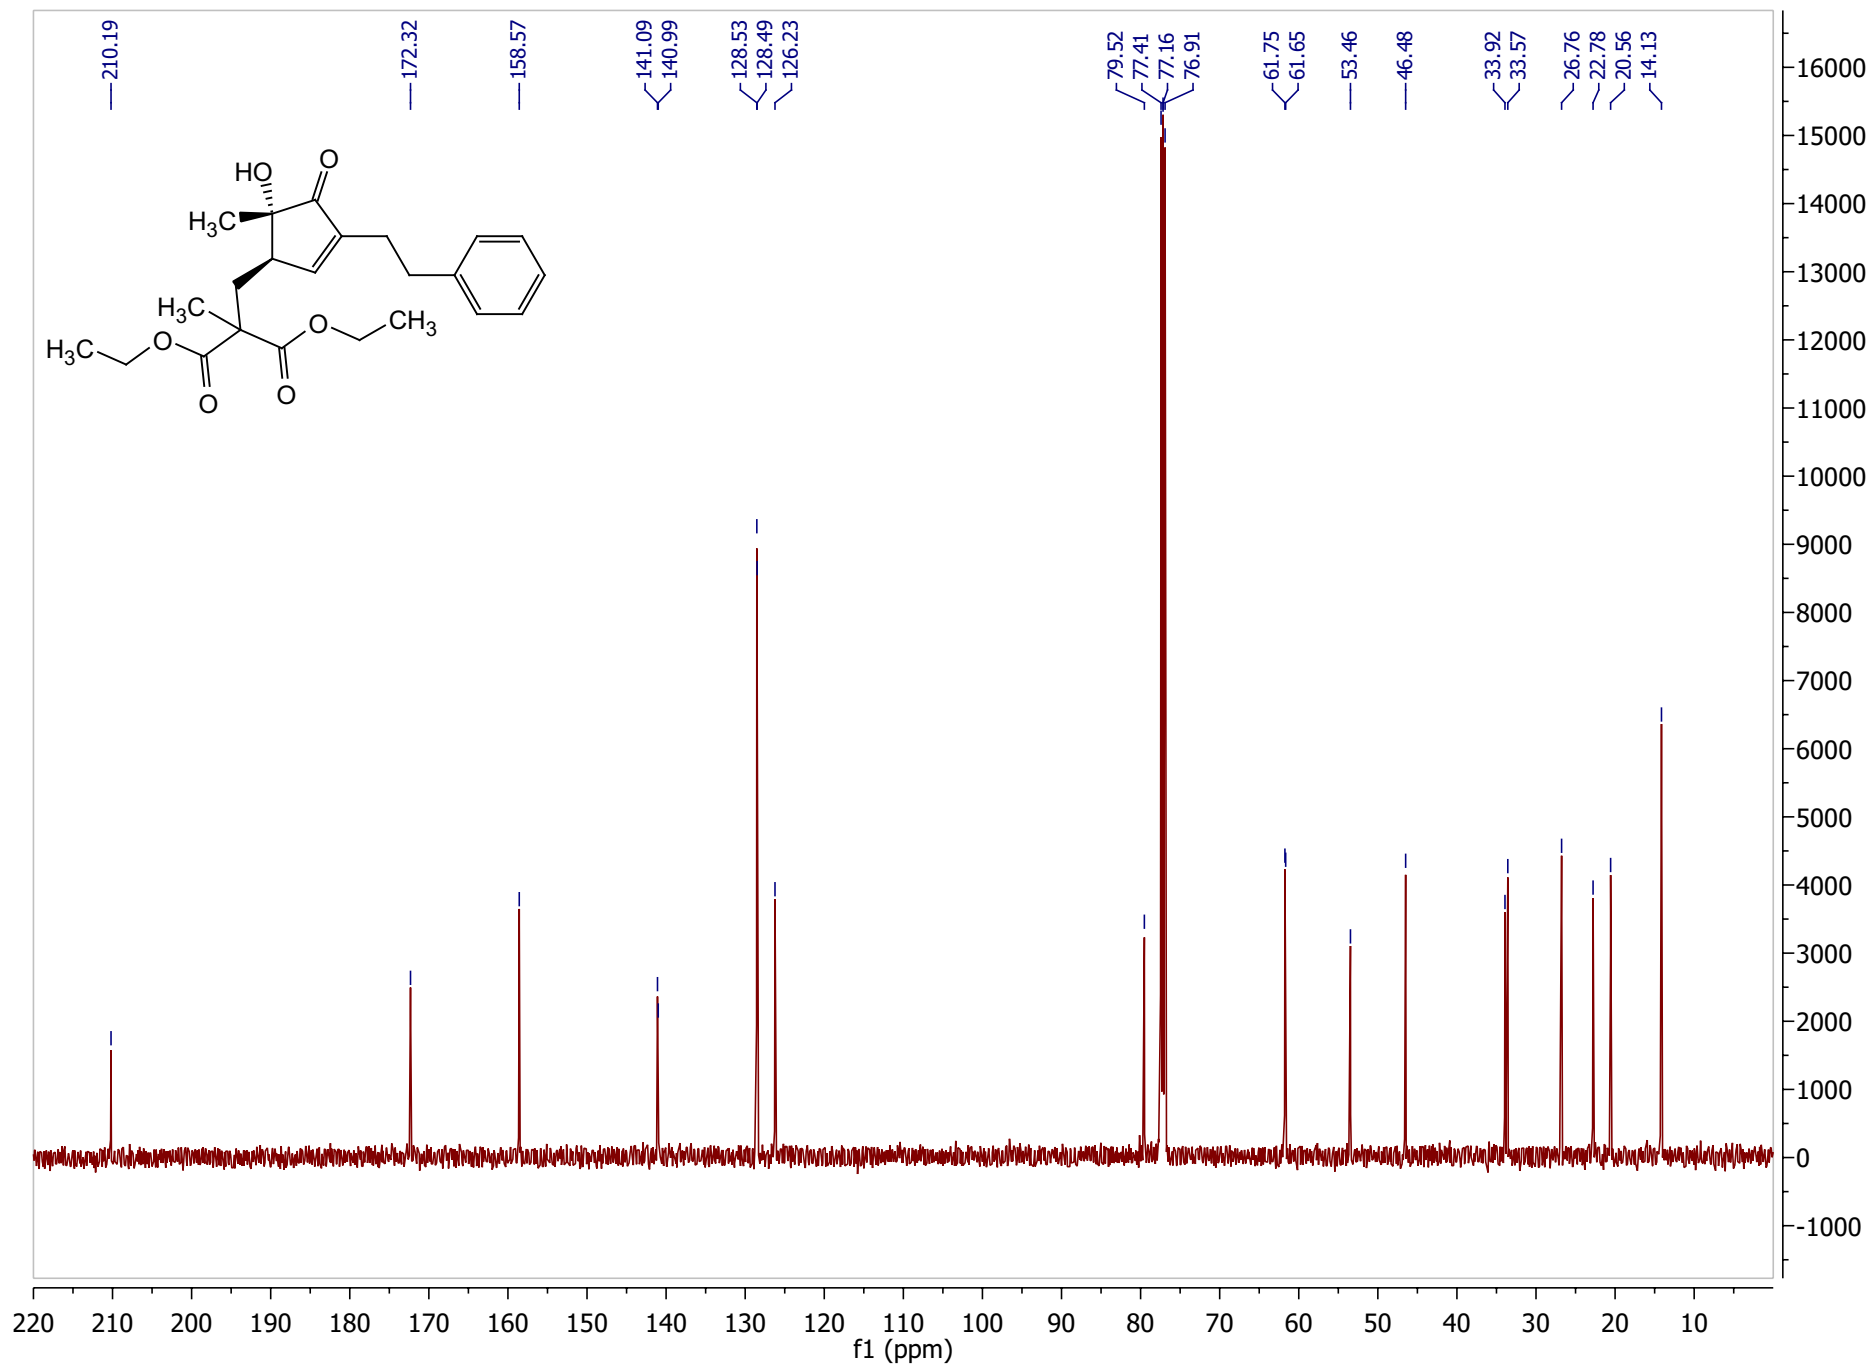



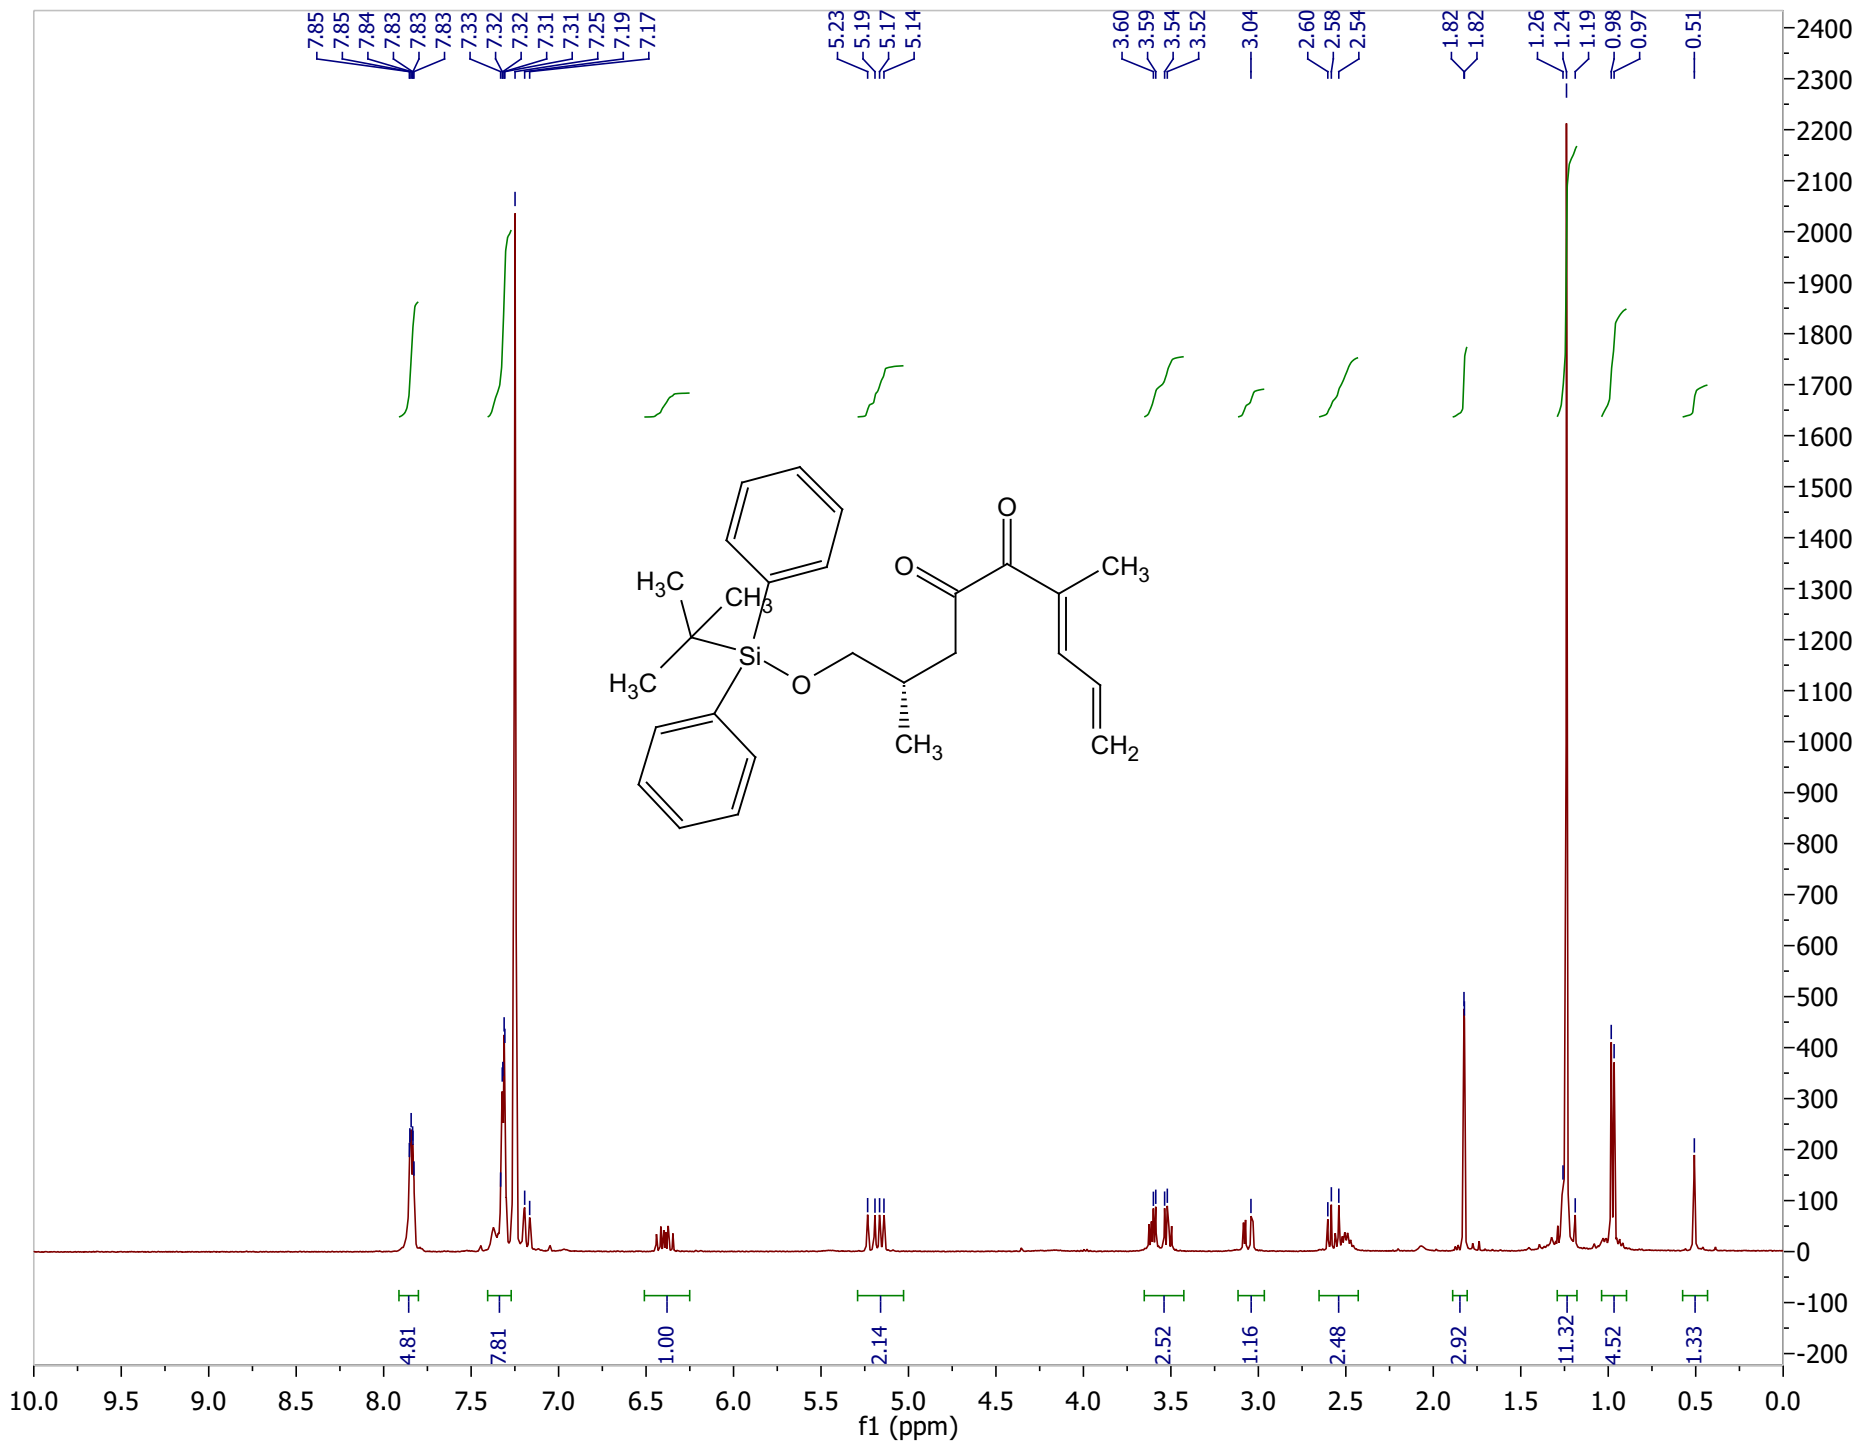

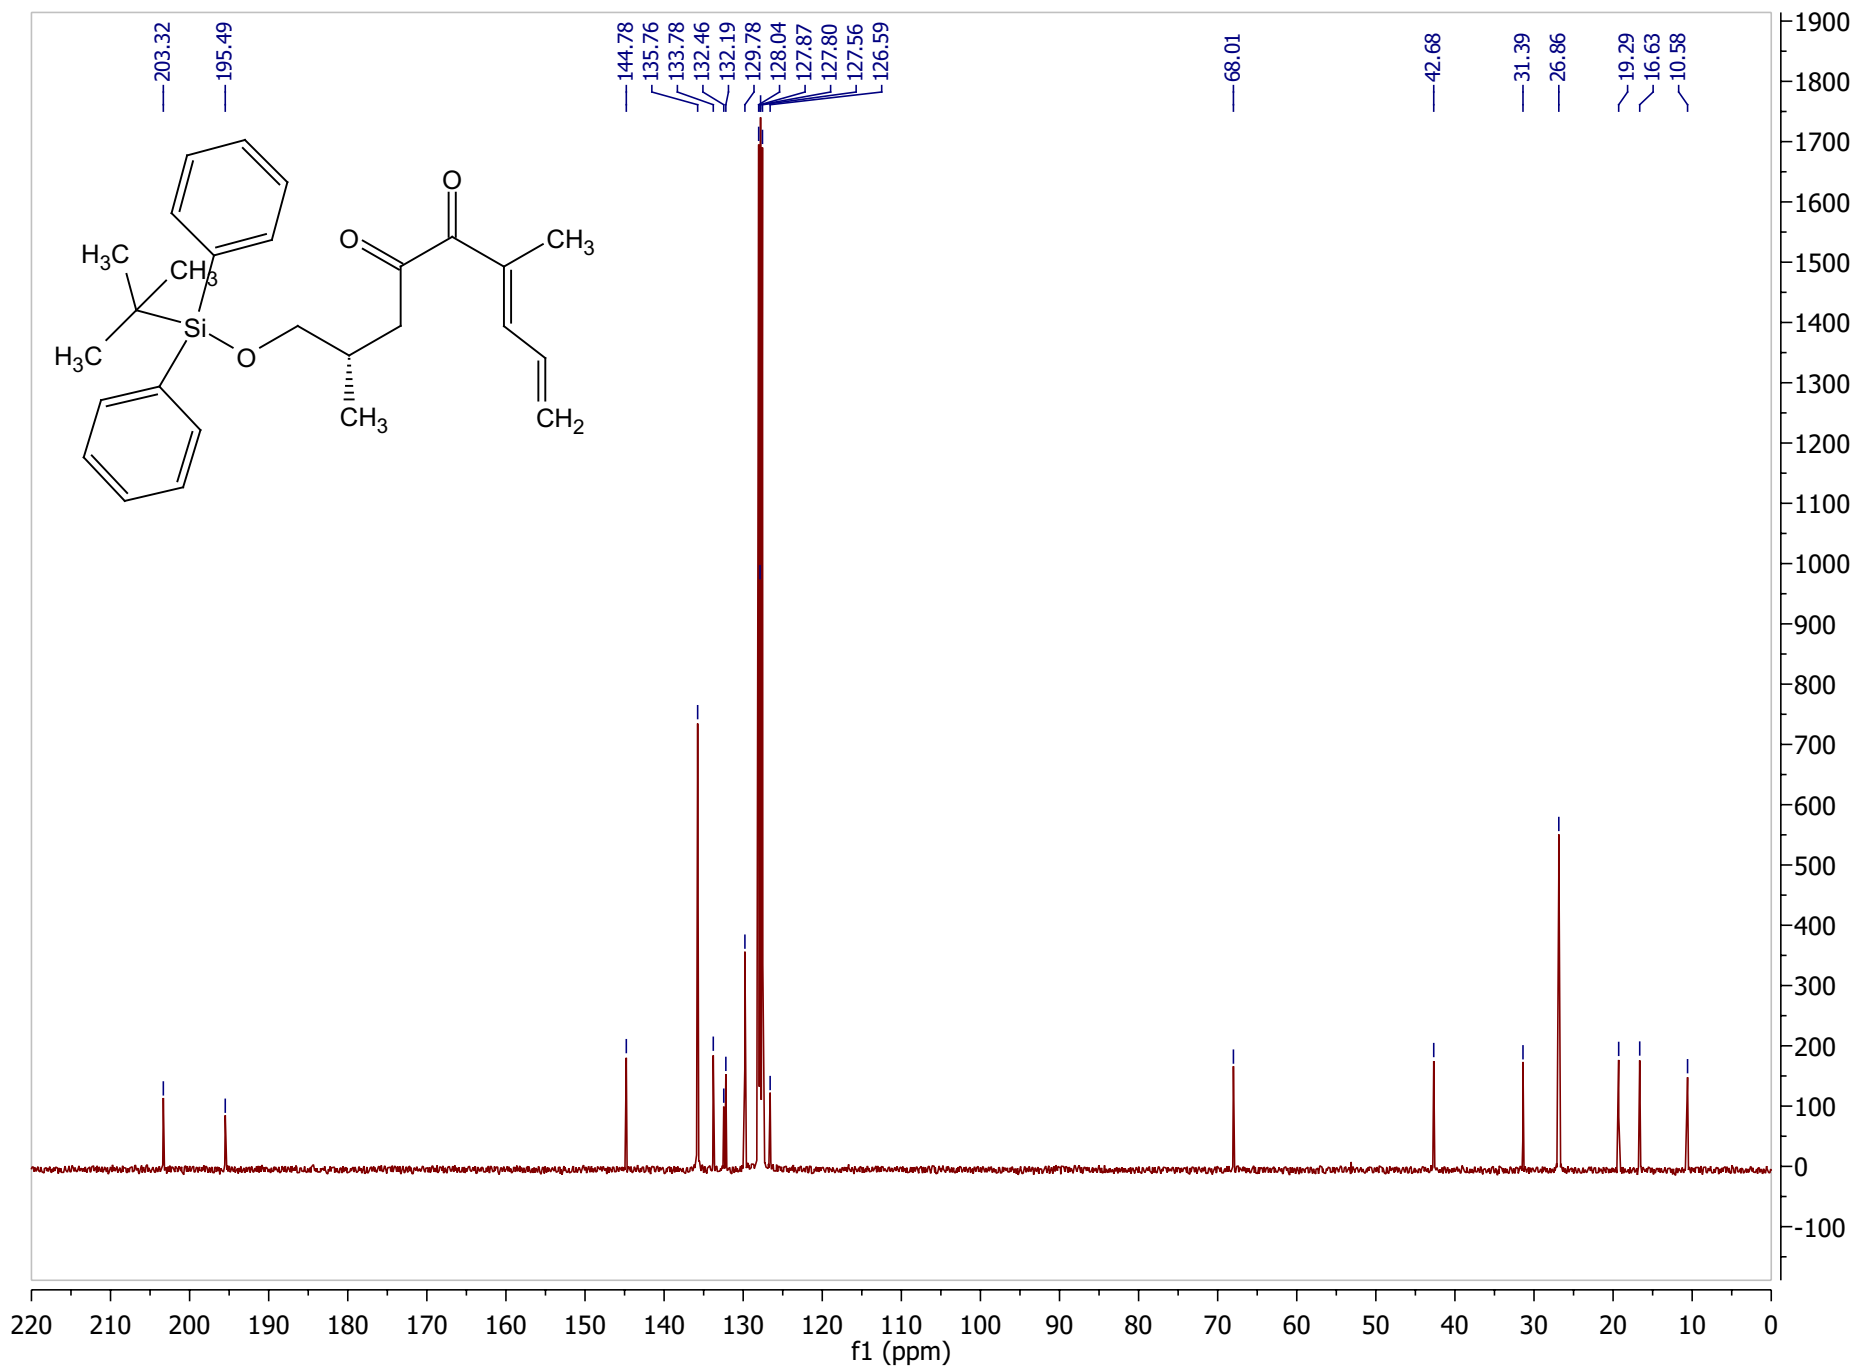

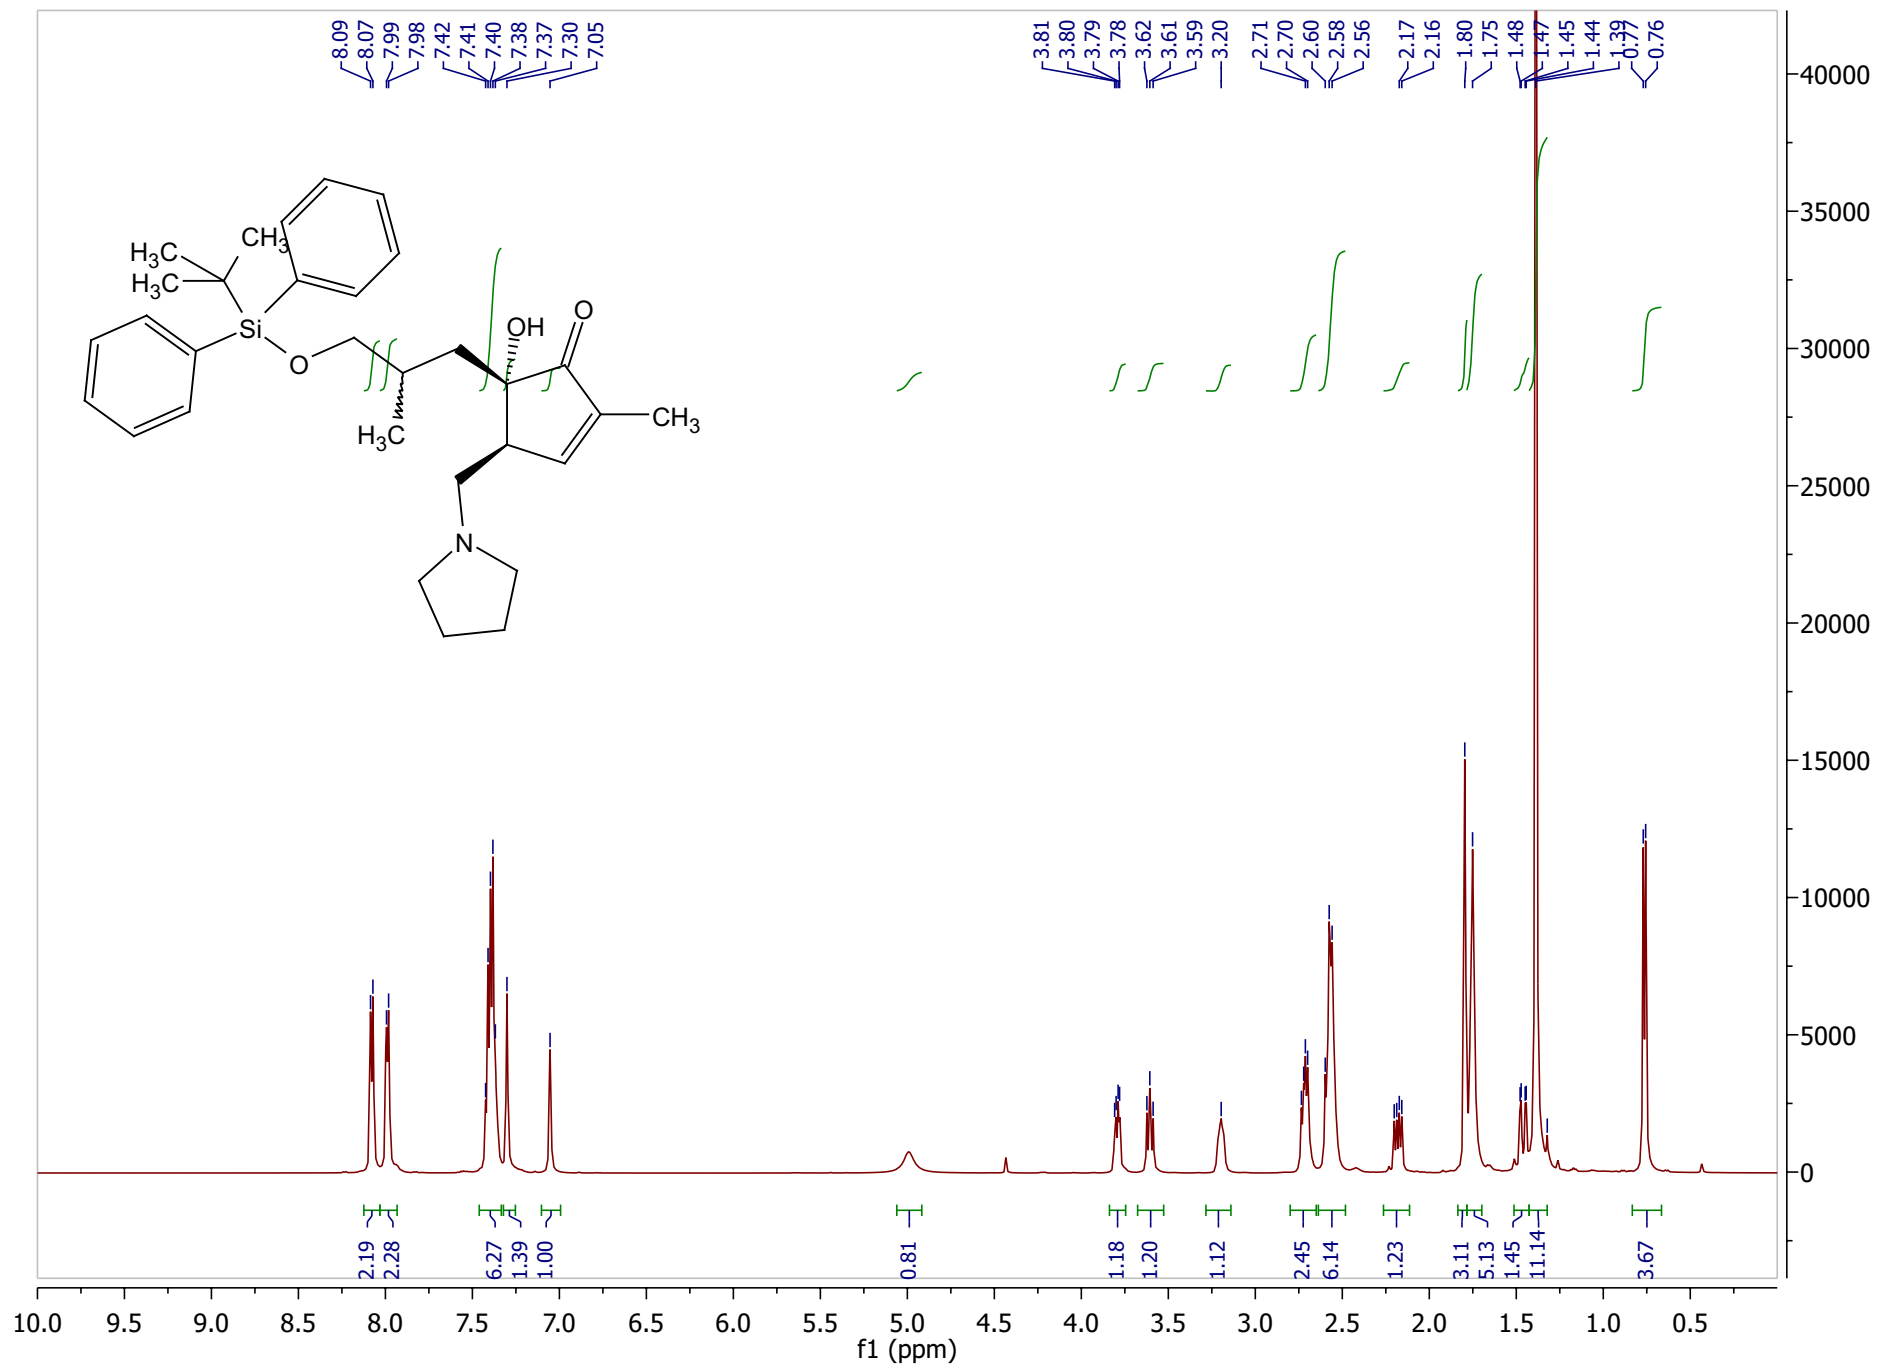

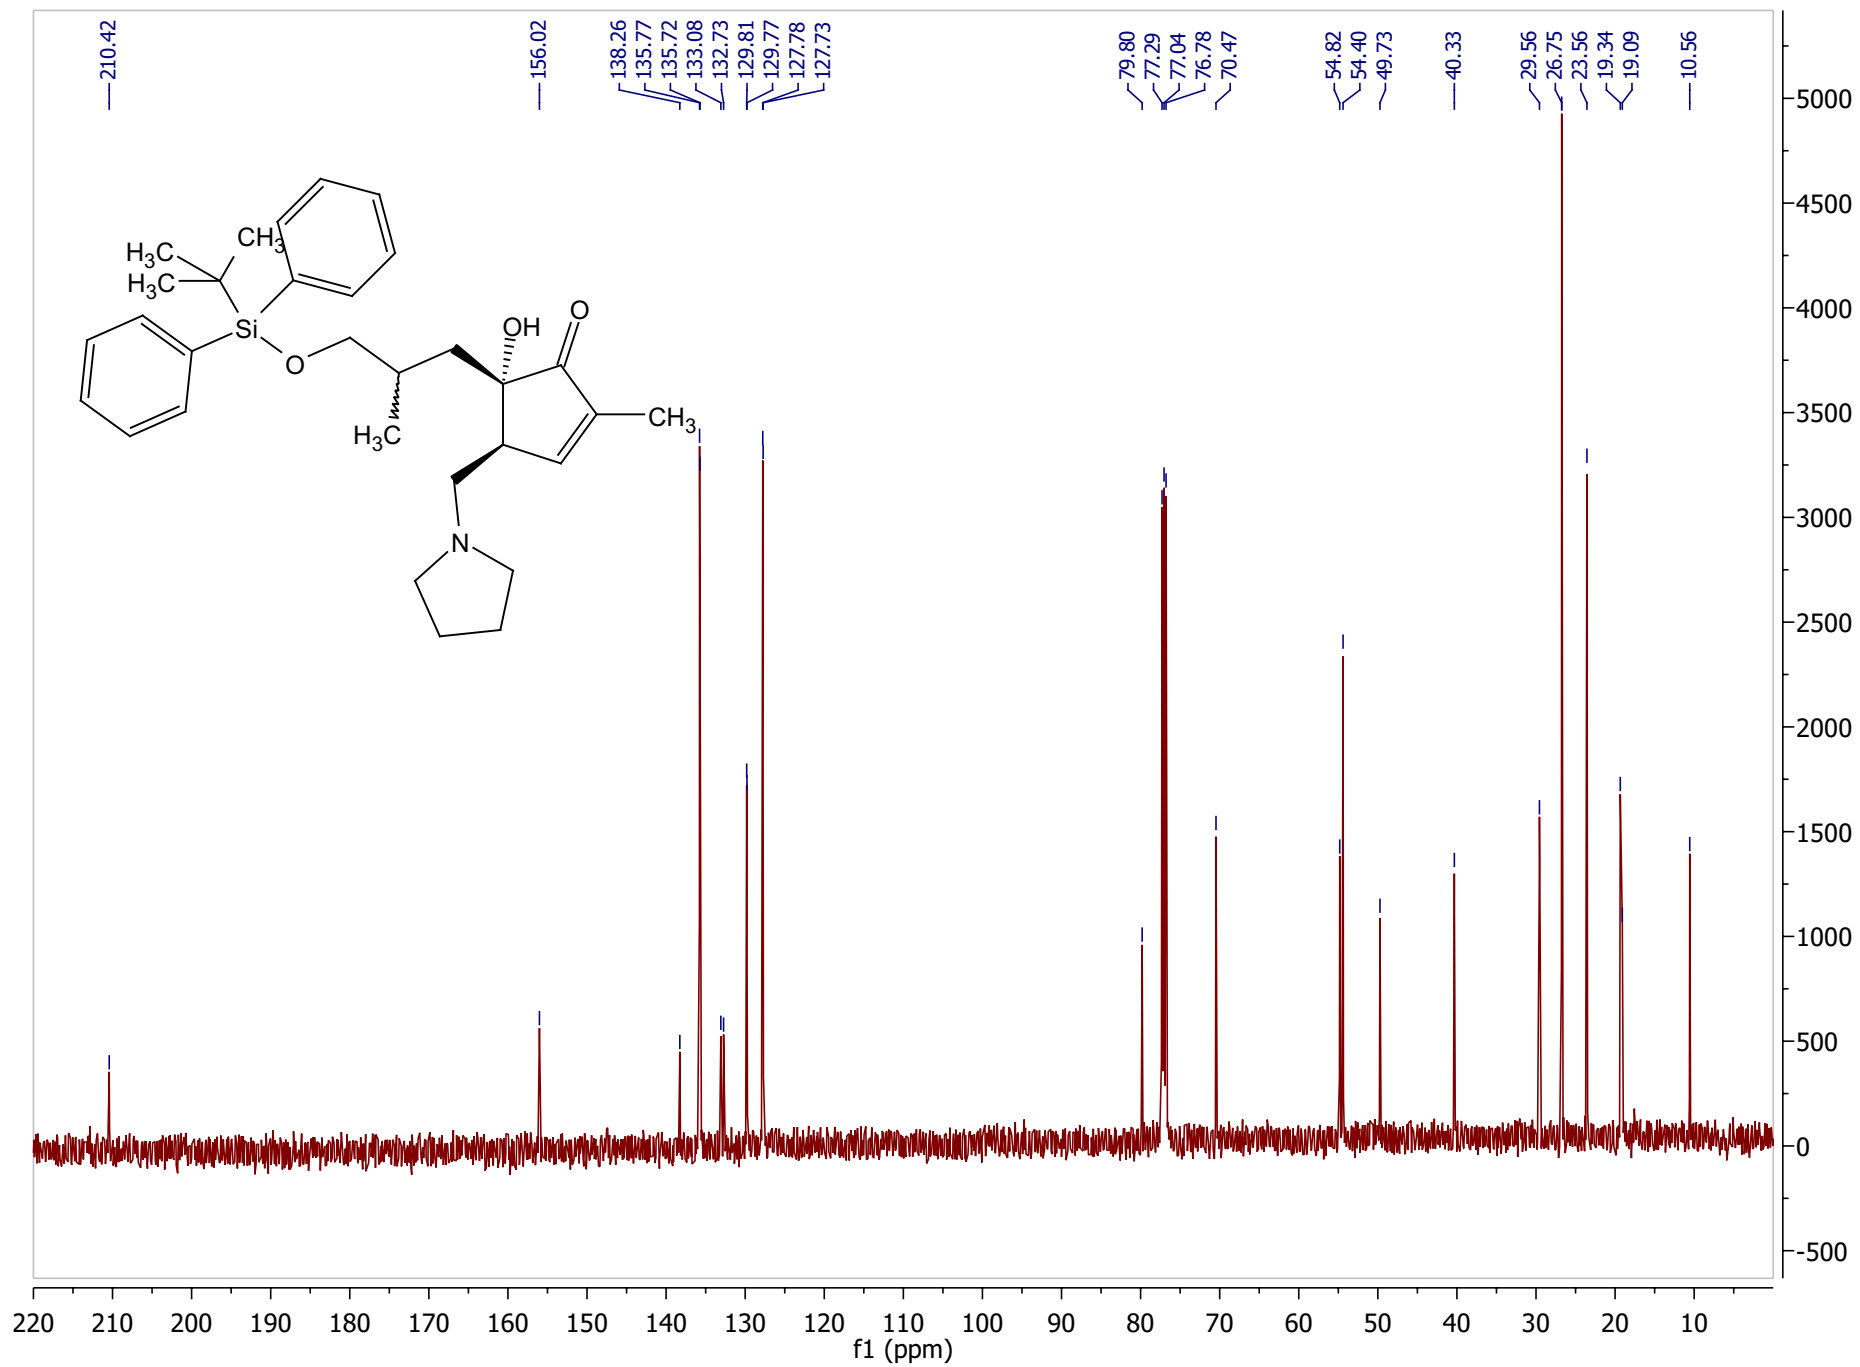

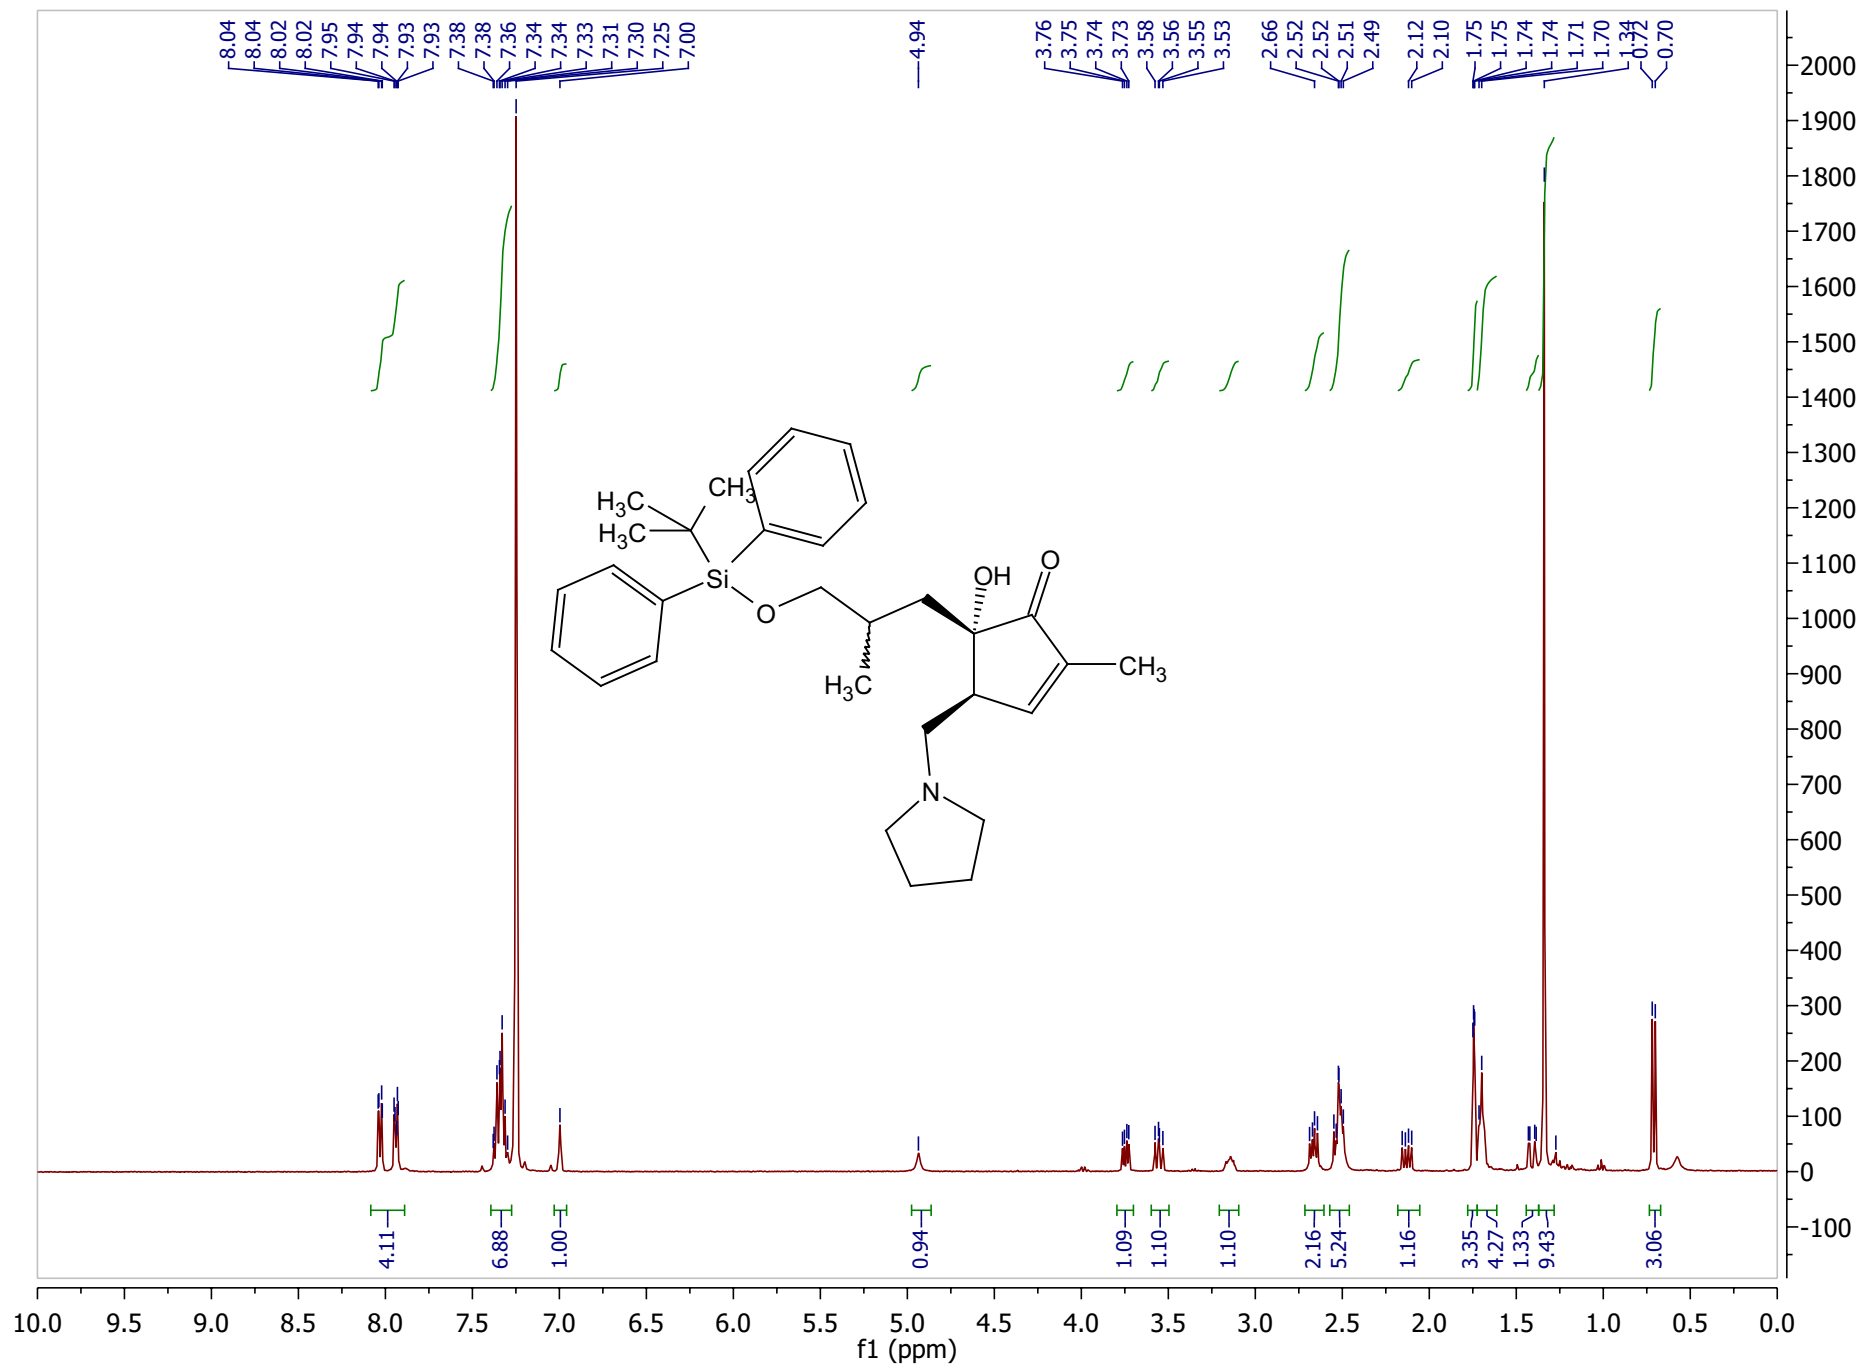

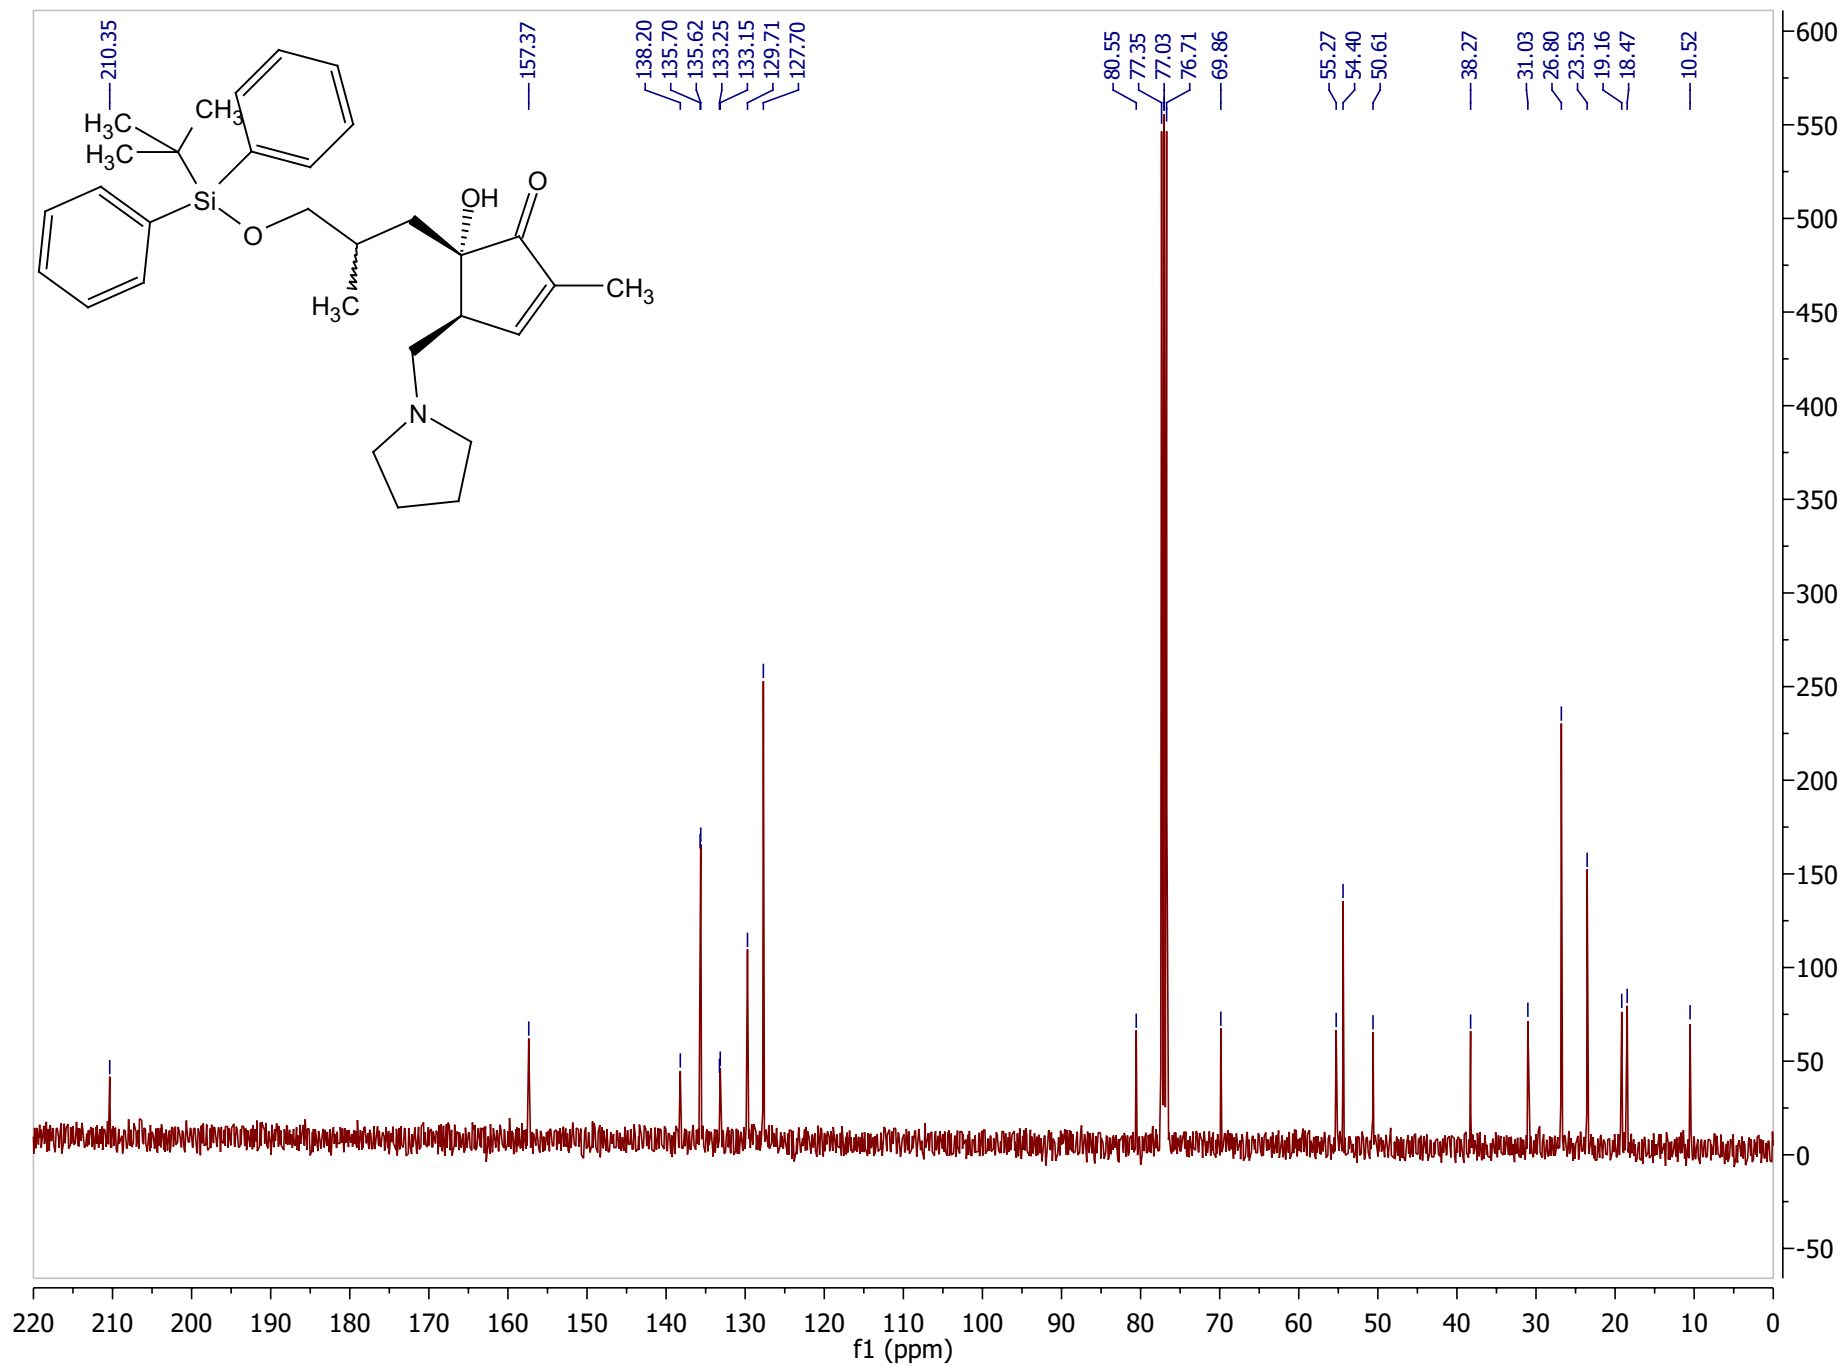

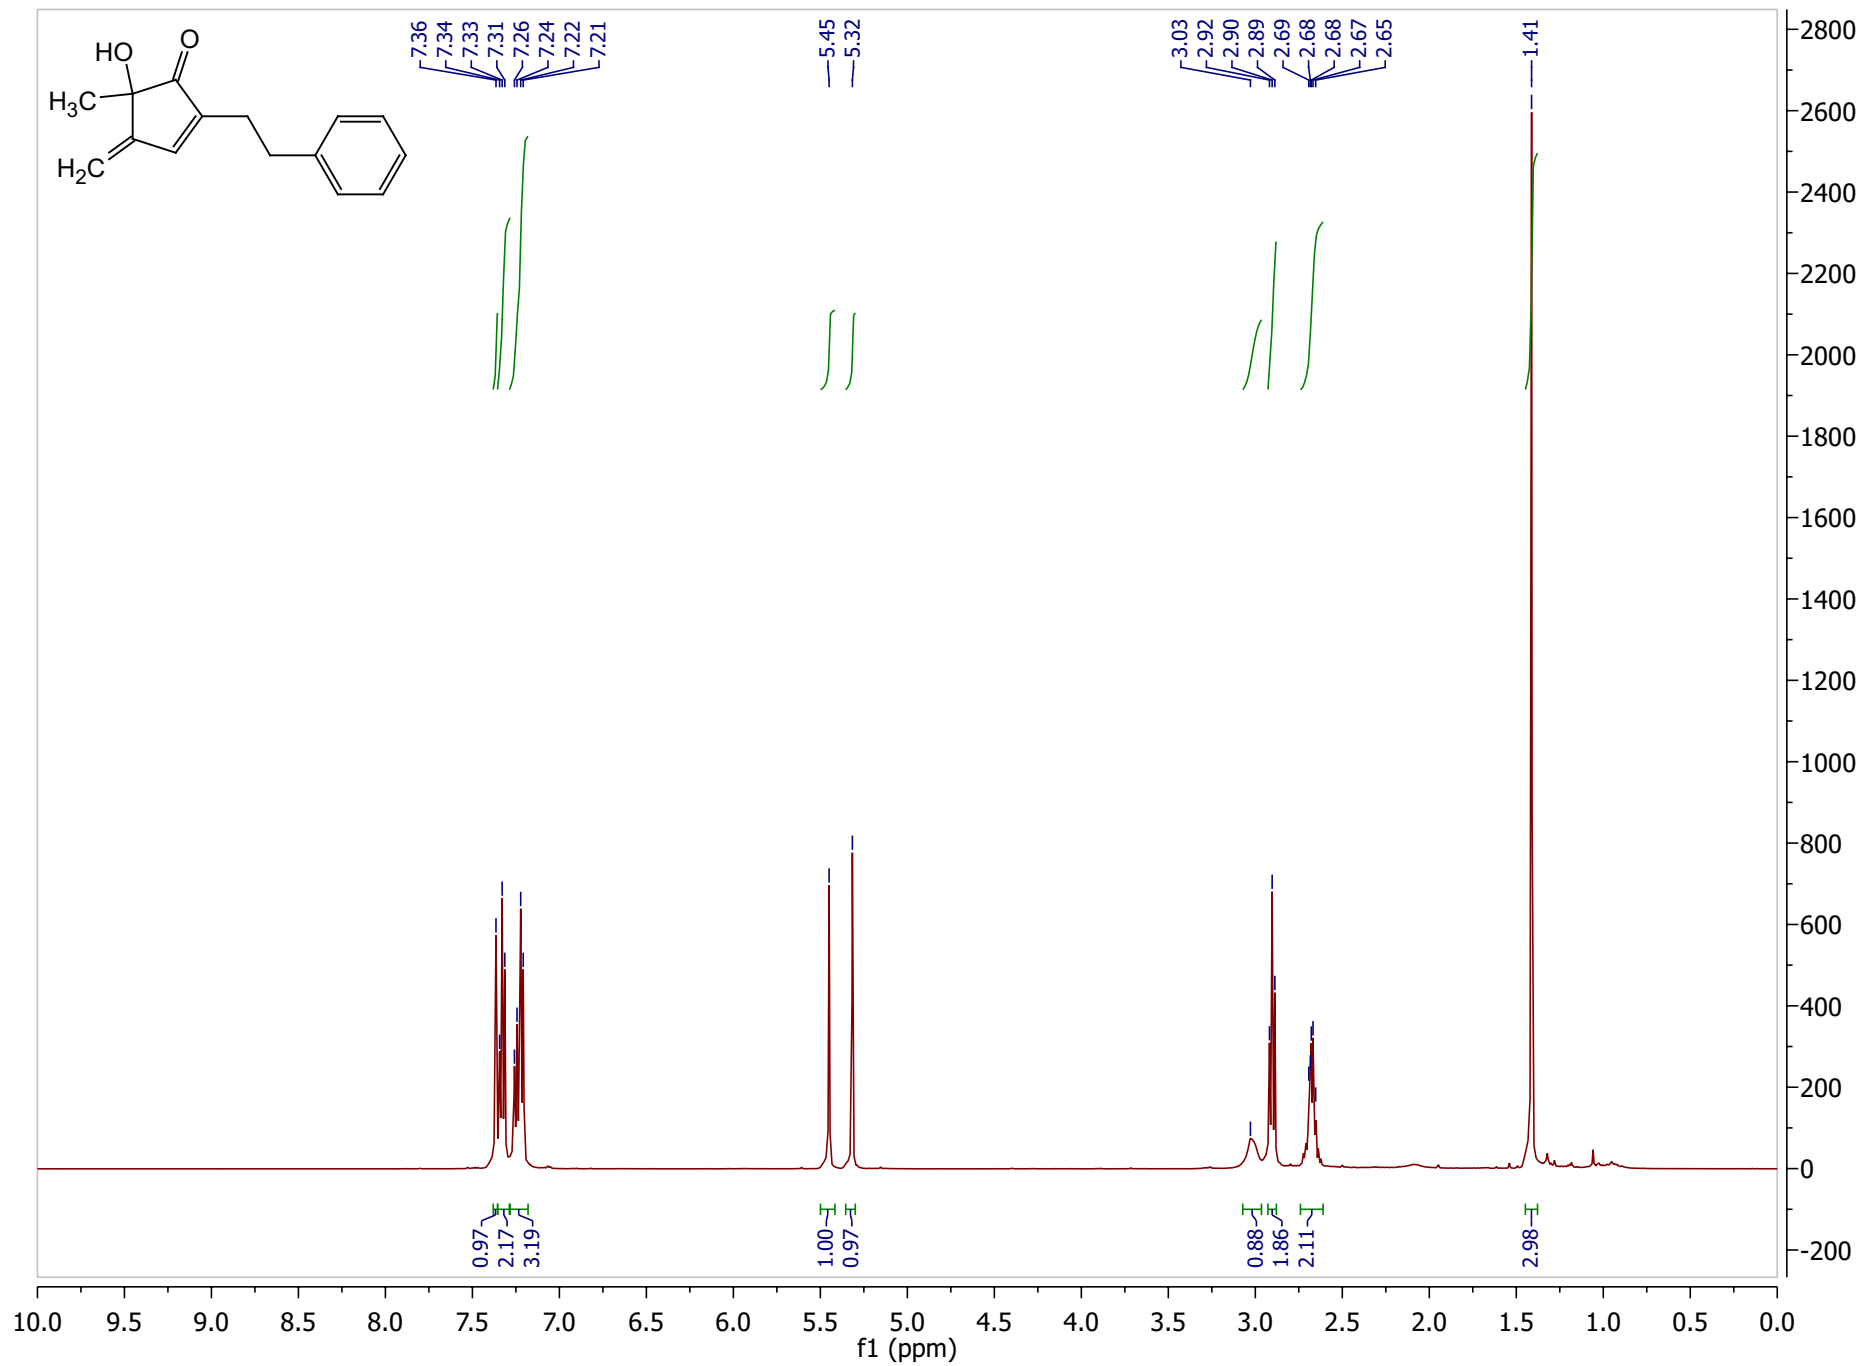

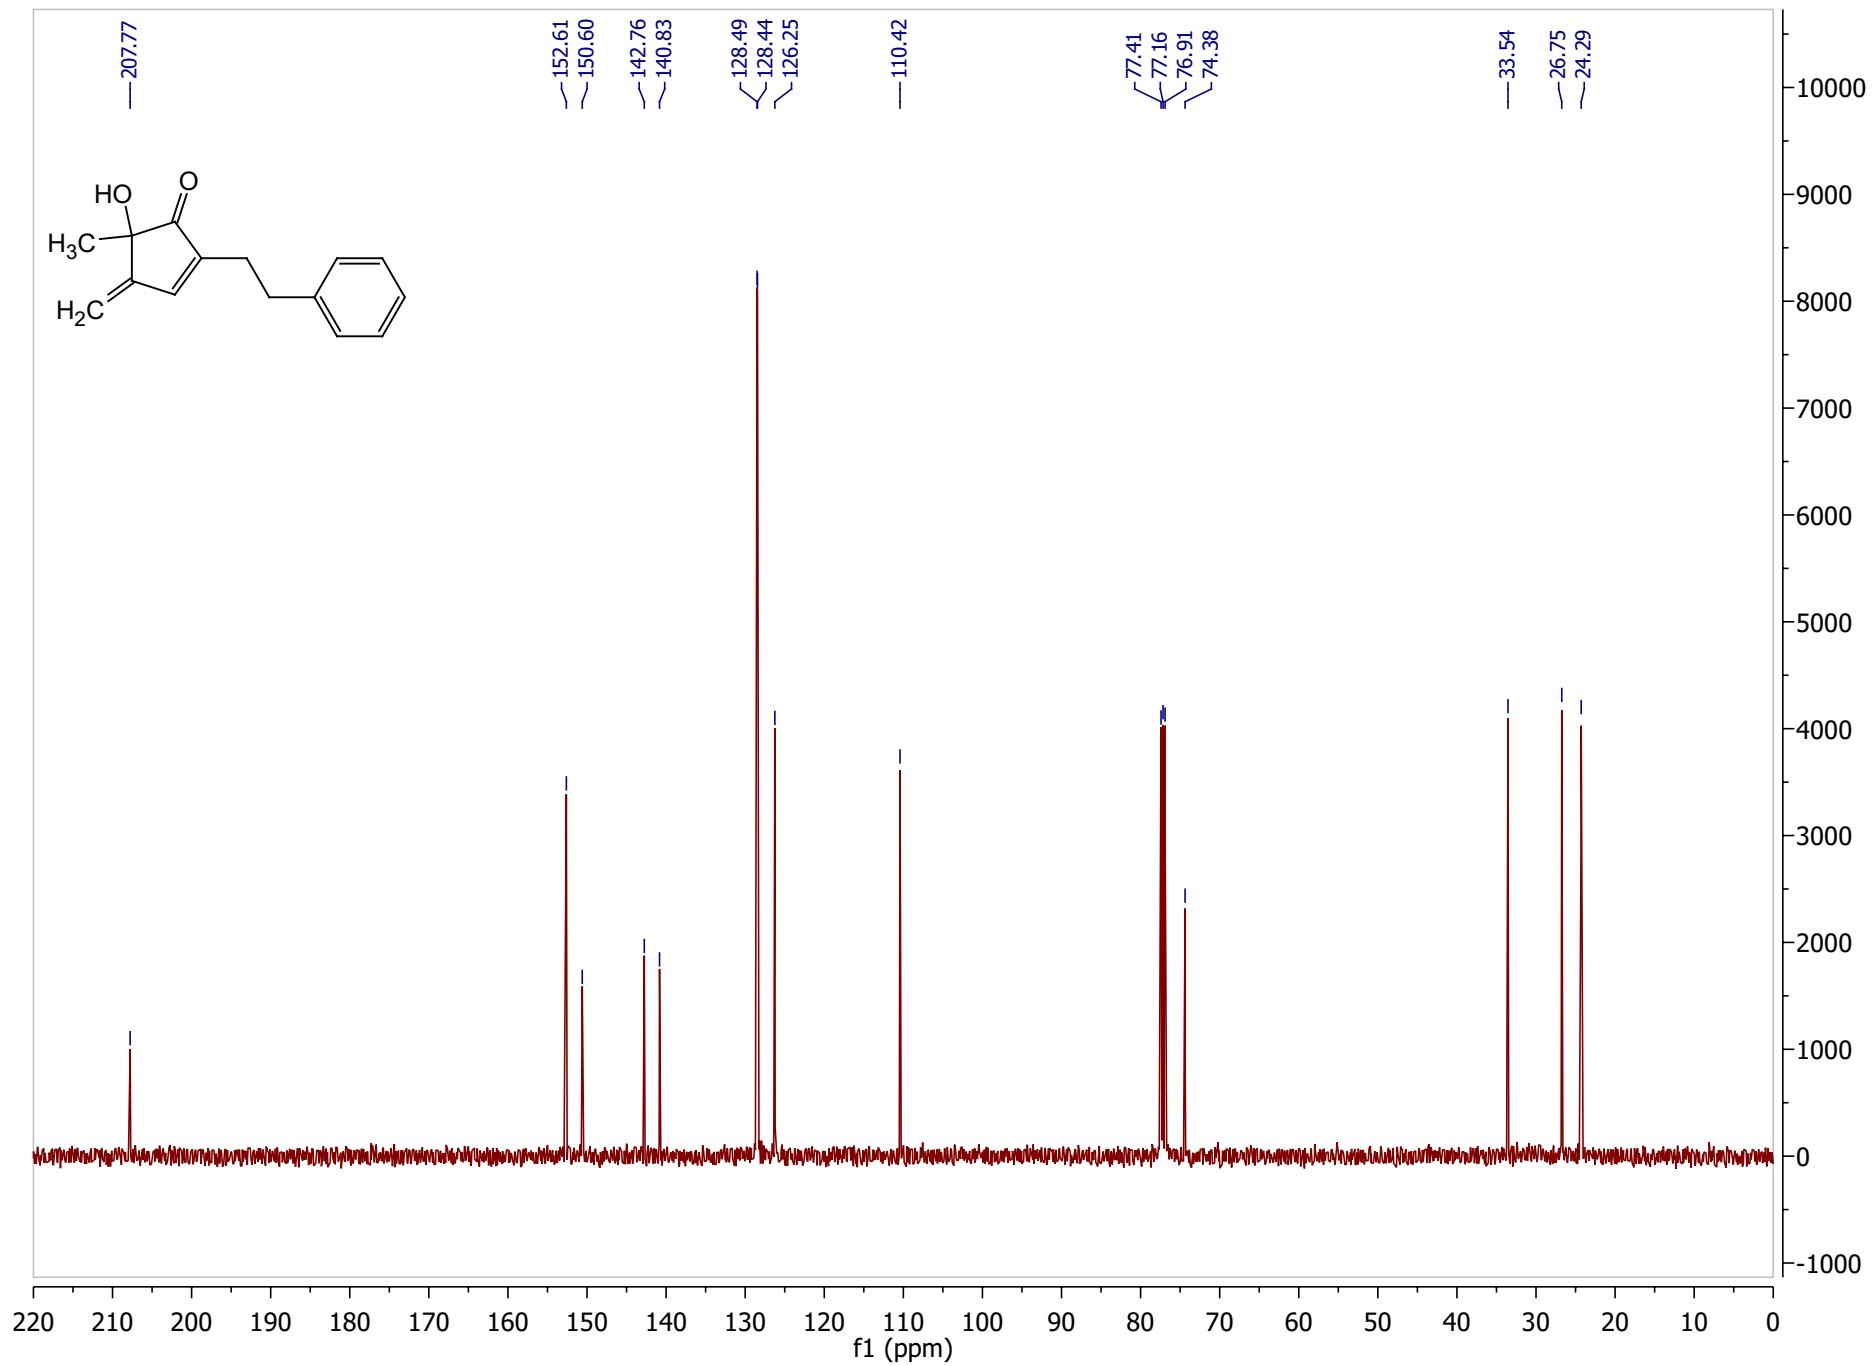



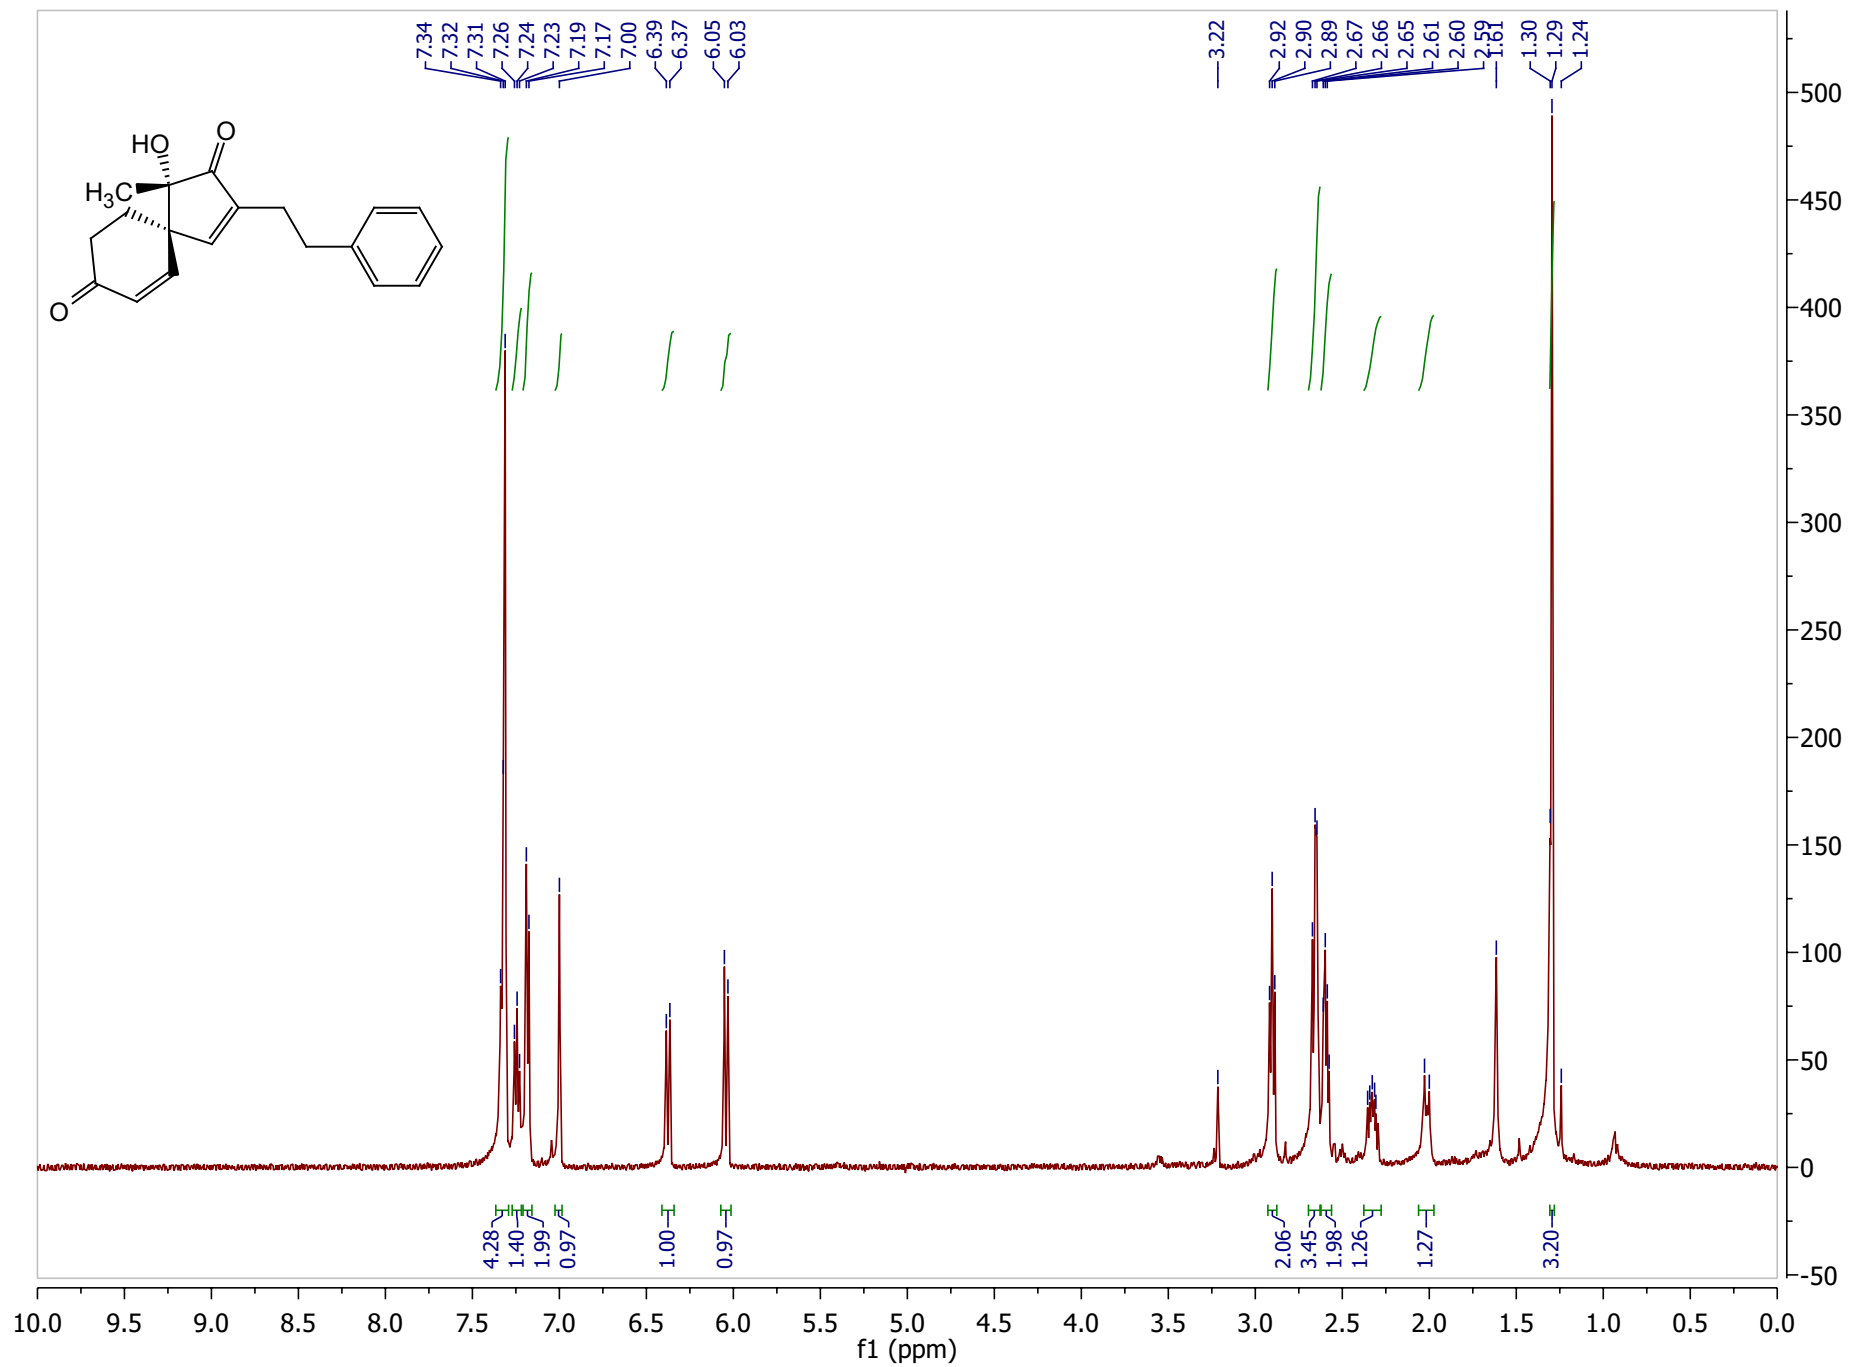

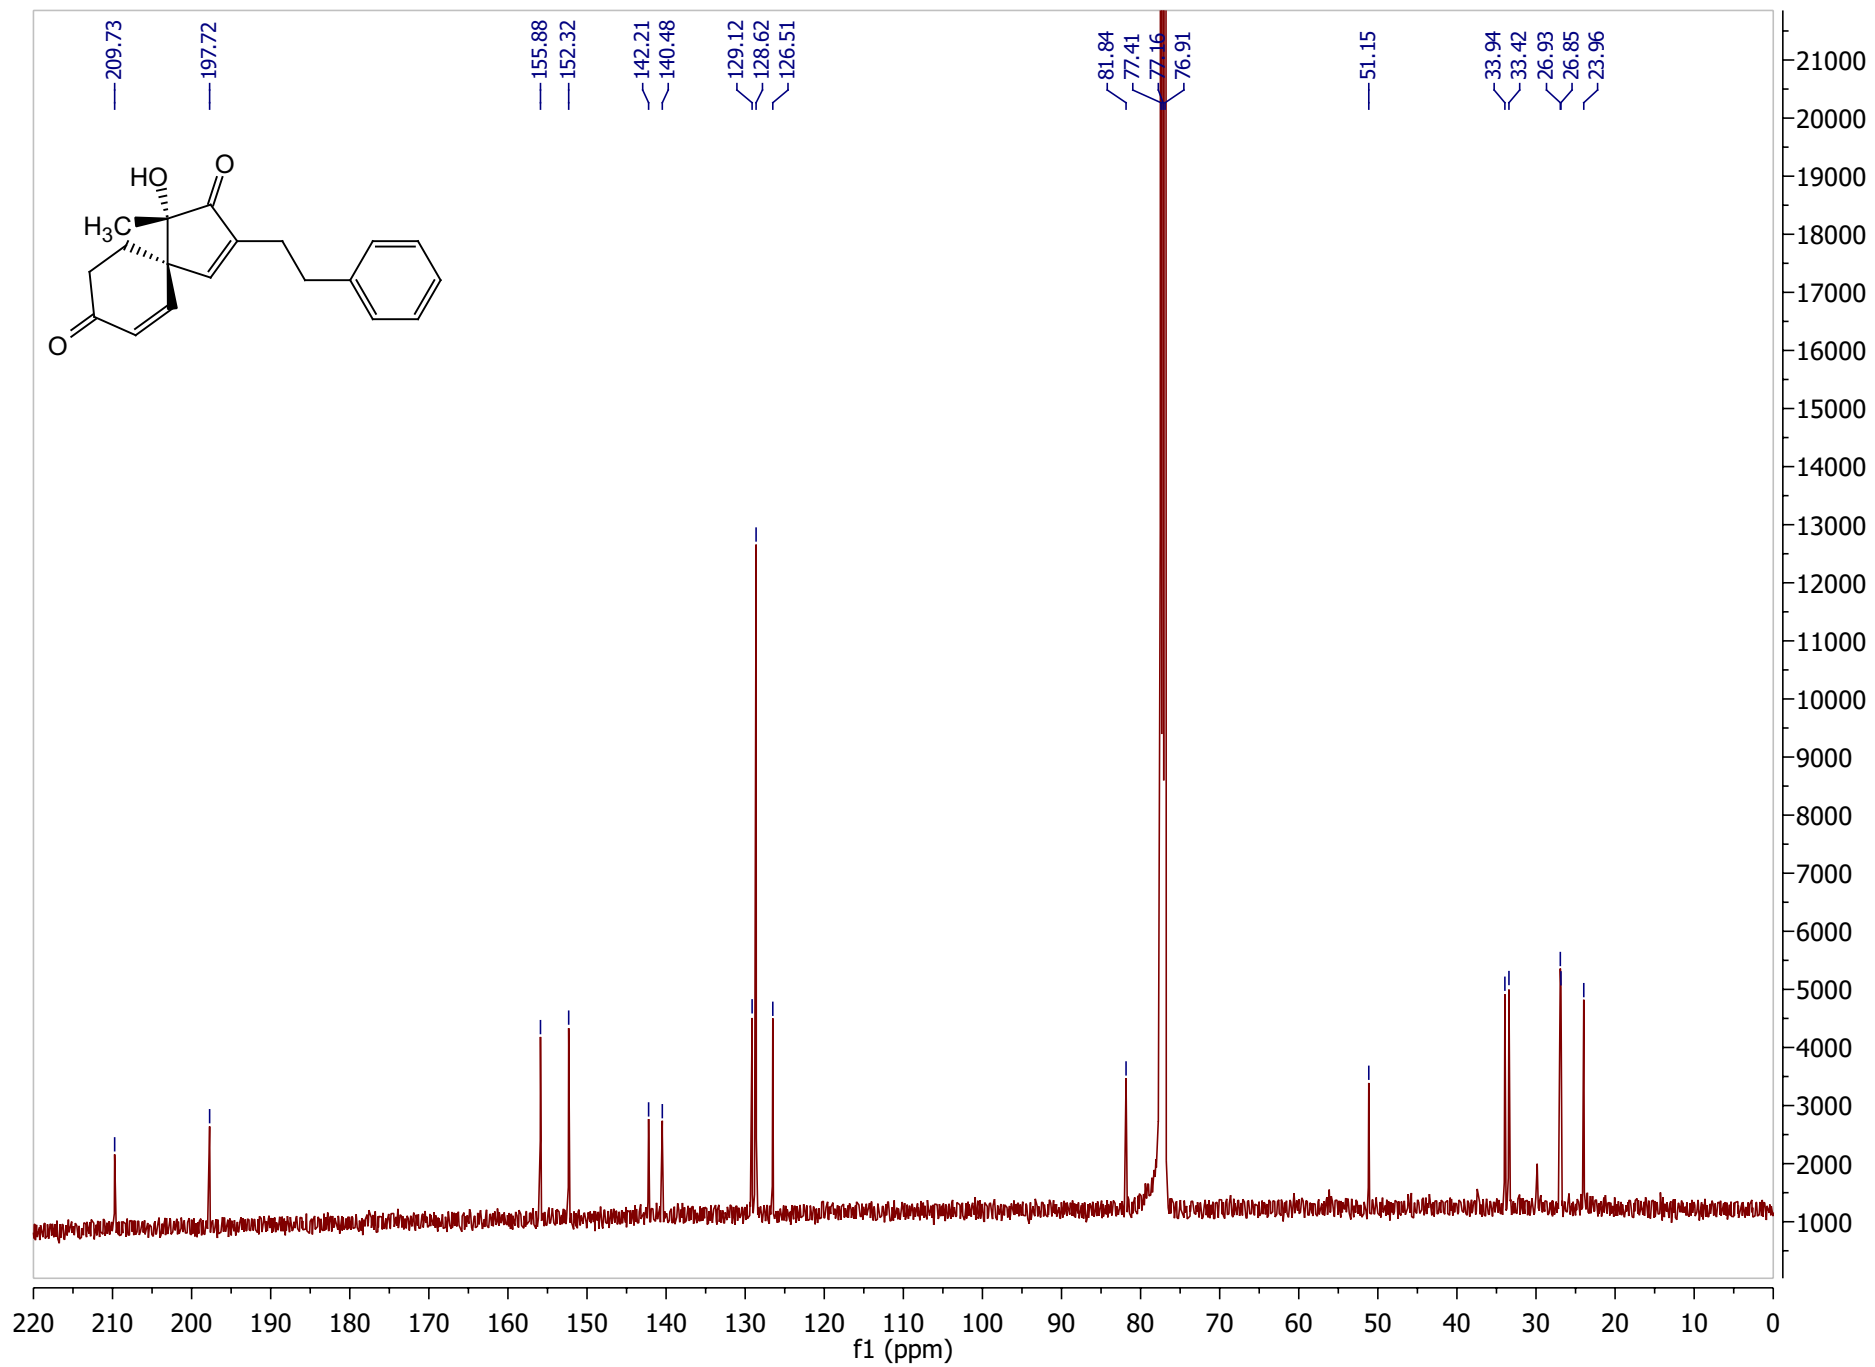

Supplement: NIHMS314271-supplement-5_si_005.pdf [file NIHMS314271-supplement-5_si_005.pdf]
